# Supplementary material for: Spatiotemporal Evolution Characteristics and Obstacle Factors of the Coordinated Development between the Tourism Industry and Ecological Security
Source: Research Square preprint supplement (doi:10.21203/rs.3.rs-6613050/v1), 2025-06-18
Supplement: Supplementary file 1 [file 浙江省旅游产业与生态安全数据收集-朱和王4-by Zhou.xlsx]

## Sheet: 浙江省旅游产业
浙江省 指标层	2008年	2009年	2010年	2011年	2012年	2013年	2014年	2015年	2016年	2017年	2018年	2019年	2020年	2021年	2022年	单位
国内旅游收入A1	2040	2424	3046	3785	4476	5202	5947	6720	7600	8764	9834	10727	8264	6772	5982	亿元
旅游外汇收入A2	30.2408	32.2358	39.302	45.4173	51.5174	53.9293	57.5348	67.8847	74.3063	82.76	25.9579	26.6823	1.6367	2.0424	1.217	亿美元
国内游客接待量A3	20900	24400	29500	34300	39100	43400	47700	53500	58400	64100	69000	73000	57000	41000	37465	万人
入境游客接待量A4	539.67	570.6	684.71	773.69	865.93	866.28	931.03	1012	1120.3	1211.73	456.8	467.1	38.35	42.84	22.06
旅行社营业收入A5	129.647	145.61	205.669	236.912	259.976	240.856	256.671	258.53	543.979			332.217	132.386	167.373	161.545	亿元
星级酒店营业收入A6	186.681	189.487	225.731	223.274	204.098	207.633	220.252	200.411	194.806	186.569	187.463	160.594	120.613	123.236	112.62
旅行社数量A7	1413	1509	1639	1860	2012	2102	2160	2461	2105	2161	2769	2769	2896	3014	3181	家
星级酒店数量A8	1080	1096	1046	991	958	935	831	765	686	604	575	528	533	473	437
旅行社职工人数A9	2.3168	2.2989	2.2202	2.4094	2.648	2.7543	2.7607	2.4066	2.7889	2.7244		3.1057	2.6586	2.4121		万人
星级酒店从业人员A10	14.7425	14.4755	11.0587	8.9162	11.3701	11.887	10.7453	9.8288	9.5109	8.7567	8.041	7.3452	5.8832	5.1959	4.6542
国内旅游收入增长率A11	12.0879	18.824	25.66	24.2613	18.256	16.2198	14.321	12.998	13.095	15.315	12.209	9.08	-22.96	-25.326	-11.666	%
旅游外汇收入增长率A12	11.6634	6.597	21.92	15.5598	13.431	4.682	6.686	17.989	9.4596	11.376	-68.634	2.79	-93.865	24.787	-40.413
国内游客数量增长率A13	9.42408	16.794	20.852	16.2542	14.081	11.029	10.212	9.727	9.076	9.717	8.777	5.547	-21.06	-28.07	-7.317
入境游客数量增长率A14	5.57325	5.7388	19.99	12.9954	11.922	0.041	7.474	8.701	10.698	8.161	37.694	2.267	-91.79	11.72	-48.506
旅游R&D全时当量A15	1.67113	2.14314	2.71904	3.23475	3.85847	4.5835	5.31017	6.07113	6.55575	7.1693	8.15547	9.35715	7.46625	5.29928	4.94381	万人
旅游R&D经费占比A16	1.63021	1.69401	1.87941	2.03877	2.35337	2.57463	2.85767	2.50285	2.8198	3.00849	2.92196	2.8219	2.29815	1.78261	1.50325	%
旅游总收入	2250	2644	3312.6	4080.3	4801.2	5536	6301	7139	8093	9323	10006	10911	8275	6772	5982	亿元
R&D全时当量	15.9589	18.5069	22.3484	25.3687	27.811	31.1042	33.8398	36.471	37.6553	39.8091	45.8038	53.4724	58.2981	57.5284	64.2274	万人年
GDP	21486.9	22832	27227	32000	34606	37568	40154	42886	46485	51768	56197	62352	64613	73516	77715	亿元
一般财政支出	2208.3	2653.35	3207.88	3842.59	4161.88	4730.47	5159.57	6645.98	6974.25	7530.32	8629.53	10053	10082	11016.9	12017.7
旅游R&D经费支出	36	44.948	60.2893	78.3418	97.9445	121.792	147.443	166.339	196.66	226.549	252.151	283.686	231.7	196.388	180.656
R&D经费支出	343.791	388.144	495.531	614.4	705.962	826.496	939.604	999.244	1129.59	1257.96	1416.16	1621.15	1809.16	2131.96	2346.99
数据来源
浙江省国民经济和社会发展统计公报
https://www.ceicdata.com.cn/zh-hans/china/tourism-zhejiang
https://www.stats.gov.cn/zt_18555/ztsj/kjndsj/kj2008/index.html
https://www.macrodatas.cn/article/1147466879
浙江省统计年鉴
https://www.gotohui.com/gongzi/show-1321973

## Sheet: 浙江省生态安全
指标层	2008年	2009年	2010年	2011年	2012年	2013年	2014年	2015年	2016年	2017年	2018年	2019年	2020年	2021年	2022年	单位
人均GDP增速B1	12.64	6.044	17.378	13.144	5.652	6.56	5.32	6.864	6.97	9.221	8.898	5.942	1.992	12.204	2.2	%
人口自然增长率B2	4.58	4.63	4.99	4.07	4.6	4.56	5	5.02	5.7	6.36	5.44	4.99	4.99	1	0.04
城镇化水平B3	29.768	30.405	30.938	31.4115	31.705	64	64.87	65.8	67	68	68.9	70	72.17	72.7	73.4
废水排放总量B4	350377	365017	422618	420417	420960	419120	418262	433822	430856	453935	463895	476707	412130	437671	433723	万吨
SO2排放总量B5	715900	677000	665000	647000	611000	593000	574000	538000	268000	181000	129000	89000	50000	42000	40000	吨
固体废弃物排放量B6	1.67	0.78	2.54	0.34	0.4	0	0	0	0.28	0	0	0	0	0	0	万吨
森林覆盖率B7	60.65	60.65	60.58	60.58	60.58	60.82	60.91	60.96	61	61.17	61.15	61.15	61.17	61.24	61.27	%
绿地园林面积B8	69621	74362	79459	105200	122723	127927	132619	138039	154314	159214	167370	172280	179350	183218	189757	公顷
人均公园绿地面积B9	9.6	10.76	11.05	11.77	12.47	12.44	12.9	13.19	13.17	13.32	13.73	14.03	13.59	12.87	14.2	㎡
人均水资源总量B10	1824.35	1974.8	2943.61	1556.5	3010.39	1928.57	2326.92	2883.26	2692.32	1806.01	1733.14	2622.31	2025.25	2638.91	1828.13	m³（常住人口）
人均耕地面积B11	0.56	0.37	0.36	0.36	0.54	0.54	0.45	0.54	0.53	0.52	0.52	0.33	0.3	0.3	0.3	公顷（户籍人口）
人均林地面积B12	0.13	0.13	0.12	0.12	0.12	0.12	0.12	0.12	0.12	0.12	0.12	0.11	0.1	0.1	0.1
城镇生活污水处理率B13	75.1	78.88	82.74	85.09	87.5	89.28	90.68	91.95	93.89	94.98	95.75	96.95	97.69	97.92	98.14	%
生活垃圾无害化处理率B14	86.41	95.36	96.32	94.91	97.81	99.4	100	99.2	100	100	100	100	100	100	100
固体废物综合利用率B15	92.19	91.55	82.07	91.07	90.45	93.24	92.75	92.55	89.34	89.85	92.11	93.8	98.51	99.35	99.42
环保支出占GDP比重B16	2.42	2.26	1.2	0.74	1.08	1.04	1.18	1.03	1.38	0.87	1.18	0.43	0.34	0.27	0.29

## Sheet: 2010年
	杭州市	宁波市	温州市	嘉兴市	湖州市	绍兴市	金华市	衢州市	舟山市	台州市	丽水市	单位	浙江省占全国（2010年）	浙江省（2010年）	浙江省（2009年）	全国（2010）	备注
国内旅游收入A1	910.9	610.7	317.33	280.62	205.61	305.84	258.01	91.56	133.14	269.424	97.11	亿元		3480.24			温州市统计年鉴有各个市的
旅游外汇收入A2	16.9	5.9	2.11	2.2643	1.2585	1.8478	3.767	0.5123	1.3094	0.5629	2.8908	亿美元		39.323
国内游客接待量A3	6304.89	4624	3487.14	3070.14	2855.68	3436.44	2882.71	1639.28	2113.32	3285.66	2065.3	万人次		35764.6
入境游客接待量A4	275.71	95.2	39.16	66.4063	33.165	52.2841	62.7437	9.8826	25.679	10.2947	12.9155			683.441
旅行社营业收入A5	56.2904	35.7159	18.2026	16.245	11.7531	17.4738	15.5645	5.22568	7.79516	15.0064	6.39627	亿元		205.669		2649.01
星级酒店营业收入A6	91.1591	36.364	20.0428	13.3019	9.62379	14.3081	12.7447	4.27894	6.38291	12.2877	5.23745			225.731		2123.79
旅行社数量A7	504	279	124.608	111.207	80.4573	119.619	106.549	35.773	108	126	43.7864	家		1639		22784
星级酒店数量A8	236	206	99	54	48	94	84	45	61	60	52			1046		13991	温州市统计年鉴有各个市的星级饭店数
旅行社职工人数A9	0.682722	0.377935	0.168795	0.150642	0.108988	0.162037	0.144332	0.0484583	0.146297	0.17068	0.0593134	万人		2.2202		27.7262
星级酒店从业人员A10	2.8177	2.3694	1.2052	0.505995	0.449773	0.880806	0.787104	0.421663	0.571587	0.562217	0.487255			11.0587		1898.13
国内旅游收入增长率A11	28.4949	22	25.1	30.09	29.3	26.2497	27.2	31.6	22.4276	18.8705	36.5	%
旅游外汇收入增长率A12	22.474	21.4	18.6	18.04	27	24.6997	23.8	21.1	15.1	13.3965	24.3
国内游客数量增长率A13	23.7731	16.7	19	23.2	23	20.5191	22.4	28.9	22.1162	13.8001	34.1
入境游客数量增长率A14	19.6655	18.9	18.8	19.29	31.9	21.1026	18	15.9	14.9041	18.9595	22.7
旅游R&D全时当量A15	1.15041	0.568344	0.21055	0.295904	0.126864	0.250084	0.196982	0.0308129	0.0551236	0.225196	0.0291191	万人
旅游R&D经费占比A16	4.82433	1.7005	1.17613	3.14604	2.7107	2.93922	1.99173	0.559125	1.3757	1.63944	0.341684	%
人均GDP增速B1	9.7	23.0057	2.48217	14.666	15.3373	12.1563	15.1964	28.3571	12.612	14.9665	29.5987	%（常住人口）
人口自然增长率B2	3.41	2.34	10.1	0.67	0.09	-0.61	3.63	3.55	-1.21	6.22	7.58	%
城镇化水平B3	73.25	68.31	66.02	53.33	52.89	58.58	59.02	44.13	63.59	55.54	48.4	%（常住人口）
废水排放总量B4	80468	47983	40300	31660	10887.8	41704.5	12309.3	12255.7	3895.71	19510.3	14025.1	万吨
SO2排放总量B5	88682	110900	63000	67198	50976	62006	28045	26322	23898	25309.7	15200	吨		561537
固体废弃物排放量B6	0.18	0.03	0.27	0.02	0	0	0	0	0	0	6.88	万吨
森林覆盖率B7	64.56	50.2	60.03	12.7	50.9	54.03	60.44	71.5	50	59.3	80.79	%
绿地园林面积B8	17503	15780	5715	9540	7630	9925	14320	4004	2233	9502	3374	公顷					温州市统计年鉴有各个市的绿地面积
人均公园绿地面积B9	15.12	10.62	6.28	12.59	14.79	5.7939	8.21	11.49	15.45	10.14	11.55	㎡
人均水资源总量B10	2762.9	1579.57	2441	879.4	1781	1730	3261.89	6319	777.2	2047	11670	m³（常住人口）
人均耕地面积B11	0.0321725	0.0388051	0.030821	0.0643871					0.0249913	0.0329595	0.0641665	公顷（户籍人口）
人均林地面积B12	0.16966	0.0647902	0.00573801						0.0537447	0.0925935	0.525033	公顷（户籍人口）
城镇生活污水处理率B13	92	82.81	65.8	84.8	84.8	87.96	70.2	75.65	74.8	75.6	66.9	%
生活垃圾无害化处理率B14	100	98.64	89.14	100	100	100	99.31	100	100	96.99	99.57	%
固体废物综合利用率B15	94.13	94.88	95.35	97.6	96.49	93.15	98.59	97.24	99.75	97.6	94.99	%（工业）
环保支出占GDP比重B16	0.233105	0.378281	0.224913	0.334495	0.517072	0.206631	0.267819	0.524722	0.355198	0.207443	0.467362	%
环保支出	13.86	19.39	6.58	7.68	6.73	5.75	5.61	3.95	2.25	5.01	3.01	亿元					温州市统计年鉴有各个市的环境保护支出
旅游总收入	1025.7	650.8	331.68	296.01	214.16	318.4	283.61	95.22	142.04	273.44	116.55		0.238701	3747.61		15700
一般财政支出	616.58	600.74	310.78	199.063	127.12	221.95	211.52	107.09	105.03	222.76	135.2						温州市统计年鉴有各个市的地方财政一般预算支出
旅游R&D经费支出	29.7459	10.2156	3.65518	6.26261	3.44584	6.5236	4.2129	0.598767	1.4449	3.65201	0.461957
R&D经费支出														494.235	398.84		https://tjj.zj.gov.cn/art/2020/6/19/art_1229129205_519809.html https://tjj.zj.gov.cn/art/2014/9/11/art_1530870_20981106.html https://www.stats.gov.cn/zt_18555/ztsj/kjndsj/kj2010/202303/t20230303_1925192.html 温州市统计年鉴有各个市的R&D经费支出(不准确）
2009（占浙江的比重）	34.8887	16.2797	6.72701	9.8285	4.23729	11.536	6.29576	0.957778	1.30378	6.52643	0.516498	%
2009	139.15	64.93	26.83	39.2	16.9	46.01	25.11	3.82	5.2	26.03	2.06	亿元
2010	172.432	80.46	32.2404	48.5759	20.9422	57.0147	31.1158	4.73367	6.44374	32.2559	2.55271
R&D全时当量												万人年		22.3484
2009（占浙江的比重）	29.84	20.03	8.31	10.27	3.45	9.78	6.51	1.09	1.1	8.9	0.72	%
2010	6.66876	4.47638	1.85715	2.29518	0.77102	2.18567	1.45488	0.243598	0.245832	1.98901	0.160908	万人年					https://www.stats.gov.cn/zt_18555/ztsj/kjndsj/kj2010/202303/t20230303_1925198.html
GDP																	温州市统计年鉴有各个市地区生产总值
2009			2527.34	1917.96	1111.5	2375.46	1765.94	617.5	533.26	2025.47	542.02	亿元
2010	5945.82	5125.82	2925.57	2296	1301.56	2782.74	2094.7	752.78	633.45	2415.12	644.04
常住人口数
2009	810	719	807.6	431.2	285	470.3	520.7	223.5	106.3	575.5	230.9	万人
2010			912.21	450.17	289.354	491.22	536.16	212.27	112.13	596.88	211.7
人均GDP
2009			3.12945	4.44796	3.9	5.05095	3.39147	2.76286	5.01656	3.5195	2.34742	万元/人
2010			3.20712	5.1003	4.49815	5.66496	3.90686	3.54633	5.64925	4.04624	3.04223
人均GDP增速
2010			0.0248217	0.14666	0.153373	0.121563	0.151964	0.283571	0.12612	0.149665	0.295987
耕地面积	332.56		363.75							288.3		万亩					https://zrzyt.zj.gov.cn/art/2011/12/1/art_1289935_5609110.html：2009年国家开展了第二次全国土地调查，因此2009、2010、2011年土地利用变化情况数据以第二次全国土地调查成果为准，第二次全国土地调查成果已于2014年6月19日在《关于浙江省第二次土地调查主要数据成果的公报》中发布
	22.1707	22.278	24.25	21.9946					2.41843	19.22	16.6607	万公顷		198.67
林地面积	1753.74		67.72								2012.82	万亩
	116.916	37.1961	4.51467	0.538208					5.20093	53.995	136.324	万公顷		568.73
公园绿地面积	5772	3483	1715			2543						公顷					温州市统计年鉴有各个市的公园绿地面积
户籍人口	689.12	574.1	786.8	341.6	259.98	438.91	259.98	251.24	96.771	583.14	259.648	万人
固体废物产生量		1154.06		377.68		333.92	253.47		77.85	245.8	146.92	万吨
固体废物综合利用量		1034.72		368.59		318.39	249.9		77.66	239.97	140.04
固体废物贮存量		59.03		0.06		2.67				1.05
固体废物处置量		60.28		9.01		12.86	3.58		0.35	4.84
水资源总量												万立方米					温州市统计年鉴有各个市的水资源总量
废水排放总量包括生产废水和生活污水
数据来源：	各市统计年鉴
	国民经济和社会发展统计公报【户籍人口，水资源，耕地面积，林地面积，森林覆盖率，人均公园绿地面积】
	旅游概览
	水资源公报【水资源总量，人均拥有水资源量】
	环境状况公报/环境质量概要【GDP，污染物排放状况：二氧化硫排放总量、废水排放总量，污染治理投资，（工业）固体废物：综合利用率、排放量，城镇生活污水集中处理率，生活垃圾无害化处理率，水资源，农用地：耕地面积、林地面积，森林覆盖率】
	土地利用总体规划
	第x次全国国土调查主要数据公报
	森林资源与生态状况公报（林地面积、森林覆盖率）
	R&D普查公报（https://www.stats.gov.cn/sj/tjgb/rdpcgb/）
	中国科技统计年鉴【R&D全时当量、(&D经费内部支出】
	各市第二次全国国土调查主要数据公报【耕地、林地面积】，适用于2009、2010、2011年
	2010年度全国星级饭店统计公报
	浙江省嘉兴市土地利用总体规划(1997-2010)

## Sheet: 2014年
	杭州市	宁波市	温州市	嘉兴市	湖州市	绍兴市	金华市	衢州市	舟山市	台州市	丽水市	单位	浙江省占全国（2014年）	浙江省（2014年）	浙江省（2009年）	全国（2014）	备注
国内旅游收入A1	1743.9	1020.3	651.43	551.06	489.41	636.73	590.53	236.887	467.253	580.53	294.987	亿元					温州市统计年鉴有各个市的
旅游外汇收入A2	23.18	7.7832	4.8132	2.2728	2.2511	2.4971	4.7974	0.5696	1.6227	0.4909	7.2576	亿美元
国内游客接待量A3	10606.4	6874.6	6487.4	5320.57	5896.47	6254.86	5897.88	3755.82	3366.38	6078.85	5456.59	万人次
入境游客接待量A4	326.13	139.7	91.0803	70.6642	60.2847	70.21	84.13	11.6046	31.5835	15.5286	29.8334
旅行社营业收入A5	65.3891	37.0254	23.6067	19.5866	17.4433	22.6038	21.4921	8.33271	11.7319	20.2286	9.23087	亿元		256.671		4029.59
星级酒店营业收入A6	58.79	35.79	26.44	14.8762	13.2484	17.1678	16.3235	6.32878	8.91052	15.3638	7.01094			220.25		2151.45
旅行社数量A7	658	297	184.7	153.247	136.478	137	168.156	65.1957	143	145	72.223	家		2160		26650
星级酒店数量A8	195	135	83	65.5156	49	75.6079	61	37	45	54	30.8765			831		12803	温州市统计年鉴有各个市的星级饭店数
旅行社职工人数A9	0.840991	0.379596	0.236066	0.195865	0.174432	0.1751	0.214921	0.0833268	0.182769	0.185325	0.0923084	万人		2.7607		34.1312
星级酒店从业人员A10	2.76	1.81	1.32	0.761736	0.569713	0.879078	0.709234	0.430191	0.523206	0.627847	0.358995			10.75		1634.28
国内旅游收入增长率A11	18.6407	12.8	17.1	17.1	28.4	11.8542	27.8	22.3	61.0491	18.2993	29.2	%
旅游外汇收入增长率A12	7.3	-2.22111	15.6	6.8	12.4	2.39892	5.6	-1.5	-0.60241	15.0996	18.5
国内游客数量增长率A13	12.7	10.4	14.3	14.2	20.3	11.4	22	14.6	10.8846	17.6808	20.1
入境游客数量增长率A14	3.2	9.7	19.1	7.4	13.1	0.832974	5.6	-4.1	0.145858	42.6079	15.7
旅游R&D全时当量A15	2.07015	0.952278	0.445066	0.585718	0.300344	0.505886	0.425735	0.0795132	0.124087	0.518839	0.0616883	万人					#DIV/0!
旅游R&D经费占比A16	3.78355	2.24596	2.78539	4.3646	5.41738	3.95688	3.1771	1.55999	2.4746	2.70695	1.33894	%
人均GDP增速B1	7.6	6.22049	6.3	7.2	7.9	7.4	7.8	7.3	9.9	7	6.6	%（常住人口）
人口自然增长率B2	6.94	3.59	8.1	3.14	3.45	2.64	4.02	5.56	0.4	5.09	6.1	%
城镇化水平B3	75.1	71.1	67.2	59.2	57.4	62.1	63.3	49	66.7	59.5	55.2	%（常住人口）
废水排放总量B4	32226.2	61724.8	6020.39	20636	22022.9	48250.2	7626.54	12478.2	7263	6821.64	6127.24	万吨
SO2排放总量B5	69805	129300	34125	81000	38424	65747.4	39210	49415	13869	28083	26248	吨
固体废弃物排放量B6	0	0	0	0	0	0	0	0	0	0	0	万吨
森林覆盖率B7	65.14		60.03		50.9	54.03	60.95	71.5		60.3	80.79	%
绿地园林面积B8	20601	18683	11601	12710	9195	11744	15502	4699	13801	11470	4401.74	公顷					温州市统计年鉴有各个市的绿地面积
人均公园绿地面积B9	15.5	11.45	12.99	13.34	15.91		10.78	12.82	13.65	12.54	11.73	㎡
人均水资源总量B10	1833.17	1029.38	1753.51	514.744	1346.39	1460.86	2117.52	5662.58	692.731	1867.17	10914.8	m³（常住人口）
人均耕地面积B11	0.0315515		0.0298672			0.0472756				0.033292	0.06	公顷（户籍人口）
人均林地面积B12	0.164043		0.0832135							0.104343		公顷（户籍人口）
城镇生活污水处理率B13	93.9	89.95	87.3	90.4	91.98	87.9	86.2	88.83	86.02	88.9	81.1	%
生活垃圾无害化处理率B14	100	100	99.8	100	98.94	100	99.85	100	100	100	100	%
固体废物综合利用率B15	89.86	90.76	98.09	94.5591	96.59	95.18	97.2	94.5597		94.62	95.34	%（工业）
环保支出占GDP比重B16	0.326263	0.25097	0.180115	0.324524	0.511759	0.166437	0.320741	0.656443	0.281701	0.254769	0.370811	%
环保支出	30.02	19.08	7.75	10.88	10.01	7.1	10.29	7.32	2.86	8.63	3.9	亿元					温州市统计年鉴有各个市的环境保护支出
旅游总收入	1886.33	1068.1	681	565.03	503.2	652.07	620	240.38	338.44	583.55	266.29		0.198509	7404.39		37300
一般财政支出	961.18	1000.86	488.98	334.9	224.57	346.44	352.86	191.94	188.19	371.47	217.27						温州市统计年鉴有各个市的地方财政一般预算支出
旅游R&D经费支出	36.3667	22.4789	13.62	14.617	12.1658	13.7082	11.2107	2.99424	4.65694	10.0555	2.90912
R&D经费支出														907.85	398.84		https://www.stats.gov.cn/sj/tjgb/rdpcgb/qgkjjftrtjgb/202302/t20230206_1902124.html 温州市统计年鉴有各个市的R&D经费支出
2009（占浙江的比重）												%
2009												亿元
2014	177.39	160	86.0562	86.73	47.29	89.68	58.01	13.89	13.97	58.37	11.49			907.9
R&D全时当量												万人年		33.8398
2009（占浙江的比重）	29.84	20.03	8.31	10.27	3.45	9.78	6.51	1.09	1.1	8.9	0.72	%
2014	10.0978	6.77812	2.81209	3.47535	1.16747	3.30953	2.20297	0.368854	0.372238	3.01174	0.243647	万人年					https://www.stats.gov.cn/zt_18555/ztsj/kjndsj/kj2010/202303/t20230303_1925198.html
GDP																	温州市统计年鉴有各个市地区生产总值
2013		7128.9	4003.86									亿元
2014	9201.16	7602.51	4302.81	3352.6	1956	4265.88	3208.2	1115.1	1015.26	3387.38	1051.75
常住人口数
2013												万人
2014	889.2	781.1	906.8	457	293	495.6	543.7	212.4	114.6	601.5	213.1
人均GDP
2013		9.3176										万元/人
2014		9.8972	4.74505
耕地面积	338.75		364.54							298.18		万亩		2964.9
	22.5833	0	24.3027	0	0	20.945	0	0	0	19.8787	0	万公顷
林地面积	1761.23											万亩		8480
	117.415		67.71							62.303		万公顷
森林面积
土地面积	16596	9816	12065	3915	5820	8279	10942	8845	1455	9411	17298	平方公里
公园绿地面积	7003	4069	3976	2484	2411	2833	2931	1049	966	2715	1123	公顷					温州市统计年鉴有各个市的公园绿地面积
户籍人口	715.76	583.78	813.69	348.14	263.78	443.04	475.07	255.67	97.49	597.1	265.65	万人
固体废物产生量	737.11	1196.32	247.49	533	185.93	376.498	227	512.29	94.07	272.49	189.23	万吨
固体废物综合利用量	662.34	1114.2	242.75	504	179.6	358.457	225.27	484.42	94.27	257.83	180.41
固体废物贮存量		26.35	0.23			2.5263				2.42
固体废物处置量	70.27	56.8	4.51			16.1543	6.32	20.15	0.35	13.25
水资源总量	1630054	804052	1590086	235238	394491	724004	1151293	1202733	79387	1123101	2325934	万立方米					温州市统计年鉴有各个市的水资源总量
国内旅游收入												亿元
2013
旅游外汇收入												亿美元
2013		7.96
国内游客接待量												万人次
2013
入境游客接待量
2013
废水排放总量包括生产废水和生活污水
数据来源：	各市统计年鉴
	国民经济和社会发展统计公报【户籍人口，水资源，耕地面积，林地面积，森林覆盖率，人均公园绿地面积】
	旅游概览
	水资源公报【水资源总量，人均拥有水资源量】
	环境状况公报/环境质量概要【GDP，污染物排放状况：二氧化硫排放总量、废水排放总量，污染治理投资，（工业）固体废物：综合利用率、排放量，城镇生活污水集中处理率，生活垃圾无害化处理率，水资源，农用地：耕地面积、林地面积，森林覆盖率】
	土地利用总体规划
	第x次全国国土调查主要数据公报
	森林资源与生态状况公报（林地面积、森林覆盖率）
	R&D普查公报（https://www.stats.gov.cn/sj/tjgb/rdpcgb/）
	中国科技统计年鉴【R&D全时当量、(&D经费内部支出】
	2014年中国旅游业统计公报【全国旅行社数量、营业收入】

## Sheet: 2018年
	杭州市	宁波市	温州市	嘉兴市	湖州市	绍兴市	金华市	衢州市	舟山市	台州市	丽水市	单位	浙江省占全国（2018年）	浙江省（2018年）	浙江省（2009年）	全国（2018）	备注
国内旅游收入A1	3335.61	1977.85	1315.1	1212.22	1347.97	1179.42	1317.74	531.789	904.203	1298.02	667.624	亿元	0.257777	15389.3		59700	温州市统计年鉴有各个市的
旅游外汇收入A2	38.3	4.2	2.9155	2.904	4.2235	0.6798	5.0089	0.0587	1.6354	0.6355	0.0392	亿美元
国内游客接待量A3	17982.8	12427.3	11861.1	10647	11629.4	10878.7	12017.7	7453.86	0.6291	11821.7	7233.95	万人次
入境游客接待量A4	420.5	84	55.5291	53.33	109.953	14.72	84.2925	1.408	17.748	18.3787	1.0136
旅行社营业收入A5	269.309	150.498	100.127	92.4013	93.7399	88.8416	101.364	39.9322	70.6981	97.7131	50.1145	亿元		1154.74		4479.6
星级酒店营业收入A6	52.88	36.44	21.4	11.1702	11.332	10.7399	12.2536	4.82731	8.54653	11.8123	6.05822			187.46
旅行社数量A7	848	319	232.04	214.136	217.238	146	234.906	92.5413	175	174	116.138	家		2769		37309	该处缺少2018年浙江省旅行社数量的数据，因此使用2019年的
星级酒店数量A8	145	108	66	7.7803	40	52	43	29	26	54	4.2197			575		8962	温州市统计年鉴有各个市的星级饭店数
旅行社职工人数A9	3.05833	1.15048	0.836858	0.772287	0.783476	0.526552	0.847193	0.333752	0.631142	0.627535	0.418855	万人		9.98646		38.7407
星级酒店从业人员A10	1.97	1.39	1.06	0.110018	0.565625	0.735313	0.608047	0.410078	0.367656	0.763594	0.0596692			8.04
国内旅游收入增长率A11	19.0393	19.9	19.2	19.9	25.2881	17.2	19	18.4	17.3203	16.9408	16.6	%
旅游外汇收入增长率A12	8.1	-57.5758	-57.7464	28.4956	3.0122	-78.7123	-0.1	5.1	-7.2	-3.3	11.7
国内游客数量增长率A13	13.2146	13.9	15.9	16.5	10.2042	14	16.7	15	14.9602	15.0467	6.61117
入境游客数量增长率A14	4.5	-55.0562	-60.051	-25.4334	4.02356	-83.4848	-1.1	4.1	3.7	-6.9	-97.3263
旅游R&D全时当量A15	3.63126	1.71247	0.845652	1.18899	0.726039	0.979132	0.982406	0.180675	0.360537	1.08902	0.157929	万人
旅游R&D经费占比A16	7.18322	0	2.77365	5.96327	0	5.03	0	2.0822	1.96703	3.27558	2.2247	%
人均GDP增速B1	2.34544	5.63894	7.3	6.3	7.1	6.6	4.7	6.1	6	7.1	7.3	%（常住人口）
人口自然增长率B2	6.3	1.83	7.1	1.75	1.88	1.06	5.69	3.56	-1.57	4.24	5.39	%
城镇化水平B3	77.4	72.9	70	66	64.1	66.6	67.7	58	68.1	63	61.5	%（常住人口）
废水排放总量B4	94593	78458.1	55830	41392	22519.3	46935	49567	18312	6398	37745	12145	万吨
SO2排放总量B5	17474	19488	7470	18885	18801	11750.8	12194	12648	1700	8004	7684	吨
固体废弃物排放量B6	0	0	0	0	0	0	0	0	0	0	0	万吨
森林覆盖率B7	66.84	47.7	60.03		48.4	55.2	61.4	71.5	50.7	61.6	81.7	%
绿地园林面积B8	48333	35008	13887	16420	10964	14848	18623	5303	14490	13151	5112	公顷					温州市统计年鉴有各个市的绿地面积
人均公园绿地面积B9	13.58	12.45	12.89	14.9	17	14.28	11.74	14.4	18	16.2	12.83	㎡
人均水资源总量B10	1491.29	811.997	1388.83	772.45	1726.39	1188.07	1049.28	3650.44	591.032	1270.13	6059.94	m³（常住人口）
人均耕地面积B11	0.0159985	0.0241345	0.0292388	0.0393039	0.0305813	0.0275345	0.0297755	0.0407213	0.015069	0.0327816	0.0647322	公顷（户籍人口）					没有找到明确数据的就使用第三次全国国土调查的数据
人均林地面积B12	0.15239	0.0682748	0.0817023	0.00453605	0.0867394	0.0877479	0.132144	0.219795	0.0650744	0.0892579	0.542628	公顷（户籍人口）					没有找到明确数据的就使用第三次全国国土调查的数据
城镇生活污水处理率B13	95.9	95.3	95.5	93.53	97.4	95.6	95.8	96.35	94.8	95.7	96.32	%
生活垃圾无害化处理率B14	100	100	100	100	100	100	100	100	100	100	100	%
固体废物综合利用率B15	87.03	98.18	98.5	99.2	99.65	93.39	97.73	99.3	86.4	95.41	94.54	%（工业）
环保支出占GDP比重B16	0.266486	0.276954	0.155174	0.428573	0.768277	0.273773	0.300715	0.970365	0.385054	0.383411	0.717733	%
环保支出	36	29.76	9.32	20.88	20.89	14.83	12.33	14.27	5.07	18.69	10.01	亿元					温州市统计年鉴有各个市的环境保护支出
旅游总收入	3589.1	2005.7	1334.4	1231.44	1249.28	1184	1350.88	532.18	942.2	1302.23	667.88			15389.3
一般财政支出	1717.08	1594.1	874.14	588.87	397.54	556.65	574	355.94	308.49	653.75	432.02						温州市统计年鉴有各个市的地方财政一般预算支出
旅游R&D经费支出	123.342	0	24.2456	35.1159	0	27.9995	0	7.41139	6.06809	21.4141	9.61113
R&D经费支出															398.84		https://www.stats.gov.cn/sj/tjgb/rdpcgb/qgkjjftrtjgb/202302/t20230206_1902124.html 温州市统计年鉴有各个市的R&D经费支出
2009（占浙江的比重）												%
2009												亿元
2018	464.25		109.13	138.93		128.1		20.48	8.48	80.16	20.07
R&D全时当量												万人年		45.8038
2009（占浙江的比重）	29.84	20.03	8.31	10.27	3.45	9.78	6.51	1.09	1.1	8.9	0.72	%
2018	13.6679	9.1745	3.80629	4.70405	1.58023	4.47961	2.98183	0.499261	0.503842	4.07654	0.329787	万人年					https://www.stats.gov.cn/zt_18555/ztsj/kjndsj/kj2010/202303/t20230303_1925198.html
GDP																	温州市统计年鉴有各个市地区生产总值
2017												亿元
2018	13509.1	10745.5	6006.16	4871.98	2719.07	5416.9	4100.23	1470.58	1316.7	4874.67	1394.67
常住人口数
2017												万人
2018	980.6	820.2	925	472.6	302.7	503.5	560.4	220.9	117.3	613.9	219.9
人均GDP
2017	13.4607	12.4017										万元/人
2018	13.7764	13.101
耕地面积			363.47							297.69		万亩		2961.9			没有找到明确数据的就使用第三次全国国土调查的数据
	12.3845	14.5522	24.2313	14.1667	8.16705	12.3137	14.5593	10.5012	1.46018	19.846	17.49	万公顷
林地面积	1769.48										2199.19	万亩		8449.9			没有找到明确数据的就使用第三次全国国土调查的数据
	117.965	41.167	67.71	1.63497	23.1646	39.2417	64.6142	56.6807	6.30571	54.0368	146.613	万公顷
森林面积
土地面积	16853	9816	12110	4223	5820	8279	10942	8845	1459	10050	17275	平方公里
公园绿地面积							4041					公顷					温州市统计年鉴有各个市的公园绿地面积
户籍人口	774.1	602.96	828.74	360.44	267.06	447.21	488.97	257.88	96.9	605.4	270.19	万人
固体废物产生量	526.15	1248.99	360.76		246.036					413.49		万吨
固体废物综合利用量	459.51	1229.13	355.3							394.64
固体废物贮存量		4.19	1.28							0.59
固体废物处置量	68.87	19.52	4.18							18.56
水资源总量	1462357	666000	1284668	365060	522577	598192	588018	806382	69328	779732	1332581	万立方米					温州市统计年鉴有各个市的水资源总量
国内旅游收入												亿元
2017		1649.1	1103.7	1010.84	1075.9
旅游外汇收入												亿美元
2017	35.43	9.9	6.9	2.26	4.1
国内游客接待量												万人次
2017	15884.4	11000	10237	9143.29	10552.6						6785.36
入境游客接待量
2017	402.23	186.9	139	71.52	105.7						37.91
废水排放总量包括生产废水和生活污水
数据来源：	各市统计年鉴
	国民经济和社会发展统计公报【户籍人口，水资源，耕地面积，林地面积，森林覆盖率，人均公园绿地面积】
	旅游概览
	水资源公报【水资源总量，人均拥有水资源量】
	环境状况公报/环境质量概要【GDP，污染物排放状况：二氧化硫排放总量、废水排放总量，污染治理投资，（工业）固体废物：综合利用率、排放量，城镇生活污水集中处理率，生活垃圾无害化处理率，水资源，农用地：耕地面积、林地面积，森林覆盖率】
	土地利用总体规划
	第x次全国国土调查主要数据公报
	森林资源与生态状况公报（林地面积、森林覆盖率）
	R&D普查公报（https://www.stats.gov.cn/sj/tjgb/rdpcgb/）
	中国科技统计年鉴【R&D全时当量、(&D经费内部支出】
	城市建设状况公报【人均公园绿地面积】
	固体废物污染环境防治信息公告【一般工业固体废物】
	土地利用现状情况
	浙江省2022年土地利用变化情况【各个市的土地利用情况】
	中华人民共和国文化和旅游部2018年文化和旅游发展统计公报
	https://www.ceicdata.com.cn/zh-hans/china/starrated-hotel-zhejiang【星级饭店从业人数】
	2018年度全国星级饭店统计报告【全国/省/市星级饭店数量、营业收入】
	https://www.ceicdata.com.cn/zh-hans/china/tourism-industry-overview/cn-travel-agency-number-of-employee【旅行社从业人数】

## Sheet: 2022年
	杭州市	宁波市	温州市	嘉兴市	湖州市	绍兴市	金华市	衢州市	舟山市	台州市	丽水市	单位	浙江省占全国（2022年）	浙江省（2022年）	浙江省（2009年）	全国（2022）	备注
国内旅游收入A1	1385.9	775.617	723	427.07	458.729	357.5	654.196	179.6	172.05	460.671	282.809	亿元	0.293235	5982		20400	温州市统计年鉴有各个市的
旅游外汇收入A2	0.4854	0.09902	0.0374	0.2524	0.0857	0.0136	0.1863	0.0013	0.0391	0.0146	0.0021	亿美元		1.217
国内游客接待量A3	8096	5083.6	4687	2999.3	2839.7	2543.1	3830	1209	1112	3114	2294	万人次		37465
入境游客接待量A4	9.6418	3.2467	0.6279	1.7447	1.6681	0.3428	3.3277	0.0448	0.9254	0.4275	0.0669			22.06
旅行社营业收入A5	37.4265	20.9456	19.5247	11.5331	12.388	9.65432	17.6666	4.85011	4.64624	12.4405	7.63728	亿元		161.544		1601.56
星级酒店营业收入A6	29.91	12.13	15.87	7.80752	8.38631	6.53567	11.9598	3.28338	3.14536	8.4218	5.1702			112.62		1177.68
旅行社数量A7	1000	390	358.324	211.659	227.35	174	324.224	89.0111	85.2694	181	140.162	家		3181		32603
星级酒店数量A8	97	75	50	25.2996	24	36	38.7546	32	10.1923	32	16.7536			437		7337	温州市统计年鉴有各个市的星级饭店数
旅行社职工人数A9	2.24215	0.874438	0.803416	0.474571	0.509752	0.390134	0.726959	0.199576	0.191187	0.405829	0.314264	万人		7.13227		24.3227
星级酒店从业人员A10	1.11	0.54	0.63	0.278884	0.264558	0.396837	0.427201	0.352744	0.112352	0.352744	0.184679			4.65		764.28
国内旅游收入增长率A11	-8.72028	-5.3	10.0792	-12.9	-6.1	-6.1	-4.07679	1.25726	1.29717	8.83132	-1.92547	%
旅游外汇收入增长率A12	-42.3529	-29.2714	-0.209302	-14	-52.203	-51.773	-25.4036	-38.9671	-69.7674	-86.2198	-16
国内游客数量增长率A13	-9.3799	-1.4	-5.43921	-6.7	-7.8	-7.8	-11.4778	-15.8734	-10.4398	-13.4907	-10.2504
入境游客数量增长率A14	-46.9204	-32.3604	-47.675	-49	-60.4143	-52.1127	-33.446	-42.268	-67.0254	-83.3836	-25.6667
旅游R&D全时当量A15	1.14759	0.635712	0.583645	0.367117	0.418744	0.250529	0.576258	0.10312	0.0415107	0.429421	0.186901	万人
旅游R&D经费占比A16	1.96865	1.04153	1.65771	1.78651	2.51495	1.3358	1.93924	0.714737	1.0199	1.42128	1.01517	%
人均GDP增速B1	1.8224	6.48965	3.2	1.2	2.7	3.8	2	4.5	13.9983	3.99936	3.9	%（常住人口）
人口自然增长率B2	2.46	-1.25	0	0.2	-1.4	-1.8	-0.38	-1.82	-4.64	-1.34	-1.19	%
城镇化水平B3	84	78.9	73.7	72.4	66.4	72.1	69.4	59.3	73.2	63.9	63.5	%（常住人口）
废水排放总量B4	13407.4	59227.4			20164	48961	6833.04	8010.34	7652		2474.14	万吨		433723
SO2排放总量B5	3223.24	8016.32	3337.1	4509.6	3767.69	4138.36	3121.8	3385.55	1556.1	3831.2	764.8	吨
固体废弃物排放量B6	0	0	0	0	0	0	0	0	0	0	0	万吨
森林覆盖率B7	65.33	44.67	60.73		47.55	46.97	61.53	69.26	42.94	58.78	79.9	%
绿地园林面积B8	55881	38963	18068	17531	11910	18569	20803	6000	14989	14290	5809	公顷					温州市统计年鉴有各个市的绿地面积
人均公园绿地面积B9	12.7	14.6	13.03	16.18	17.46	15.95	13.68	16.15	16.12	15.08	14.69	㎡
人均水资源总量B10	1034.91	979.4	1098	451	1011	1229.61	1199.09	4996	745.9	1361	7970.6	m³（常住人口）
人均耕地面积B11	0.0148922	0.0235196	0.0185978	0.0404446	0.031244	0.0271156	0.0298334	0.0421833	0.0152699	0.0214905	0.0450056	公顷（户籍人口）
人均林地面积B12	0.129235	0.065823	0.0883653	0.00461696	0.0861238	0.0878965	0.129309	0.221671	0.0658965	0.0891831	0.513875	公顷（户籍人口）
城镇生活污水处理率B13	97.54	99.6	97.46	98.31	98.5	97.59	97.9	97.39	91.9	98.02	98.5	%
生活垃圾无害化处理率B14	100	100	100	100	100	100	100	100	100	100	100	%
固体废物综合利用率B15	98.91	99.7063	99.6099	99.8469	99.99	98.96	99.61	98.39	99.9371	99.431	99.72	%（工业）
环保支出占GDP比重B16	0.209217	0.198912	0.237934	0.30051	0.51286	0.160643	0.244002	0.592381	0.2098	0.575507	0.587744	%
环保支出	39.23	31.24	19.11	20.25	19.75	11.81	13.57	11.87	4.09	34.77	10.76	亿元					温州市统计年鉴有各个市的环境保护支出
旅游总收入	1298	776.3	723.252	428.77	459.306	357.6	655.449	179.609	172.313	460.769	282.823		#DIV/0!	5794.19
一般财政支出	2542.09	2187.81	1137.74	827.71	601.92	804.86	830.4	567.7	354.27	834.93	607.1						温州市统计年鉴有各个市的地方财政一般预算支出
旅游R&D经费支出	50.0449	22.7868	18.8604	14.7871	15.138	10.7514	16.1034	4.05756	3.61319	11.8667	6.1631
R&D经费支出															398.84		https://www.stats.gov.cn/sj/tjgb/rdpcgb/qgkjjftrtjgb/202302/t20230206_1902124.html 温州市统计年鉴有各个市的R&D经费支出
2009（占浙江的比重）												%
2009												亿元
2022	723.03	460.96	209.4	232.41	126.89	221.01	136.65	45.25	40.91	155.58	39.9
R&D全时当量												万人年
2009（占浙江的比重）												%
2022	16.58	12.86	6.48	5.77	3.51	5.15	4.89	1.15	0.47	5.63	1.21	万人年					https://www.stats.gov.cn/zt_18555/ztsj/kjndsj/kj2010/202303/t20230303_1925198.html
GDP																	温州市统计年鉴有各个市地区生产总值
2021	18109	14595										亿元
2022	18753	15704	8030	6739	3850	7351	5562	2003	1951	6041	1831
常住人口数
2021	1220.4	954.4										万人
2022	1237.6	961.8				535.3
人均GDP
2021	14.9857	15.3922							146611	87089		万元/人
2022	15.2588	16.3911							167134	90572
耕地面积（水田+旱地）		219.11		227.41	125.99	181.33	222.35	161.37	21.81	195.01		万亩
	12.61	14.6073	15.47	15.1607	8.39933	12.0887	14.8233	10.758	1.454	13.0007	12.12	万公顷		130.48
林地面积		613.21	1102.56	25.96	347.29	587.79	961.94	847.99	94.12	809.27	2075.8	万亩
	109.43	40.8807	73.504	1.73067	23.1527	39.186	64.25	56.5327	6.27467	53.9513	138.387	万公顷		607.04
森林面积
土地面积												平方公里
公园绿地面积												公顷					温州市统计年鉴有各个市的公园绿地面积
户籍人口	846.75	621.07	831.82	374.85	268.83	445.82	496.87	255.03	95.22	604.95	269.3	万人
固体废物产生量	559.35	1403.94	497.29	614.01	288.57	419.31	345.18	404.27	272.385	528.16	170.9	万吨
固体废物综合利用量	557.99	1399.89	495.35	613.07	288.61	418.68	343.91	398.83	272.214
固体废物贮存量		0.17	0.52	0.6	0.0178	1.67	1.23	3.1	0.24	0.34
固体废物处置量	4.34	4.02	1.99	1.29	0.0043	2.82	0.92	3.83	0.232
水资源总量	1280800		1062000	250100	345000	658211		1143100			2004600	万立方米					温州市统计年鉴有各个市的水资源总量
国内旅游收入												亿元
2021			656.8		535.21		682	177.37
旅游外汇收入												亿美元
2021		0.14	0.04729		0.1793		0.249744	0.00213
国内游客接待量												万人次
2021			4956.6		3631.5		4326.6	1437.12			2556
入境游客接待量
2021		4.8	1.2		4.2139		5	0.0776			0.09
废水排放总量包括生产废水和生活污水
数据来源：	各市统计年鉴
	省/市国民经济和社会发展统计公报【户籍人口，水资源，耕地面积，林地面积，森林覆盖率，人均公园绿地面积】
	旅游概览
	水资源公报【水资源总量，人均拥有水资源量】
	环境状况公报/环境质量概要【GDP，污染物排放状况：二氧化硫排放总量、废水排放总量，污染治理投资，（工业）固体废物：综合利用率、排放量，城镇生活污水集中处理率，生活垃圾无害化处理率，水资源，农用地：耕地面积、林地面积，森林覆盖率】
	土地利用总体规划
	第x次全国国土调查主要数据公报
	森林资源与生态状况公报（林地面积、森林覆盖率）
	R&D普查公报（https://www.stats.gov.cn/sj/tjgb/rdpcgb/）
	中国科技统计年鉴【R&D全时当量、R&D经费内部支出】
	城市建设状况公报【人均公园绿地面积】
	固体废物污染环境防治信息公告【一般工业固体废物】
	土地利用现状情况
	浙江省2022年土地利用变化情况【各个市的土地利用情况】
	中华人民共和国文化和旅游部2022年文化和旅游发展统计公报
	https://www.ceicdata.com.cn/zh-hans/china/starrated-hotel-zhejiang【星级饭店从业人数】
	2022年度全国旅行社统计调查报告
