# Supplementary material for: Spatiotemporal Evolution Characteristics and Obstacle Factors of the Coordinated Development between the Tourism Industry and Ecological Security
Source: Research Square preprint supplement (doi:10.21203/rs.3.rs-6613050/v1), 2025-06-18
Supplement: Supplementary file 2 [file 熵值法耦合协调障碍度.xlsx]

## Sheet: 省级熵值法旅游产业数据
浙江省 指标层	国内旅游收入A1	旅游外汇收入A2	国内游客接待量A3	入境游客接待量A4	旅行社营业收入A5	星级酒店营业收入A6	旅行社数量A7	星级酒店数量A8	旅行社职工人数A9	星级酒店从业人员A10	国内旅游收入增长率A11	旅游外汇收入增长率A12	国内游客数量增长率A13	入境游客数量增长率A14	旅游R&D全时当量A15	旅游R&D经费占比A16
单位	亿元	亿美元	万人		亿元		家		万人		%				万人	%
year	x1	x2	x3	x4	x5	x6	x7	x8	x9	x10	x11	x12	x13	x14	x15	x16
2008年	2040	30.2408	20900	539.67	129.647	186.681	1413	1080	2.3168	14.7425	12.0879	11.6634	9.42408	5.57325	1.67113	1.63021
2009年	2424	32.2358	24400	570.6	145.61	189.487	1509	1096	2.2989	14.4755	18.824	6.597	16.794	5.7388	2.14314	1.69401
2010年	3046	39.302	29500	684.71	205.669	225.731	1639	1046	2.2202	11.0587	25.66	21.92	20.852	19.99	2.71904	1.87941
2011年	3785	45.4173	34300	773.69	236.912	223.274	1860	991	2.4094	8.9162	24.2613	15.5598	16.2542	12.9954	3.23475	2.03877
2012年	4476	51.5174	39100	865.93	259.976	204.098	2012	958	2.648	11.3701	18.256	13.431	14.081	11.922	3.85847	2.35337
2013年	5202	53.9293	43400	866.28	240.856	207.633	2102	935	2.7543	11.887	16.2198	4.682	11.029	0.041	4.5835	2.57463
2014年	5947	57.5348	47700	931.03	256.671	220.252	2160	831	2.7607	10.7453	14.321	6.686	10.212	7.474	5.31017	2.85767
2015年	6720	67.8847	53500	1012	258.53	200.411	2461	765	2.4066	9.8288	12.998	17.989	9.727	8.701	6.07113	2.50285
2016年	7600	74.3063	58400	1120.3	543.979	194.806	2105	686	2.7889	9.5109	13.095	9.4596	9.076	10.698	6.55575	2.8198
2017年	8764	82.76	64100	1211.73	473.392	186.569	2161	604	2.7244	8.7567	15.315	11.376	9.717	8.161	7.1693	3.00849
2018年	9834	25.9579	69000	456.8	402.805	187.463	2769	575	2.91505	8.041	12.209	-68.634	8.777	37.694	8.15547	2.92196
2019年	10727	26.6823	73000	467.1	332.217	160.594	2769	528	3.1057	7.3452	9.08	2.79	5.547	2.267	9.35715	2.8219
2020年	8264	1.6367	57000	38.35	132.386	120.613	2896	533	2.6586	5.8832	-22.96	-93.865	-21.06	-91.79	7.46625	2.29815
2021年	6772	2.0424	41000	42.84	167.373	123.236	3014	473	2.4121	5.1959	-25.326	24.787	-28.07	11.72	5.29928	1.78261
2022年	5982	1.217	37465	22.06	161.545	112.62	3181	437	2.1656	4.6542	-11.666	-40.413	-7.317	-48.506	4.94381	1.50325
MAX	10727	82.76	73000	1211.73	543.979	225.731	3181	1096	3.1057	14.7425	25.66	24.787	20.852	37.694	9.35715	3.00849
MIN	2040	1.217	20900	22.06	129.647	112.62	1413	437	2.1656	4.6542	-25.326	-93.865	-28.07	-91.79	1.67113	1.50325
最大值和最小值之差	8687	81.543	52100	1189.67	414.332	113.111	1768	659	0.9401	10.0883	50.986	118.652	48.922	129.484	7.68601	1.50524
标准化
year	x1	x2	x3	x4	x5	x6	x7	x8	x9	x10	x11	x12	x13	x14	x15	x16
2008年	0	0.355932	0	0.435087	0	0.654758	0	0.975721	0.160834	1	0.733807	0.889394	0.766405	0.751933	0	0.0843459
2009年	0.044204	0.380398	0.0671785	0.461086	0.0385269	0.67957	0.0542986	1	0.141793	0.973534	0.865924	0.846695	0.917052	0.753211	0.0614114	0.126729
2010年	0.115805	0.467054	0.165067	0.557003	0.183481	1	0.127828	0.924127	0.0580789	0.634844	1	0.975837	1	0.863273	0.136339	0.249901
2011年	0.200875	0.542049	0.257198	0.631797	0.258887	0.978274	0.252828	0.840668	0.259334	0.42247	0.972567	0.922233	0.906018	0.809254	0.203436	0.355773
2012年	0.280419	0.616857	0.349328	0.709331	0.314553	0.808746	0.338801	0.790592	0.513137	0.665712	0.854784	0.904292	0.861596	0.800964	0.284586	0.564774
2013年	0.363992	0.646436	0.431862	0.709625	0.268405	0.839993	0.389706	0.75569	0.62621	0.716949	0.814847	0.830555	0.799211	0.709207	0.378917	0.711765
2014年	0.449753	0.690652	0.514395	0.764052	0.306576	0.951562	0.422511	0.597876	0.633018	0.603779	0.777606	0.847445	0.782511	0.766612	0.473462	0.899802
2015年	0.538736	0.817577	0.62572	0.832113	0.311063	0.776151	0.59276	0.497724	0.256356	0.512931	0.751657	0.942706	0.772597	0.776088	0.572468	0.664078
2016年	0.640037	0.896328	0.71977	0.923147	1	0.726598	0.391403	0.377845	0.663015	0.481419	0.75356	0.870821	0.75929	0.791511	0.63552	0.874645
2017年	0.77403	1	0.829175	1	0.829636	0.653768	0.423077	0.253414	0.594405	0.406659	0.797101	0.886972	0.772393	0.771918	0.715347	1
2018年	0.897203	0.303409	0.923225	0.365429	0.659273	0.661679	0.766968	0.209408	0.797202	0.335716	0.736182	0.212647	0.753179	1	0.843653	0.942513
2019年	1	0.312293	1	0.374087	0.488909	0.424127	0.766968	0.138088	1	0.266745	0.674813	0.814609	0.687155	0.726399	1	0.876037
2020年	0.716473	0.00514698	0.692898	0.0136929	0.0066112	0.0706676	0.838801	0.145675	0.524412	0.121824	0.0464049	0	0.143289	0	0.753982	0.52809
2021年	0.544722	0.0101223	0.385797	0.017467	0.0910517	0.0938527	0.905543	0.0546282	0.262206	0.0536959	0	1	0	0.799404	0.472045	0.185591
2022年	0.453782	0	0.317946	0	0.0769859	0	1	0	0	0	0.267917	0.450494	0.424206	0.334281	0.425796	0
平移
year	x1	x2	x3	x4	x5	x6	x7	x8	x9	x10	x11	x12	x13	x14	x15	x16
2008年	0.0001	0.356032	0.0001	0.435187	0.0001	0.654858	0.0001	0.975821	0.160934	1.0001	0.733907	0.889494	0.766505	0.752033	0.0001	0.0844459
2009年	0.044304	0.380498	0.0672785	0.461186	0.0386269	0.67967	0.0543986	1.0001	0.141893	0.973634	0.866024	0.846795	0.917152	0.753311	0.0615114	0.126829
2010年	0.115905	0.467154	0.165167	0.557103	0.183581	1.0001	0.127928	0.924227	0.0581789	0.634944	1.0001	0.975937	1.0001	0.863373	0.136439	0.250001
2011年	0.200975	0.542149	0.257298	0.631897	0.258987	0.978374	0.252928	0.840768	0.259434	0.42257	0.972667	0.922333	0.906118	0.809354	0.203536	0.355873
2012年	0.280519	0.616957	0.349428	0.709431	0.314653	0.808846	0.338901	0.790692	0.513237	0.665812	0.854884	0.904392	0.861696	0.801064	0.284686	0.564874
2013年	0.364092	0.646536	0.431962	0.709725	0.268505	0.840093	0.389806	0.75579	0.62631	0.717049	0.814947	0.830655	0.799311	0.709307	0.379017	0.711865
2014年	0.449853	0.690752	0.514495	0.764152	0.306676	0.951662	0.422611	0.597976	0.633118	0.603879	0.777706	0.847545	0.782611	0.766712	0.473562	0.899902
2015年	0.538836	0.817677	0.62582	0.832213	0.311163	0.776251	0.59286	0.497824	0.256456	0.513031	0.751757	0.942806	0.772697	0.776188	0.572568	0.664178
2016年	0.640137	0.896428	0.71987	0.923247	1.0001	0.726698	0.391503	0.377945	0.663115	0.481519	0.75366	0.870921	0.75939	0.791611	0.63562	0.874745
2017年	0.77413	1.0001	0.829275	1.0001	0.829736	0.653868	0.423177	0.253514	0.594505	0.406759	0.797201	0.887072	0.772493	0.772018	0.715447	1.0001
2018年	0.897303	0.303509	0.923325	0.365529	0.659373	0.661779	0.767068	0.209508	0.797302	0.335816	0.736282	0.212747	0.753279	1.0001	0.843753	0.942613
2019年	1.0001	0.312393	1.0001	0.374187	0.489009	0.424227	0.767068	0.138188	1.0001	0.266845	0.674913	0.814709	0.687255	0.726499	1.0001	0.876137
2020年	0.716573	0.00524698	0.692998	0.0137929	0.0067112	0.0707676	0.838901	0.145775	0.524512	0.121924	0.0465049	0.0001	0.143389	0.0001	0.754082	0.52819
2021年	0.544822	0.0102223	0.385897	0.017567	0.0911517	0.0939527	0.905643	0.0547282	0.262306	0.0537959	0.0001	1.0001	0.0001	0.799504	0.472145	0.185691
2022年	0.453882	0.0001	0.318046	0.0001	0.0770859	0.0001	1.0001	0.0001	0.0001	0.0001	0.268017	0.450594	0.424306	0.334381	0.425896	0.0001
sum	7.02153	7.04576	7.28106	7.79542	4.83546	9.32125	7.27299	7.56296	6.4915	7.19778	10.0487	11.3962	10.3464	10.6556	6.95846	8.06554
Pij
year	x1	x2	x3	x4	x5	x6	x7	x8	x9	x10	x11	x12	x13	x14	x15	x16
2008年	1.42419e-05	0.0505315	1.37343e-05	0.055826	2.06806e-05	0.0702543	1.37495e-05	0.129026	0.0247915	0.138946	0.0730353	0.0780518	0.0740842	0.0705766	1.4371e-05	0.01047
2009年	0.00630973	0.0540039	0.00924021	0.0591611	0.00798826	0.0729162	0.00747954	0.132237	0.0218583	0.135269	0.0861829	0.074305	0.0886445	0.0706966	0.0088398	0.0157248
2010年	0.0165071	0.0663029	0.0226845	0.0714655	0.0379655	0.107293	0.0175895	0.122205	0.00896232	0.0882139	0.0995256	0.0856371	0.0966616	0.0810256	0.0196077	0.0309962
2011年	0.0286227	0.0769469	0.035338	0.0810601	0.0535601	0.104962	0.0347763	0.111169	0.0399652	0.0587083	0.0967956	0.0809334	0.0875781	0.075956	0.0292502	0.0441226
2012年	0.0399513	0.0875644	0.0479914	0.0910062	0.065072	0.0867744	0.0465972	0.104548	0.0790629	0.0925024	0.0850743	0.0793591	0.0832846	0.0751781	0.0409122	0.0700354
2013年	0.0518537	0.0917624	0.0593268	0.0910439	0.0555283	0.0901267	0.0535963	0.0999332	0.0964815	0.0996209	0.0811	0.0728888	0.077255	0.0665669	0.0544685	0.08826
2014年	0.0640676	0.098038	0.0706622	0.0980258	0.0634223	0.102096	0.0581069	0.0790664	0.0975303	0.0838979	0.0773939	0.0743708	0.0756409	0.0719542	0.0680556	0.111574
2015年	0.0767405	0.116052	0.0859518	0.106757	0.0643503	0.0832775	0.0815153	0.065824	0.0395064	0.0712763	0.0748116	0.0827299	0.0746827	0.0728435	0.0822837	0.0823475
2016年	0.0911677	0.12723	0.0988688	0.118435	0.206826	0.0779615	0.0538297	0.0499732	0.102151	0.0668983	0.075001	0.076422	0.0733966	0.0742909	0.0913448	0.108455
2017年	0.110251	0.141944	0.113895	0.128293	0.171594	0.0701482	0.0581847	0.0335205	0.091582	0.0565118	0.079334	0.0778393	0.0746629	0.0724522	0.102817	0.123997
2018年	0.127793	0.0430769	0.126812	0.0468902	0.136362	0.0709969	0.105468	0.0277019	0.122823	0.0466555	0.0732716	0.0186682	0.0728058	0.0938572	0.121256	0.116869
2019年	0.142433	0.0443377	0.137356	0.0480009	0.10113	0.0455119	0.105468	0.0182717	0.154063	0.0370732	0.0671644	0.0714895	0.0664245	0.0681803	0.143724	0.108627
2020年	0.102054	0.000744701	0.0951782	0.00176936	0.00138791	0.00759207	0.115345	0.0192749	0.0807998	0.0169392	0.00462797	8.77486e-06	0.0138589	9.38478e-06	0.108369	0.0654872
2021年	0.0775931	0.00145084	0.0530001	0.00225351	0.0188507	0.0100794	0.124521	0.00723635	0.0404076	0.00747396	9.95157e-06	0.0877573	9.6652e-06	0.0750317	0.067852	0.0230228
2022年	0.0646414	1.41929e-05	0.0436813	1.2828e-05	0.0159418	1.07282e-05	0.137509	1.32223e-05	1.54048e-05	1.38932e-05	0.0266719	0.039539	0.04101	0.0313809	0.0612055	1.23984e-05
K	-0.369269
ej	x1	x2	x3	x4	x5	x6	x7	x8	x9	x10	x11	x12	x13	x14	x15	x16
	0.910989	0.89505	0.918004	0.906131	0.846111	0.930489	0.913079	0.896132	0.90761	0.917963	0.94285	0.95903	0.955414	0.967646	0.916348	0.910773
dj	0.0890108	0.10495	0.0819963	0.0938694	0.153889	0.0695111	0.086921	0.103868	0.0923903	0.0820374	0.0571502	0.0409697	0.0445859	0.0323537	0.0836517	0.0892274
W	0.0681354	0.0803361	0.062766	0.0718545	0.117798	0.0532088	0.0665357	0.0795085	0.0707222	0.0627974	0.043747	0.0313612	0.0341293	0.0247659	0.0640331	0.0683012
线性加权法
year	x1	x2	x3	x4	x5	x6	x7	x8	x9	x10	x11	x12	x13	x14	x15	x16	score
2008年	0	0.0285942	0	0.031263	0	0.0348389	0	0.0775781	0.0113745	0.0627974	0.0321018	0.0278925	0.0261569	0.0186223	0	0.00576093	0.356981
2009年	0.00301186	0.0305597	0.00421652	0.0331311	0.00453839	0.0361591	0.0036128	0.0795085	0.0100279	0.0611354	0.0378815	0.0265534	0.0312984	0.0186539	0.00393236	0.00865572	0.392877
2010年	0.00789043	0.0375213	0.0103606	0.0400232	0.0216136	0.0532088	0.00850512	0.073476	0.00410747	0.0398666	0.043747	0.0306034	0.0341293	0.0213797	0.00873023	0.0170685	0.452231
2011年	0.0136867	0.0435461	0.0161433	0.0453975	0.0304964	0.0520529	0.0168221	0.0668402	0.0183407	0.02653	0.0425468	0.0289224	0.0309218	0.0200419	0.0130266	0.0242997	0.489615
2012年	0.0191065	0.0495559	0.0219259	0.0509686	0.0370536	0.0430324	0.0225423	0.0628587	0.0362902	0.041805	0.0373942	0.0283597	0.0294057	0.0198366	0.0182229	0.0385747	0.556933
2013年	0.0248007	0.0519321	0.0271062	0.0509898	0.0316175	0.0446951	0.0259293	0.0600838	0.044287	0.0450226	0.0356471	0.0260472	0.0272765	0.0175641	0.0242632	0.0486144	0.585877
2014年	0.0306441	0.0554842	0.0322865	0.0549006	0.036114	0.0506315	0.0281121	0.0475362	0.0447684	0.0379157	0.0340179	0.0265769	0.0267066	0.0189858	0.0303172	0.0614576	0.616455
2015年	0.036707	0.0656809	0.0392739	0.0597911	0.0366426	0.0412981	0.0394397	0.0395733	0.01813	0.0322107	0.0328827	0.0295644	0.0263682	0.0192205	0.0366569	0.0453573	0.598797
2016年	0.0436092	0.0720075	0.045177	0.0663323	0.117798	0.0386615	0.0260422	0.0300419	0.0468899	0.0302319	0.0329659	0.02731	0.0259141	0.0196024	0.0406943	0.0597393	0.723017
2017年	0.0527388	0.0803361	0.052044	0.0718545	0.0977293	0.0347863	0.0281497	0.0201486	0.0420376	0.0255371	0.0348707	0.0278165	0.0263612	0.0191172	0.0458059	0.0683012	0.727635
2018年	0.0611313	0.0243747	0.0579471	0.0262577	0.0776609	0.0352072	0.0510307	0.0166497	0.0563799	0.0210821	0.0322057	0.00666887	0.0257055	0.0247659	0.0540217	0.0643747	0.635464
2019年	0.0681354	0.0250884	0.062766	0.0268798	0.0575924	0.0225673	0.0510307	0.0109792	0.0707222	0.0167509	0.029521	0.0255471	0.0234521	0.0179899	0.0640331	0.0598343	0.63289
2020年	0.0488172	0.000413488	0.0434904	0.000983895	0.000778784	0.00376014	0.0558102	0.0115824	0.0370876	0.00765025	0.00203007	0	0.00489037	0	0.0482798	0.0360692	0.301644
2021年	0.0371148	0.000813183	0.0242149	0.00125508	0.0107257	0.00499379	0.0602509	0.00434341	0.0185438	0.00337196	0	0.0313612	0	0.0197979	0.0302265	0.0126761	0.259689
2022年	0.0309186	0	0.0199562	0	0.00906877	0	0.0665357	0	0	0	0.0117205	0.014128	0.0144779	0.00827875	0.0272651	0	0.202349

## Sheet: 省级熵值法生态安全数据
year	x1	x2	x3	x4	x5	x6	x7	x8	x9	x10	x11	x12	x13	x14	x15	x16
2008年	12.64	4.58	29.768	350377	715900	1.67	60.65	69621	9.6	1824.35	0.56	0.13	75.1	86.41	92.19	2.42
2009年	6.044	4.63	30.405	365017	677000	0.78	60.65	74362	10.76	1974.8	0.37	0.13	78.88	95.36	91.55	2.26
2010年	17.378	4.99	30.938	422618	665000	2.54	60.58	79459	11.05	2943.61	0.36	0.12	82.74	96.32	82.07	1.2
2011年	13.144	4.07	31.4115	420417	647000	0.34	60.58	105200	11.77	1556.5	0.36	0.12	85.09	94.91	91.07	0.74
2012年	5.652	4.6	31.705	420960	611000	0.4	60.58	122723	12.47	3010.39	0.54	0.12	87.5	97.81	90.45	1.08
2013年	6.56	4.56	64	419120	593000	0	60.82	127927	12.44	1928.57	0.54	0.12	89.28	99.4	93.24	1.04
2014年	5.32	5	64.87	418262	574000	0	60.91	132619	12.9	2326.92	0.45	0.12	90.68	100	92.75	1.18
2015年	6.864	5.02	65.8	433822	538000	0	60.96	138039	13.19	2883.26	0.54	0.12	91.95	99.2	92.55	1.03
2016年	6.97	5.7	67	430856	268000	0.28	61	154314	13.17	2692.32	0.53	0.12	93.89	100	89.34	1.38
2017年	9.221	6.36	68	453935	181000	0	61.17	159214	13.32	1806.01	0.52	0.12	94.98	100	89.85	0.87
2018年	8.898	5.44	68.9	463895	129000	0	61.15	167370	13.73	1733.14	0.52	0.12	95.75	100	92.11	1.18
2019年	5.942	4.99	70	476707	89000	0	61.15	172280	14.03	2622.31	0.33	0.11	96.95	100	93.8	0.43
2020年	1.992	4.99	72.17	412130	50000	0	61.17	179350	13.59	2025.25	0.3	0.1	97.69	100	98.51	0.34
2021年	12.204	1	72.7	437671	42000	0	61.24	183218	12.87	2638.91	0.3	0.1	97.92	100	99.35	0.27
2022年	2.2	0.04	73.4	433723	40000	0	61.27	189757	14.2	1828.13	0.3	0.1	98.14	100	99.42	0.29
MAX	17.378	6.36	73.4	476707	715900	2.54	61.27	189757	14.2	3010.39	0.56	0.13	98.14	100	99.42	2.42
MIN	1.992	0.04	29.768	350377	40000	0	60.58	69621	9.6	1556.5	0.3	0.1	75.1	86.41	82.07	0.27
最大值和最小值之差	15.386	6.32	43.632	126330	675900	2.54	0.69	120136	4.6	1453.89	0.26	0.03	23.04	13.59	17.35	2.15
标准化
year	x1	x2	x3	x4	x5	x6	x7	x8	x9	x10	x11	x12	x13	x14	x15	x16
2008年	0.692058	0.718354	0	1	0	0.34252	0.101449	0	0	0.18423	1	1	0	0	0.583285	1
2009年	0.263356	0.726266	0.0145994	0.884113	0.0575529	0.692913	0.101449	0.0394636	0.252174	0.287711	0.269231	1	0.164062	0.658572	0.546398	0.925581
2010年	1	0.783228	0.0268152	0.428156	0.075307	0	0	0.0818905	0.315217	0.954068	0.230769	0.666667	0.331597	0.729213	0	0.432558
2011年	0.724815	0.637658	0.0376673	0.445579	0.101938	0.866142	0	0.296156	0.471739	0	0.230769	0.666667	0.433594	0.62546	0.518732	0.218605
2012年	0.237879	0.721519	0.044394	0.441281	0.1552	0.84252	0	0.442016	0.623913	1	0.923077	0.666667	0.538194	0.838852	0.482997	0.376744
2013年	0.296893	0.71519	0.784562	0.455846	0.181832	1	0.347826	0.485333	0.617391	0.255913	0.923077	0.666667	0.615451	0.95585	0.643804	0.35814
2014年	0.216301	0.78481	0.804501	0.462638	0.209942	1	0.478261	0.524389	0.717391	0.529903	0.576923	0.666667	0.676215	1	0.615562	0.423256
2015年	0.316652	0.787975	0.825816	0.339468	0.263205	1	0.550725	0.569505	0.780435	0.912559	0.923077	0.666667	0.731337	0.941133	0.604035	0.353488
2016年	0.323541	0.89557	0.853319	0.362946	0.662672	0.889764	0.608696	0.704976	0.776087	0.781228	0.884615	0.666667	0.815538	1	0.41902	0.516279
2017年	0.469843	1	0.876238	0.180258	0.791389	1	0.855072	0.745763	0.808696	0.171615	0.846154	0.666667	0.862847	1	0.448415	0.27907
2018年	0.44885	0.85443	0.896865	0.101417	0.868324	1	0.826087	0.813653	0.897826	0.121495	0.846154	0.666667	0.896267	1	0.578674	0.423256
2019年	0.256727	0.783228	0.922076	0	0.927504	1	0.826087	0.854523	0.963043	0.733075	0.115385	0.333333	0.948351	1	0.676081	0.0744186
2020年	0	0.783228	0.97181	0.511177	0.985205	1	0.855072	0.913373	0.867391	0.322411	0	0	0.980469	1	0.94755	0.0325581
2021年	0.66372	0.151899	0.983957	0.309	0.997041	1	0.956522	0.94557	0.71087	0.744492	0	0	0.990451	1	0.995965	0
2022年	0.0135188	0	1	0.340252	1	1	1	1	1	0.18683	0	0	1	1	1	0.00930233
平移
year	x1	x2	x3	x4	x5	x6	x7	x8	x9	x10	x11	x12	x13	x14	x15	x16
2008年	0.692158	0.718454	0.0001	1.0001	0.0001	0.34262	0.101549	0.0001	0.0001	0.18433	1.0001	1.0001	0.0001	0.0001	0.583385	1.0001
2009年	0.263456	0.726366	0.0146994	0.884213	0.0576529	0.693013	0.101549	0.0395636	0.252274	0.287811	0.269331	1.0001	0.164162	0.658672	0.546498	0.925681
2010年	1.0001	0.783328	0.0269152	0.428256	0.075407	0.0001	0.0001	0.0819905	0.315317	0.954168	0.230869	0.666767	0.331697	0.729313	0.0001	0.432658
2011年	0.724915	0.637758	0.0377673	0.445679	0.102038	0.866242	0.0001	0.296256	0.471839	0.0001	0.230869	0.666767	0.433694	0.62556	0.518832	0.218705
2012年	0.237979	0.721619	0.044494	0.441381	0.1553	0.84262	0.0001	0.442116	0.624013	1.0001	0.923177	0.666767	0.538294	0.838952	0.483097	0.376844
2013年	0.296993	0.71529	0.784662	0.455946	0.181932	1.0001	0.347926	0.485433	0.617491	0.256013	0.923177	0.666767	0.615551	0.95595	0.643904	0.35824
2014年	0.216401	0.78491	0.804601	0.462738	0.210042	1.0001	0.478361	0.524489	0.717491	0.530003	0.577023	0.666767	0.676315	1.0001	0.615662	0.423356
2015年	0.316752	0.788075	0.825916	0.339568	0.263305	1.0001	0.550825	0.569605	0.780535	0.912659	0.923177	0.666767	0.731437	0.941233	0.604135	0.353588
2016年	0.323641	0.89567	0.853419	0.363046	0.662772	0.889864	0.608796	0.705076	0.776187	0.781328	0.884715	0.666767	0.815638	1.0001	0.41912	0.516379
2017年	0.469943	1.0001	0.876338	0.180358	0.791489	1.0001	0.855172	0.745863	0.808796	0.171715	0.846254	0.666767	0.862947	1.0001	0.448515	0.27917
2018年	0.44895	0.85453	0.896965	0.101517	0.868424	1.0001	0.826187	0.813753	0.897926	0.121595	0.846254	0.666767	0.896367	1.0001	0.578774	0.423356
2019年	0.256827	0.783328	0.922176	0.0001	0.927604	1.0001	0.826187	0.854623	0.963143	0.733175	0.115485	0.333433	0.948451	1.0001	0.676181	0.0745186
2020年	0.0001	0.783328	0.97191	0.511277	0.985305	1.0001	0.855172	0.913473	0.867491	0.322511	0.0001	0.0001	0.980569	1.0001	0.94765	0.0326581
2021年	0.66382	0.151999	0.984057	0.3091	0.997141	1.0001	0.956622	0.94567	0.71097	0.744592	0.0001	0.0001	0.990551	1.0001	0.996065	0.0001
2022年	0.0136188	0.0001	1.0001	0.340352	1.0001	1.0001	1.0001	1.0001	1.0001	0.18693	0.0001	0.0001	1.0001	1.0001	1.0001	0.00940233
sum	5.92565	10.3449	9.04412	6.26363	7.27861	12.6354	7.50875	8.41811	9.80367	7.18703	7.77073	8.33483	9.98588	12.7506	9.06202	5.42476
Pij
year	x1	x2	x3	x4	x5	x6	x7	x8	x9	x10	x11	x12	x13	x14	x15	x16
2008年	0.116807	0.0694504	1.10569e-05	0.159668	1.37389e-05	0.0271159	0.0135241	1.18791e-05	1.02003e-05	0.0256476	0.128701	0.11999	1.00141e-05	7.84278e-06	0.064377	0.184359
2009年	0.0444603	0.0702152	0.0016253	0.141166	0.00792086	0.0548471	0.0135241	0.00469982	0.0257326	0.0400459	0.0346596	0.11999	0.0164395	0.0516582	0.0603064	0.17064
2010年	0.168775	0.0757215	0.00297599	0.0683719	0.0103601	7.9143e-06	1.33178e-05	0.00973978	0.0321632	0.132763	0.0297101	0.0799976	0.0332166	0.0571984	1.10351e-05	0.0797562
2011年	0.122335	0.0616498	0.0041759	0.0711535	0.0140189	0.068557	1.33178e-05	0.0351927	0.0481288	1.3914e-05	0.0297101	0.0799976	0.0434307	0.0490613	0.0572535	0.040316
2012年	0.0401607	0.0697563	0.00491966	0.0704672	0.0213366	0.0666874	1.33178e-05	0.0525196	0.0636509	0.139153	0.118802	0.0799976	0.0539056	0.0657972	0.0533101	0.0694675
2013年	0.0501199	0.0691445	0.0867594	0.0727926	0.0249954	0.0791509	0.0463361	0.0576653	0.0629857	0.0356216	0.118802	0.0799976	0.0616422	0.0749731	0.0710553	0.0660379
2014年	0.0365193	0.0758744	0.088964	0.0738769	0.0288575	0.0791509	0.0637072	0.0623048	0.073186	0.0737443	0.074256	0.0799976	0.0677272	0.0784356	0.0679387	0.0780415
2015年	0.0534543	0.0761804	0.0913208	0.0542127	0.0361751	0.0791509	0.0733577	0.0676642	0.0796166	0.126987	0.118802	0.0799976	0.0732471	0.0738189	0.0666667	0.0651805
2016年	0.0546169	0.0865812	0.0943617	0.057961	0.0910575	0.0704265	0.0810782	0.083757	0.0791731	0.108714	0.113852	0.0799976	0.0816792	0.0784356	0.0462502	0.0951894
2017年	0.0793065	0.0966761	0.0968959	0.0287945	0.108742	0.0791509	0.11389	0.0886022	0.0824992	0.0238924	0.108903	0.0799976	0.0864168	0.0784356	0.0494939	0.0514622
2018年	0.0757637	0.0826044	0.0991766	0.0162074	0.119312	0.0791509	0.11003	0.0966669	0.0915908	0.0169186	0.108903	0.0799976	0.0897635	0.0784356	0.0638681	0.0780415
2019年	0.0433415	0.0757215	0.101964	1.59652e-05	0.127442	0.0791509	0.11003	0.101522	0.0982431	0.102014	0.0148615	0.0400048	0.0949792	0.0784356	0.074617	0.0137368
2020年	1.68758e-05	0.0757215	0.107463	0.0816263	0.13537	0.0791509	0.11389	0.108513	0.0884863	0.044874	1.28688e-05	1.19978e-05	0.0981956	0.0784356	0.104574	0.0060202
2021年	0.112025	0.0146932	0.108806	0.0493484	0.136996	0.0791509	0.127401	0.112338	0.0725207	0.103602	1.28688e-05	1.19978e-05	0.0991953	0.0784356	0.109917	1.8434e-05
2022年	0.00229828	9.66664e-06	0.11058	0.0543378	0.137403	0.0791509	0.133191	0.118803	0.102013	0.0260093	1.28688e-05	1.19978e-05	0.100151	0.0784356	0.110362	0.00173323
K	-0.369269
ej	x1	x2	x3	x4	x5	x6	x7	x8	x9	x10	x11	x12	x13	x14	x15	x16
	0.906109	0.959301	0.870836	0.928497	0.861784	0.965691	0.864634	0.916852	0.954337	0.901022	0.862238	0.907113	0.946692	0.970302	0.959946	0.872527
dj	0.0938911	0.0406987	0.129164	0.0715033	0.138216	0.0343089	0.135366	0.0831475	0.0456627	0.0989782	0.137762	0.0928872	0.0533084	0.0296977	0.0400542	0.127473
W	0.06944	0.0300999	0.0955273	0.0528823	0.102222	0.0253742	0.100114	0.0614942	0.0337712	0.0732023	0.101886	0.0686975	0.0394258	0.0219638	0.0296233	0.0942767
线性加权法
year	x1	x2	x3	x4	x5	x6	x7	x8	x9	x10	x11	x12	x13	x14	x15	x16	score
2008年	0.0480565	0.0216224	0	0.0528823	0	0.00869115	0.0101565	0	0	0.013486	0.101886	0.0686975	0	0	0.0172788	0.0942767	0.437034
2009年	0.0182874	0.0218605	0.00139464	0.046754	0.00588316	0.0175821	0.0101565	0.00242678	0.00851621	0.0210611	0.0274308	0.0686975	0.00646829	0.0144648	0.0161861	0.0872608	0.374431
2010年	0.06944	0.0235751	0.00256158	0.0226419	0.00769801	0	0	0.00503579	0.0106453	0.0698399	0.0235121	0.0457983	0.0130735	0.0160163	0	0.0407802	0.350618
2011年	0.0503311	0.0191934	0.00359826	0.0235633	0.0104203	0.0219776	0	0.0182119	0.0159312	0	0.0235121	0.0457983	0.0170948	0.0137375	0.0153665	0.0206093	0.299346
2012年	0.0165183	0.0217176	0.00424084	0.023336	0.0158649	0.0213782	0	0.0271814	0.0210703	0.0732023	0.0940485	0.0457983	0.0212187	0.0184244	0.014308	0.0355182	0.453826
2013年	0.0206163	0.0215271	0.0749471	0.0241062	0.0185872	0.0253742	0.0348223	0.0298452	0.02085	0.0187334	0.0940485	0.0457983	0.0242646	0.0209941	0.0190716	0.0337642	0.52735
2014年	0.0150199	0.0236227	0.0768519	0.0244654	0.0214607	0.0253742	0.0478806	0.0322469	0.0242271	0.0387901	0.0587803	0.0457983	0.0266603	0.0219638	0.018235	0.0399032	0.54128
2015年	0.0219883	0.023718	0.078888	0.0179519	0.0269052	0.0253742	0.0551353	0.0350212	0.0263562	0.0668014	0.0940485	0.0457983	0.0288335	0.0206709	0.0178935	0.0333257	0.61871
2016年	0.0224667	0.0269565	0.0815153	0.0191935	0.0677395	0.022577	0.060939	0.0433519	0.0262094	0.0571877	0.0901298	0.0457983	0.0321532	0.0219638	0.0124128	0.0486731	0.679267
2017年	0.0326259	0.0300999	0.0837046	0.00953247	0.0808972	0.0253742	0.0856047	0.0458601	0.0273106	0.0125626	0.0862111	0.0457983	0.0340184	0.0219638	0.0132835	0.0263098	0.661157
2018年	0.0311681	0.0257183	0.0856751	0.00536317	0.0887616	0.0253742	0.0827029	0.0500349	0.0303206	0.00889369	0.0862111	0.0457983	0.035336	0.0219638	0.0171422	0.0399032	0.680367
2019年	0.0178271	0.0235751	0.0880834	0	0.0948111	0.0253742	0.0827029	0.0525482	0.0325231	0.0536627	0.0117561	0.0228992	0.0373895	0.0219638	0.0200277	0.00701594	0.59216
2020年	0	0.0235751	0.0928344	0.0270322	0.100709	0.0253742	0.0856047	0.0561671	0.0292928	0.0236012	0	0	0.0386557	0.0219638	0.0280696	0.00306947	0.55595
2021年	0.0460887	0.00457214	0.0939948	0.0163407	0.101919	0.0253742	0.0957612	0.0581471	0.0240069	0.0544985	0	0	0.0390493	0.0219638	0.0295038	0	0.61122
2022年	0.000938744	0	0.0955273	0.0179933	0.102222	0.0253742	0.100114	0.0614942	0.0337712	0.0136764	0	0	0.0394258	0.0219638	0.0296233	0.000876993	0.543001

## Sheet: 省级耦合协调
year	旅游产业得分	生态安全得分	耦合度C	T	耦合协调度D
2008年	0.356981	0.437034	0.994905	0.405012	0.634782
2009年	0.392877	0.374431	0.999711	0.381809	0.617818
2010年	0.452231	0.350618	0.991958	0.391263	0.62299
2011年	0.489615	0.299346	0.970484	0.375453	0.603632
2012年	0.556933	0.453826	0.994783	0.495069	0.701774
2013年	0.585877	0.52735	0.998617	0.550761	0.741619
2014年	0.616455	0.54128	0.99789	0.57135	0.755079
2015年	0.598797	0.61871	0.999866	0.610745	0.781449
2016年	0.723017	0.679267	0.999513	0.696767	0.834523
2017年	0.727635	0.661157	0.998854	0.687748	0.82883
2018年	0.635464	0.680367	0.999418	0.662406	0.813646
2019年	0.63289	0.59216	0.999447	0.608452	0.779818
2020年	0.301644	0.55595	0.955022	0.454227	0.658633
2021年	0.259689	0.61122	0.914919	0.470608	0.656177
2022年	0.202349	0.543001	0.889449	0.40674	0.601477

## Sheet: 2010市级旅游产业数据障碍度
area	id	x1	x2	x3	x4	x5	x6	x7	x8	x9	x10	x11	x12	x13	x14	x15	x16
杭州市	1	910.9	16.9	6304.89	275.71	56.2904	91.1591	504	236	0.682722	2.8177	28.4949	22.474	23.7731	19.6655	1.15041	4.82433
宁波市	2	610.7	5.9	4624	95.2	35.7159	36.364	279	206	0.377935	2.3694	22	21.4	16.7	18.9	0.568344	1.7005
温州市	3	317.33	2.11	3487.14	39.16	18.2026	20.0428	124.608	99	0.168795	1.2052	25.1	18.6	19	18.8	0.21055	1.17613
嘉兴市	4	280.62	2.2643	3070.14	66.4063	16.245	13.3019	111.207	54	0.150642	0.505995	30.09	18.04	23.2	19.29	0.295904	3.14604
湖州市	5	205.61	1.2585	2855.68	33.165	11.7531	9.62379	80.4573	48	0.108988	0.449773	29.3	27	23	31.9	0.126864	2.7107
绍兴市	6	305.84	1.8478	3436.44	52.2841	17.4738	14.3081	119.619	94	0.162037	0.880806	26.2497	24.6997	20.5191	21.1026	0.250084	2.93922
金华市	7	258.01	3.767	2882.71	62.7437	15.5645	12.7447	106.549	84	0.144332	0.787104	27.2	23.8	22.4	18	0.196982	1.99173
衢州市	8	91.56	0.5123	1639.28	9.8826	5.22568	4.27894	35.773	45	0.0484583	0.421663	31.6	21.1	28.9	15.9	0.0308129	0.559125
舟山市	9	133.14	1.3094	2113.32	25.679	7.79516	6.38291	108	61	0.146297	0.571587	22.4276	15.1	22.1162	14.9041	0.0551236	1.3757
台州市	10	269.424	0.5629	3285.66	10.2947	15.0064	12.2877	126	60	0.17068	0.562217	18.8705	13.3965	13.8001	18.9595	0.225196	1.63944
丽水市	11	97.11	2.8908	2065.3	12.9155	6.39627	5.23745	43.7864	52	0.0593134	0.487255	36.5	24.3	34.1	22.7	0.0291191	0.341684
	MAX	910.9	16.9	6304.89	275.71	56.2904	91.1591	504	236	0.682722	2.8177	36.5	27	34.1	31.9	1.15041	4.82433
	MIN	91.56	0.5123	1639.28	9.8826	5.22568	4.27894	35.773	45	0.0484583	0.421663	18.8705	13.3965	13.8001	14.9041	0.0291191	0.341684
	最大值和最小值之差	819.34	16.3877	4665.61	265.827	51.0648	86.8801	468.227	191	0.634263	2.39604	17.6295	13.6035	20.2999	16.9959	1.12129	4.48265
标准化
area	id	x1	x2	x3	x4	x5	x6	x7	x8	x9	x10	x11	x12	x13	x14	x15	x16
杭州市	1	1	1	1	1	1	1	1	1	1	1	0.545923	0.667293	0.491281	0.28015	1	1
宁波市	2	0.633608	0.328765	0.639728	0.32095	0.59709	0.369302	0.519464	0.842932	0.519464	0.812899	0.177515	0.588343	0.142852	0.235109	0.480895	0.303129
温州市	3	0.275551	0.0974939	0.39606	0.110137	0.254127	0.181444	0.189727	0.282723	0.189727	0.327014	0.353356	0.382514	0.256153	0.229225	0.161805	0.186151
嘉兴市	4	0.230747	0.10691	0.306682	0.212633	0.215792	0.103855	0.161106	0.0471204	0.161106	0.0351967	0.636405	0.341348	0.463051	0.258056	0.237926	0.625602
湖州市	5	0.139197	0.0455342	0.260716	0.0875847	0.127826	0.0615199	0.095433	0.0157068	0.095433	0.0117322	0.591594	1	0.453199	1	0.0871718	0.528486
绍兴市	6	0.261528	0.081494	0.385193	0.159508	0.239855	0.115436	0.179071	0.256545	0.179071	0.191626	0.418573	0.830904	0.330987	0.364706	0.197062	0.579465
金华市	7	0.203151	0.198606	0.26651	0.198855	0.202465	0.0974418	0.151157	0.204188	0.151157	0.152519	0.472475	0.764767	0.423642	0.182155	0.149705	0.368096
衢州市	8	0	0	0	0	0	0	0	0	0	0	0.722057	0.56629	0.743841	0.058596	0.00151058	0.0485074
舟山市	9	0.0507482	0.0486401	0.101603	0.0594235	0.0503181	0.0242169	0.154256	0.0837696	0.154256	0.0625719	0.201769	0.125228	0.409662	0	0.0231915	0.23067
台州市	10	0.217082	0.00308768	0.352876	0.00155025	0.191536	0.0921815	0.192699	0.078534	0.192699	0.0586611	0	0	0	0.238612	0.174866	0.289506
丽水市	11	0.00677374	0.145139	0.0913107	0.0114093	0.0229237	0.0110326	0.0171144	0.0366492	0.0171144	0.0273752	1	0.801522	1	0.458693	0	0
平移
area	id	x1	x2	x3	x4	x5	x6	x7	x8	x9	x10	x11	x12	x13	x14	x15	x16
杭州市	1	1.0001	1.0001	1.0001	1.0001	1.0001	1.0001	1.0001	1.0001	1.0001	1.0001	0.546023	0.667393	0.491381	0.28025	1.0001	1.0001
宁波市	2	0.633708	0.328865	0.639828	0.32105	0.59719	0.369402	0.519564	0.843032	0.519564	0.812999	0.177615	0.588443	0.142952	0.235209	0.480995	0.303229
温州市	3	0.275651	0.0975939	0.39616	0.110237	0.254227	0.181544	0.189827	0.282823	0.189827	0.327114	0.353456	0.382614	0.256253	0.229325	0.161905	0.186251
嘉兴市	4	0.230847	0.10701	0.306782	0.212733	0.215892	0.103955	0.161206	0.0472204	0.161206	0.0352967	0.636505	0.341448	0.463151	0.258156	0.238026	0.625702
湖州市	5	0.139297	0.0456342	0.260816	0.0876847	0.127926	0.0616199	0.095533	0.0158068	0.095533	0.0118322	0.591694	1.0001	0.453299	1.0001	0.0872718	0.528586
绍兴市	6	0.261628	0.081594	0.385293	0.159608	0.239955	0.115536	0.179171	0.256645	0.179171	0.191726	0.418673	0.831004	0.331087	0.364806	0.197162	0.579565
金华市	7	0.203251	0.198706	0.26661	0.198955	0.202565	0.0975418	0.151257	0.204288	0.151257	0.152619	0.472575	0.764867	0.423742	0.182255	0.149805	0.368196
衢州市	8	0.0001	0.0001	0.0001	0.0001	0.0001	0.0001	0.0001	0.0001	0.0001	0.0001	0.722157	0.56639	0.743941	0.058696	0.00161058	0.0486074
舟山市	9	0.0508482	0.0487401	0.101703	0.0595235	0.0504181	0.0243169	0.154356	0.0838696	0.154356	0.0626719	0.201869	0.125328	0.409762	0.0001	0.0232915	0.23077
台州市	10	0.217182	0.00318768	0.352976	0.00165025	0.191636	0.0922815	0.192799	0.078634	0.192799	0.0587611	0.0001	0.0001	0.0001	0.238712	0.174966	0.289606
丽水市	11	0.00687374	0.145239	0.0914107	0.0115093	0.0230237	0.0111326	0.0172144	0.0367492	0.0172144	0.0274752	1.0001	0.801622	1.0001	0.458793	0.0001	0.0001
	sum	3.01949	2.05677	3.80178	2.16315	2.90303	2.05753	2.66113	2.84927	2.66113	2.6807	5.12077	6.06931	4.71577	3.3064	2.51523	4.16071
Pij
area	id	x1	x2	x3	x4	x5	x6	x7	x8	x9	x10	x11	x12	x13	x14	x15	x16
杭州市	1	0.331215	0.486248	0.263061	0.462335	0.344502	0.486068	0.375818	0.351002	0.375818	0.373075	0.106629	0.109962	0.1042	0.0847597	0.397617	0.240367
宁波市	2	0.209873	0.159894	0.168297	0.148418	0.205712	0.179537	0.195242	0.295877	0.195242	0.303279	0.0346852	0.0969538	0.0303136	0.0711375	0.191233	0.0728791
温州市	3	0.0912907	0.0474501	0.104204	0.0509613	0.0875729	0.0882339	0.0713331	0.0992615	0.0713331	0.122026	0.0690241	0.0630408	0.0543396	0.069358	0.0643699	0.0447642
嘉兴市	4	0.0764523	0.052028	0.0806944	0.0983441	0.0743677	0.0505244	0.0605782	0.0165728	0.0605782	0.013167	0.124299	0.0562582	0.0982133	0.0780776	0.0946338	0.150383
湖州市	5	0.0461328	0.0221873	0.0686037	0.0405356	0.0440665	0.0299485	0.0358994	0.00554767	0.0358994	0.00441386	0.115548	0.16478	0.096124	0.302474	0.0346973	0.127042
绍兴市	6	0.0866464	0.039671	0.101345	0.0737848	0.0826566	0.0561529	0.0673291	0.0900739	0.0673291	0.0715211	0.0817599	0.136919	0.0702085	0.110333	0.0783872	0.139295
金华市	7	0.0673132	0.0966108	0.0701276	0.0919746	0.0697772	0.0474072	0.0568395	0.0716986	0.0568395	0.0569326	0.092286	0.126022	0.0898564	0.0551219	0.059559	0.0884934
衢州市	8	3.31182e-05	4.86199e-05	2.63035e-05	4.62289e-05	3.44467e-05	4.8602e-05	3.7578e-05	3.50967e-05	3.7578e-05	3.73038e-05	0.141025	0.0933203	0.157756	0.0177522	0.00064033	0.0116825
舟山市	9	0.01684	0.0236974	0.0267515	0.027517	0.0173674	0.0118185	0.0580041	0.0294355	0.0580041	0.023379	0.0394216	0.0206495	0.0868919	3.02443e-05	0.00926016	0.0554641
台州市	10	0.0719269	0.00154985	0.0928449	0.000762894	0.0660122	0.0448506	0.0724502	0.027598	0.0724502	0.0219201	1.95283e-05	1.64763e-05	2.12055e-05	0.072197	0.0695626	0.0696049
丽水市	11	0.00227646	0.0706153	0.0240442	0.00532061	0.0079309	0.00541067	0.00646883	0.0128978	0.00646883	0.0102493	0.195303	0.132078	0.212076	0.138759	3.97577e-05	2.40343e-05
	K	-0.417032
	ej	x1	x2	x3	x4	x5	x6	x7	x8	x9	x10	x11	x12	x13	x14	x15	x16
		0.799248	0.695117	0.875598	0.706455	0.799402	0.690501	0.791248	0.716862	0.791248	0.683106	0.915738	0.919366	0.912748	0.868145	0.751012	0.878646
	dj	0.200752	0.304883	0.124402	0.293545	0.200598	0.309499	0.208752	0.283138	0.208752	0.316894	0.0842617	0.080634	0.087252	0.131855	0.248988	0.121354
	W	0.0626262	0.0951108	0.0388081	0.0915737	0.062578	0.0965507	0.065122	0.0883271	0.065122	0.0988575	0.0262861	0.0251544	0.027219	0.0411331	0.0776738	0.0378573
指标偏离度
area	id	x1	x2	x3	x4	x5	x6	x7	x8	x9	x10	x11	x12	x13	x14	x15	x16
杭州市	1	0	0	0	0	0	0	0	0	0	0	0.454077	0.332707	0.508719	0.71985	0	0
宁波市	2	0.366392	0.671235	0.360272	0.67905	0.40291	0.630698	0.480536	0.157068	0.480536	0.187101	0.822485	0.411657	0.857148	0.764891	0.519105	0.696871
温州市	3	0.724449	0.902506	0.60394	0.889863	0.745873	0.818556	0.810273	0.717277	0.810273	0.672986	0.646644	0.617486	0.743847	0.770775	0.838195	0.813849
嘉兴市	4	0.769253	0.89309	0.693318	0.787367	0.784208	0.896145	0.838894	0.95288	0.838894	0.964803	0.363595	0.658652	0.536949	0.741944	0.762074	0.374398
湖州市	5	0.860803	0.954466	0.739284	0.912415	0.872174	0.93848	0.904567	0.984293	0.904567	0.988268	0.408406	0	0.546801	0	0.912828	0.471514
绍兴市	6	0.738472	0.918506	0.614807	0.840492	0.760145	0.884564	0.820929	0.743455	0.820929	0.808374	0.581427	0.169096	0.669013	0.635294	0.802938	0.420535
金华市	7	0.796849	0.801394	0.73349	0.801145	0.797535	0.902558	0.848843	0.795812	0.848843	0.847481	0.527525	0.235233	0.576358	0.817845	0.850295	0.631904
衢州市	8	1	1	1	1	1	1	1	1	1	1	0.277943	0.43371	0.256159	0.941404	0.998489	0.951493
舟山市	9	0.949252	0.95136	0.898397	0.940576	0.949682	0.975783	0.845744	0.91623	0.845744	0.937428	0.798231	0.874772	0.590338	1	0.976809	0.76933
台州市	10	0.782918	0.996912	0.647124	0.99845	0.808464	0.907818	0.807301	0.921466	0.807301	0.941339	1	1	1	0.761388	0.825134	0.710494
丽水市	11	0.993226	0.854861	0.908689	0.988591	0.977076	0.988967	0.982886	0.963351	0.982886	0.972625	0	0.198478	0	0.541307	1	1
加权指标偏离度
area	id	x1	x2	x3	x4	x5	x6	x7	x8	x9	x10	x11	x12	x13	x14	x15	x16
杭州市	1	0	0	0	0	0	0	0	0	0	0	0.0119359	0.00836906	0.0138468	0.0296097	0	0	0.0637615
宁波市	2	0.0229458	0.0638417	0.0139815	0.0621831	0.0252133	0.0608943	0.0312935	0.0138734	0.0312935	0.0184963	0.0216199	0.010355	0.0233307	0.0314623	0.0403208	0.0263817	0.497487
温州市	3	0.0453695	0.0858381	0.0234378	0.081488	0.0466753	0.0790322	0.0527666	0.063355	0.0527666	0.0665298	0.0169977	0.0155325	0.0202467	0.0317043	0.0651058	0.0308101	0.777656
嘉兴市	4	0.0481754	0.0849426	0.0269064	0.0721021	0.0490742	0.0865234	0.0546304	0.0841651	0.0546304	0.0953781	0.0095575	0.016568	0.0146152	0.0305185	0.0591932	0.0141737	0.801154
湖州市	5	0.0539088	0.09078	0.0286902	0.0835532	0.0545789	0.0906109	0.0589072	0.0869398	0.0589072	0.0976977	0.0107354	0	0.0148834	0	0.0709028	0.0178502	0.818946
绍兴市	6	0.0462477	0.0873599	0.0238595	0.076967	0.0475684	0.0854052	0.0534605	0.0656673	0.0534605	0.0799138	0.0152834	0.00425352	0.0182098	0.0261316	0.0623672	0.0159203	0.762076
金华市	7	0.0499036	0.0762212	0.0284654	0.0733638	0.0499081	0.0871426	0.0552783	0.0702917	0.0552783	0.0837799	0.0138666	0.00591715	0.0156879	0.0336405	0.0660457	0.0239222	0.788713
衢州市	8	0.0626262	0.0951108	0.0388081	0.0915737	0.062578	0.0965507	0.065122	0.0883271	0.065122	0.0988575	0.00730605	0.0109097	0.00697239	0.0387229	0.0775565	0.036021	0.942165
舟山市	9	0.059448	0.0904846	0.0348651	0.086132	0.0594292	0.0942126	0.0550765	0.080928	0.0550765	0.0926718	0.0209824	0.0220044	0.0160684	0.0411331	0.0758724	0.0291248	0.91351
台州市	10	0.0490312	0.0948172	0.0251137	0.0914317	0.0505921	0.0876505	0.052573	0.0813904	0.052573	0.0930585	0.0262861	0.0251544	0.027219	0.0313182	0.0640913	0.0268974	0.879198
丽水市	11	0.062202	0.0813065	0.0352646	0.0905289	0.0611435	0.0954855	0.0640075	0.08509	0.0640075	0.0961513	0	0.00499259	0	0.0222656	0.0776738	0.0378573	0.877977
障碍度
area	id	x1	x2	x3	x4	x5	x6	x7	x8	x9	x10	x11	x12	x13	x14	x15	x16
杭州市	1	0	0	0	0	0	0	0	0	0	0	0.187196	0.131256	0.217166	0.464382	0	0
宁波市	2	0.0461234	0.128329	0.0281043	0.124994	0.0506814	0.122404	0.0629031	0.0278869	0.0629031	0.0371795	0.0434583	0.0208146	0.0468971	0.0632425	0.081049	0.0530299
温州市	3	0.0583413	0.110381	0.030139	0.104787	0.0600204	0.101629	0.0678534	0.0814692	0.0678534	0.0855516	0.0218577	0.0199735	0.0260356	0.0407691	0.0837205	0.0396192
嘉兴市	4	0.0601325	0.106025	0.0335845	0.0899978	0.0612544	0.107998	0.0681897	0.105055	0.0681897	0.119051	0.0119297	0.0206802	0.0182427	0.0380931	0.0738849	0.0176916
湖州市	5	0.0658271	0.11085	0.0350331	0.102025	0.0666453	0.110643	0.0719305	0.106161	0.0719305	0.119297	0.0131088	0	0.0181738	0	0.0865782	0.0217966
绍兴市	6	0.0606865	0.114634	0.0313086	0.100996	0.0624195	0.112069	0.0701512	0.0861689	0.0701512	0.104863	0.020055	0.0055815	0.0238951	0.03429	0.0818386	0.0208907
金华市	7	0.0632722	0.09664	0.0360909	0.0930171	0.0632779	0.110487	0.0700868	0.089122	0.0700868	0.106224	0.0175813	0.00750228	0.0198905	0.0426524	0.0837385	0.0303307
衢州市	8	0.0664705	0.100949	0.0411904	0.097195	0.0664194	0.102478	0.0691195	0.0937491	0.0691195	0.104926	0.00775453	0.0115794	0.00740039	0.0410999	0.0823173	0.0382321
舟山市	9	0.0650765	0.0990516	0.0381661	0.0942869	0.0650559	0.103132	0.0602911	0.0885901	0.0602911	0.101446	0.022969	0.0240877	0.0175897	0.0450275	0.083056	0.0318822
台州市	10	0.0557681	0.107845	0.0285643	0.103994	0.0575435	0.0996938	0.0597966	0.0925735	0.0597966	0.105845	0.0298978	0.0286107	0.0309589	0.0356214	0.0728975	0.0305931
丽水市	11	0.070847	0.0926067	0.0401657	0.103111	0.0696414	0.108756	0.0729034	0.096916	0.0729034	0.109515	0	0.00568648	0	0.0253602	0.0884691	0.0431188

## Sheet: 2010市级生态安全数据障碍度
area	id	x1	x2	x3	x4	x5	x6	x7	x8	x9	x10	x11	x12	x13	x14	x15	x16
杭州市	1	9.7	3.41	73.25	80468	88682	0.18	64.56	17503	15.12	2762.9	0.0321725	0.16966	92	100	94.13	0.233105
宁波市	2	23.0057	2.34	68.31	47983	110900	0.03	50.2	15780	10.62	1579.57	0.0388051	0.0647902	82.81	98.64	94.88	0.378281
温州市	3	2.48217	10.1	66.02	40300	63000	0.27	60.03	5715	6.28	2441	0.030821	0.00573801	65.8	89.14	95.35	0.224913
嘉兴市	4	14.666	0.67	53.33	31660	67198	0.02	12.7	9540	12.59	879.4	0.0643871	9.66297e-05	84.8	100	97.6	0.334495
湖州市	5	15.3373	0.09	52.89	10887.8	50976	0	50.9	7630	14.79	1781	0.00830432	0.011573	84.8	100	96.49	0.517072
绍兴市	6	12.1563	-0.61	58.58	41704.5	62006	0	54.03	9925	5.7939	1730	0.0063449	0.0112029	87.96	100	93.15	0.206631
金华市	7	15.1964	3.63	59.02	12309.3	28045	0	60.44	14320	8.21	3261.89	0.00654965	0.0172188	70.2	99.31	98.59	0.267819
衢州市	8	28.3571	3.55	44.13	12255.7	26322	0	71.5	4004	11.49	6319	0.0096161	0.0377669	75.65	100	97.24	0.524722
舟山市	9	12.612	-1.21	63.59	3895.71	23898	0	50	2233	15.45	777.2	0.0249913	0.0537447	74.8	100	99.75	0.355198
台州市	10	14.9665	6.22	55.54	19510.3	25309.7	0	59.3	9502	10.14	2047	0.0329595	0.0925935	75.6	96.99	97.6	0.207443
丽水市	11	29.5987	7.58	48.4	14025.1	15200	6.88	80.79	3374	11.55	11670	0.0641665	0.525033	66.9	99.57	94.99	0.467362
	MAX	29.5987	10.1	73.25	80468	110900	6.88	80.79	17503	15.45	11670	0.0643871	0.525033	92	100	99.75	0.524722
	MIN	2.48217	-1.21	44.13	3895.71	15200	0	12.7	2233	5.7939	777.2	0.0063449	9.66297e-05	65.8	89.14	93.15	0.206631
	最大值和最小值之差	27.1165	11.31	29.12	76572.3	95700	6.88	68.09	15270	9.6561	10892.8	0.0580422	0.524936	26.2	10.86	6.6	0.318091
标准化
area	id	x1	x2	x3	x4	x5	x6	x7	x8	x9	x10	x11	x12	x13	x14	x15	x16
杭州市	1	0.266178	0.408488	1	0	0.232163	0.973837	0.761639	1	0.965825	0.182295	0.44498	0.323017	1	1	0.148485	0.083228
宁波市	2	0.756864	0.313882	0.830357	0.42424	0	0.99564	0.550742	0.887164	0.499798	0.0736607	0.559252	0.123241	0.649237	0.87477	0.262121	0.539626
温州市	3	0	1	0.751717	0.524576	0.500522	0.960756	0.695109	0.228029	0.0503414	0.152743	0.421696	0.0107468	0	0	0.333333	0.0574759
嘉兴市	4	0.449313	0.166225	0.315934	0.637411	0.456656	0.997093	0	0.47852	0.703814	0.00938234	1	0	0.725191	1	0.674242	0.401973
湖州市	5	0.47407	0.114943	0.300824	0.908687	0.626165	1	0.561022	0.353438	0.931649	0.0921526	0.0337586	0.0218624	0.725191	1	0.506061	0.975951
绍兴市	6	0.356763	0.0530504	0.496223	0.506234	0.510909	1	0.606991	0.503733	0	0.0874706	0	0.0211574	0.845802	1	0	0
金华市	7	0.468875	0.42794	0.511332	0.890123	0.865778	1	0.701131	0.791552	0.250215	0.228104	0.00352762	0.0326176	0.167939	0.936464	0.824242	0.19236
衢州市	8	0.954214	0.420866	0	0.890823	0.883783	1	0.863563	0.115979	0.589897	0.508758	0.0563591	0.0717615	0.375954	1	0.619697	1
舟山市	9	0.373568	0	0.668269	1	0.909112	1	0.547804	0	1	0	0.321256	0.102199	0.343511	1	1	0.467058
台州市	10	0.460395	0.656941	0.391827	0.79608	0.894361	1	0.684388	0.476031	0.450089	0.116572	0.458539	0.176206	0.374046	0.722836	0.674242	0.00255347
丽水市	11	1	0.777188	0.146635	0.867714	1	0	1	0.0747217	0.59611	1	0.9962	1	0.0419847	0.960405	0.278788	0.819676
平移
area	id	x1	x2	x3	x4	x5	x6	x7	x8	x9	x10	x11	x12	x13	x14	x15	x16
杭州市	1	0.266278	0.408588	1.0001	0.0001	0.232263	0.973937	0.761739	1.0001	0.965925	0.182395	0.44508	0.323117	1.0001	1.0001	0.148585	0.083328
宁波市	2	0.756964	0.313982	0.830457	0.42434	0.0001	0.99574	0.550842	0.887264	0.499898	0.0737607	0.559352	0.123341	0.649337	0.87487	0.262221	0.539726
温州市	3	0.0001	1.0001	0.751817	0.524676	0.500622	0.960856	0.695209	0.228129	0.0504414	0.152843	0.421796	0.0108468	0.0001	0.0001	0.333433	0.0575759
嘉兴市	4	0.449413	0.166325	0.316034	0.637511	0.456756	0.997193	0.0001	0.47862	0.703914	0.00948234	1.0001	0.0001	0.725291	1.0001	0.674342	0.402073
湖州市	5	0.47417	0.115043	0.300924	0.908787	0.626265	1.0001	0.561122	0.353538	0.931749	0.0922526	0.0338586	0.0219624	0.725291	1.0001	0.506161	0.976051
绍兴市	6	0.356863	0.0531504	0.496323	0.506334	0.511009	1.0001	0.607091	0.503833	0.0001	0.0875706	0.0001	0.0212574	0.845902	1.0001	0.0001	0.0001
金华市	7	0.468975	0.42804	0.511432	0.890223	0.865878	1.0001	0.701231	0.791652	0.250315	0.228204	0.00362762	0.0327176	0.168039	0.936564	0.824342	0.19246
衢州市	8	0.954314	0.420966	0.0001	0.890923	0.883883	1.0001	0.863663	0.116079	0.589997	0.508858	0.0564591	0.0718615	0.376054	1.0001	0.619797	1.0001
舟山市	9	0.373668	0.0001	0.668369	1.0001	0.909212	1.0001	0.547904	0.0001	1.0001	0.0001	0.321356	0.102299	0.343611	1.0001	1.0001	0.467158
台州市	10	0.460495	0.657041	0.391927	0.79618	0.894461	1.0001	0.684488	0.476131	0.450189	0.116672	0.458639	0.176306	0.374146	0.722936	0.674342	0.00265347
丽水市	11	1.0001	0.777288	0.146735	0.867814	1.0001	0.0001	1.0001	0.0748217	0.59621	1.0001	0.9963	1.0001	0.0420847	0.960505	0.278888	0.819776
	sum	5.56134	4.34062	5.41422	7.44699	6.88055	9.92843	6.97349	4.91027	6.03884	2.45224	4.29667	1.88391	5.24995	9.49558	5.32231	4.541
Pij
area	id	x1	x2	x3	x4	x5	x6	x7	x8	x9	x10	x11	x12	x13	x14	x15	x16
杭州市	1	0.0478803	0.0941312	0.184717	1.34282e-05	0.0337565	0.0980958	0.109234	0.203675	0.159952	0.0743789	0.103587	0.171514	0.190497	0.105323	0.0279173	0.0183501
宁波市	2	0.136112	0.0723356	0.153385	0.0569814	1.45337e-05	0.100292	0.0789908	0.180696	0.0827805	0.0300789	0.130183	0.0654707	0.123684	0.0921345	0.0492683	0.118856
温州市	3	1.79813e-05	0.230405	0.13886	0.0704548	0.0727591	0.0967783	0.0996932	0.0464595	0.00835283	0.062328	0.0981682	0.0057576	1.90478e-05	1.05312e-05	0.0626482	0.0126791
嘉兴市	4	0.0808102	0.0383181	0.0583711	0.0856065	0.0663837	0.100438	1.434e-05	0.0974733	0.116565	0.00386681	0.232762	5.30811e-05	0.138152	0.105323	0.126701	0.0885428
湖州市	5	0.0852619	0.0265037	0.0555804	0.122034	0.0910196	0.100731	0.080465	0.0719998	0.154293	0.0376198	0.0078802	0.0116579	0.138152	0.105323	0.0951016	0.214942
绍兴市	6	0.0641686	0.0122449	0.0916702	0.0679918	0.0742686	0.100731	0.087057	0.102608	1.65595e-05	0.0357105	2.32738e-05	0.0112837	0.161125	0.105323	1.87888e-05	2.20216e-05
金华市	7	0.0843278	0.0986126	0.094461	0.119541	0.125844	0.100731	0.100557	0.161224	0.0414509	0.0930595	0.000844287	0.0173669	0.0320077	0.0986316	0.154884	0.0423827
衢州市	8	0.171598	0.096983	1.84699e-05	0.119635	0.128461	0.100731	0.123849	0.0236401	0.0977003	0.207508	0.0131402	0.0381449	0.07163	0.105323	0.116453	0.220238
舟山市	9	0.0671902	2.30382e-05	0.123447	0.134296	0.132142	0.100731	0.0785696	2.03655e-05	0.165611	4.07791e-05	0.0747918	0.0543016	0.0654504	0.105323	0.187907	0.102876
台州市	10	0.0828028	0.15137	0.0723885	0.106913	0.129998	0.100731	0.0981558	0.0969665	0.0745489	0.0475779	0.106743	0.0935852	0.0712665	0.076134	0.126701	0.000584335
丽水市	11	0.179831	0.179073	0.0271017	0.116532	0.145352	1.00721e-05	0.143415	0.0152378	0.0987293	0.407831	0.231877	0.530864	0.00801621	0.101153	0.0523998	0.180528
	K	-0.417032
		x1	x2	x3	x4	x5	x6	x7	x8	x9	x10	x11	x12	x13	x14	x15	x16
	ej	0.923245	0.865141	0.912627	0.945537	0.931639	0.960259	0.952324	0.87528	0.899784	0.748124	0.809218	0.635821	0.884113	0.958514	0.907956	0.809787
	dj	0.0767552	0.134859	0.0873729	0.054463	0.0683615	0.0397413	0.0476763	0.12472	0.100216	0.251876	0.190782	0.364179	0.115887	0.0414857	0.0920445	0.190213
	W	0.0387529	0.0680891	0.0441136	0.0274978	0.034515	0.020065	0.0240712	0.0629695	0.0505979	0.12717	0.0963237	0.18387	0.05851	0.0209457	0.0464723	0.0960367
指标偏离度
area	id	x1	x2	x3	x4	x5	x6	x7	x8	x9	x10	x11	x12	x13	x14	x15	x16
杭州市	1	0.733822	0.591512	0	1	0.767837	0.0261628	0.238361	0	0.0341753	0.817705	0.55502	0.676983	0	0	0.851515	0.916772
宁波市	2	0.243136	0.686118	0.169643	0.57576	1	0.00436047	0.449258	0.112836	0.500202	0.926339	0.440748	0.876759	0.350763	0.12523	0.737879	0.460374
温州市	3	1	0	0.248283	0.475424	0.499478	0.0392442	0.304891	0.771971	0.949659	0.847257	0.578304	0.989253	1	1	0.666667	0.942524
嘉兴市	4	0.550687	0.833775	0.684066	0.362589	0.543344	0.00290698	1	0.52148	0.296186	0.990618	0	1	0.274809	0	0.325758	0.598027
湖州市	5	0.52593	0.885057	0.699176	0.0913129	0.373835	0	0.438978	0.646562	0.0683506	0.907847	0.966241	0.978138	0.274809	0	0.493939	0.0240493
绍兴市	6	0.643237	0.94695	0.503777	0.493766	0.489091	0	0.393009	0.496267	1	0.912529	1	0.978843	0.154198	0	1	1
金华市	7	0.531125	0.57206	0.488668	0.109877	0.134222	0	0.298869	0.208448	0.749785	0.771896	0.996472	0.967382	0.832061	0.0635359	0.175758	0.80764
衢州市	8	0.0457858	0.579134	1	0.109177	0.116217	0	0.136437	0.884021	0.410103	0.491242	0.943641	0.928239	0.624046	0	0.380303	0
舟山市	9	0.626432	1	0.331731	0	0.0908882	0	0.452196	1	0	1	0.678744	0.897801	0.656489	0	0	0.532942
台州市	10	0.539605	0.343059	0.608173	0.20392	0.105639	0	0.315612	0.523969	0.549911	0.883428	0.541461	0.823794	0.625954	0.277164	0.325758	0.997447
丽水市	11	0	0.222812	0.853365	0.132286	0	1	0	0.925278	0.40389	0	0.00380019	0	0.958015	0.0395948	0.721212	0.180324
加权指标偏离度
area	id	x1	x2	x3	x4	x5	x6	x7	x8	x9	x10	x11	x12	x13	x14	x15	x16
杭州市	1	0.0284377	0.0402755	0	0.0274978	0.0265019	0.000524955	0.00573764	0	0.0017292	0.103987	0.0534616	0.124477	0	0	0.0395718	0.0880437	0.540246
宁波市	2	0.00942223	0.0467172	0.00748356	0.0158321	0.034515	8.74925e-05	0.0108142	0.00710521	0.0253091	0.117802	0.0424545	0.16121	0.0205232	0.00262303	0.0342909	0.0442128	0.580403
温州市	3	0.0387529	0	0.0109527	0.0130731	0.0172395	0.000787433	0.00733909	0.0486107	0.0480507	0.107745	0.0557044	0.181894	0.05851	0.0209457	0.0309815	0.0905169	0.731104
嘉兴市	4	0.0213407	0.056771	0.0301766	0.0099704	0.0187535	5.83284e-05	0.0240712	0.0328373	0.0149864	0.125977	0	0.18387	0.0160791	0	0.0151387	0.0574325	0.607462
湖州市	5	0.0203813	0.0602627	0.0308432	0.0025109	0.0129029	0	0.0105667	0.0407137	0.00345839	0.115451	0.0930719	0.17985	0.0160791	0	0.0229545	0.00230962	0.611356
绍兴市	6	0.0249273	0.0644769	0.0222235	0.0135775	0.016881	0	0.00946022	0.0312497	0.0505979	0.116046	0.0963237	0.17998	0.00902215	0	0.0464723	0.0960367	0.777275
金华市	7	0.0205826	0.038951	0.0215569	0.00302139	0.00463265	0	0.00719415	0.0131259	0.0379375	0.0981618	0.0959839	0.177873	0.0486839	0.0013308	0.00816785	0.0775631	0.654766
衢州市	8	0.00177433	0.0394327	0.0441136	0.00300213	0.00401124	0	0.00328421	0.0556664	0.0207504	0.0624711	0.090895	0.170675	0.0365129	0	0.0176735	0	0.550263
舟山市	9	0.0242761	0.0680891	0.0146339	0	0.003137	0	0.0108849	0.0629695	0	0.12717	0.0653792	0.165079	0.0384111	0	0	0.051182	0.631211
台州市	10	0.0209113	0.0233586	0.0268287	0.00560734	0.00364614	0	0.00759716	0.0329941	0.0278243	0.112345	0.0521555	0.151471	0.0366246	0.00580539	0.0151387	0.0957914	0.6181
丽水市	11	0	0.015171	0.0376451	0.00363756	0	0.020065	0	0.0582643	0.020436	0	0.000366048	0	0.0560535	0.000829341	0.0335164	0.0173177	0.263302
障碍度
area	id	x1	x2	x3	x4	x5	x6	x7	x8	x9	x10	x11	x12	x13	x14	x15	x16
杭州市	1	0.0526384	0.0745503	0	0.0508986	0.0490552	0.000971696	0.0106204	0	0.00320076	0.192481	0.0989579	0.230408	0	0	0.0732478	0.16297
宁波市	2	0.016234	0.080491	0.0128937	0.0272779	0.0594673	0.000150745	0.0186322	0.0122419	0.0436062	0.202967	0.0731466	0.277755	0.0353602	0.00451933	0.0590812	0.0761761
温州市	3	0.053006	0	0.014981	0.0178813	0.02358	0.00107705	0.0100384	0.0664894	0.0657235	0.147374	0.0761922	0.248794	0.0800297	0.0286494	0.0423763	0.123808
嘉兴市	4	0.0351309	0.093456	0.0496765	0.0164132	0.0308719	9.60197e-05	0.0396259	0.0540566	0.0246704	0.207382	0	0.302686	0.0264693	0	0.0249212	0.094545
湖州市	5	0.0333379	0.0985723	0.0504505	0.00410711	0.0211054	0	0.0172841	0.0665957	0.00565692	0.188844	0.152239	0.294183	0.0263007	0	0.0375468	0.00377786
绍兴市	6	0.0320701	0.0829526	0.0285915	0.017468	0.0217181	0	0.012171	0.0402042	0.0650965	0.149299	0.123925	0.231553	0.0116074	0	0.0597887	0.123556
金华市	7	0.0314351	0.0594885	0.0329231	0.00461445	0.00707528	0	0.0109874	0.0200467	0.0579406	0.149919	0.146593	0.271658	0.0743531	0.00203249	0.0124745	0.118459
衢州市	8	0.00322452	0.0716615	0.0801683	0.00545582	0.00728968	0	0.00596844	0.101163	0.0377099	0.11353	0.165185	0.310171	0.0663554	0	0.0321184	0
舟山市	9	0.0384595	0.107871	0.0231838	0	0.00496982	0	0.0172445	0.0997598	0	0.201469	0.103577	0.261527	0.0608531	0	0	0.0810853
台州市	10	0.0338315	0.037791	0.0434052	0.0090719	0.00589896	0	0.0122912	0.0533798	0.045016	0.181759	0.0843805	0.245059	0.0592535	0.00939232	0.0244923	0.154977
丽水市	11	0	0.0576184	0.142973	0.0138152	0	0.0762051	0	0.221283	0.0776142	0	0.00139022	0	0.212887	0.00314977	0.127293	0.0657714
