# Supplementary material for: Spatiotemporal Evolution Characteristics and Obstacle Factors of the Coordinated Development between the Tourism Industry and Ecological Security
Source: Research Square preprint supplement (doi:10.21203/rs.3.rs-6613050/v1), 2025-06-18
Supplement: Supplementary file 3 [file 省级耦合度+市级障碍度.xlsx]

## Sheet: 省级熵值法旅游产业数据
浙江省 指标层	2008年	2009年	2010年	2011年	2012年	2013年	2014年	2015年	2016年	2017年	2018年	2019年	2020年	2021年	2022年	单位
国内旅游收入A1	2040	2424	3046	3785	4476	5202	5947	6720	7600	8764	9834	10727	8264	6772	5982	亿元
旅游外汇收入A2	30.2408	32.2358	39.302	45.4173	51.5174	53.9293	57.5348	67.8847	74.3063	82.76	25.9579	26.6823	1.6367	2.0424	1.217	亿美元
国内游客接待量A3	20900	24400	29500	34300	39100	43400	47700	53500	58400	64100	69000	73000	57000	41000	37465	万人
入境游客接待量A4	539.67	570.6	684.71	773.69	865.93	866.28	931.03	1012	1120.3	1211.73	456.8	467.1	38.35	42.84	22.06
旅行社营业收入A5	129.647	145.61	205.669	236.912	259.976	240.856	256.671	258.53	543.979	473.392	402.805	332.217	132.386	167.373	161.545	亿元
星级酒店营业收入A6	186.681	189.487	225.731	223.274	204.098	207.633	220.252	200.411	194.806	186.569	187.463	160.594	120.613	123.236	112.62
旅行社数量A7	1413	1509	1639	1860	2012	2102	2160	2461	2105	2161	2769	2769	2896	3014	3181	家
星级酒店数量A8	1080	1096	1046	991	958	935	831	765	686	604	575	528	533	473	437
旅行社职工人数A9	2.3168	2.2989	2.2202	2.4094	2.648	2.7543	2.7607	2.4066	2.7889	2.7244	2.91505	3.1057	2.6586	2.4121	2.1656	万人
星级酒店从业人员A10	14.7425	14.4755	11.0587	8.9162	11.3701	11.887	10.7453	9.8288	9.5109	8.7567	8.041	7.3452	5.8832	5.1959	4.6542
国内旅游收入增长率A11	12.0879	18.824	25.66	24.2613	18.256	16.2198	14.321	12.998	13.095	15.315	12.209	9.08	-22.96	-25.326	-11.666	%
旅游外汇收入增长率A12	11.6634	6.597	21.92	15.5598	13.431	4.682	6.686	17.989	9.4596	11.376	-68.634	2.79	-93.865	24.787	-40.413
国内游客数量增长率A13	9.42408	16.794	20.852	16.2542	14.081	11.029	10.212	9.727	9.076	9.717	8.777	5.547	-21.06	-28.07	-7.317
入境游客数量增长率A14	5.57325	5.7388	19.99	12.9954	11.922	0.041	7.474	8.701	10.698	8.161	37.694	2.267	-91.79	11.72	-48.506
旅游R&D全时当量A15	1.67113	2.14314	2.71904	3.23475	3.85847	4.5835	5.31017	6.07113	6.55575	7.1693	8.15547	9.35715	7.46625	5.29928	4.94381	万人
旅游R&D经费占比A16	1.63021	1.69401	1.87941	2.03877	2.35337	2.57463	2.85767	2.50285	2.8198	3.00849	2.92196	2.8219	2.29815	1.78261	1.50325	%
浙江省 指标层	国内旅游收入A1	旅游外汇收入A2	国内游客接待量A3	入境游客接待量A4	旅行社营业收入A5	星级酒店营业收入A6	旅行社数量A7	星级酒店数量A8	旅行社职工人数A9	星级酒店从业人员A10	国内旅游收入增长率A11	旅游外汇收入增长率A12	国内游客数量增长率A13	入境游客数量增长率A14	旅游R&D全时当量A15	旅游R&D经费占比A16
2008年	2040	30.2408	20900	539.67	129.647	186.681	1413	1080	2.3168	14.7425	12.0879	11.6634	9.42408	5.57325	1.67113	1.63021
2009年	2424	32.2358	24400	570.6	145.61	189.487	1509	1096	2.2989	14.4755	18.824	6.597	16.794	5.7388	2.14314	1.69401
2010年	3046	39.302	29500	684.71	205.669	225.731	1639	1046	2.2202	11.0587	25.66	21.92	20.852	19.99	2.71904	1.87941
2011年	3785	45.4173	34300	773.69	236.912	223.274	1860	991	2.4094	8.9162	24.2613	15.5598	16.2542	12.9954	3.23475	2.03877
2012年	4476	51.5174	39100	865.93	259.976	204.098	2012	958	2.648	11.3701	18.256	13.431	14.081	11.922	3.85847	2.35337
2013年	5202	53.9293	43400	866.28	240.856	207.633	2102	935	2.7543	11.887	16.2198	4.682	11.029	0.041	4.5835	2.57463
2014年	5947	57.5348	47700	931.03	256.671	220.252	2160	831	2.7607	10.7453	14.321	6.686	10.212	7.474	5.31017	2.85767
2015年	6720	67.8847	53500	1012	258.53	200.411	2461	765	2.4066	9.8288	12.998	17.989	9.727	8.701	6.07113	2.50285
2016年	7600	74.3063	58400	1120.3	543.979	194.806	2105	686	2.7889	9.5109	13.095	9.4596	9.076	10.698	6.55575	2.8198
2017年	8764	82.76	64100	1211.73	473.392	186.569	2161	604	2.7244	8.7567	15.315	11.376	9.717	8.161	7.1693	3.00849
2018年	9834	25.9579	69000	456.8	402.805	187.463	2769	575	2.91505	8.041	12.209	-68.634	8.777	37.694	8.15547	2.92196
2019年	10727	26.6823	73000	467.1	332.217	160.594	2769	528	3.1057	7.3452	9.08	2.79	5.547	2.267	9.35715	2.8219
2020年	8264	1.6367	57000	38.35	132.386	120.613	2896	533	2.6586	5.8832	-22.96	-93.865	-21.06	-91.79	7.46625	2.29815
2021年	6772	2.0424	41000	42.84	167.373	123.236	3014	473	2.4121	5.1959	-25.326	24.787	-28.07	11.72	5.29928	1.78261
2022年	5982	1.217	37465	22.06	161.545	112.62	3181	437	2.1656	4.6542	-11.666	-40.413	-7.317	-48.506	4.94381	1.50325
单位	亿元	亿美元	万人	0	亿元	0	家	0	万人	0	%	0	0	0	万人	%
max	10727	82.76	73000	1211.73	543.979	225.731	3181	1096	3.1057	14.7425	25.66	24.787	20.852	37.694	9.35715	3.00849
min	2040	1.217	20900	22.06	129.647	112.62	1413	437	2.1656	4.6542	-25.326	-93.865	-28.07	-91.79	1.67113	1.50325
极差	8687	81.543	52100	1189.67	414.332	113.111	1768	659	0.9401	10.0883	50.986	118.652	48.922	129.484	7.68601	1.50524
标准化
浙江省 指标层	国内旅游收入A1	旅游外汇收入A2	国内游客接待量A3	入境游客接待量A4	旅行社营业收入A5	星级酒店营业收入A6	旅行社数量A7	星级酒店数量A8	旅行社职工人数A9	星级酒店从业人员A10	国内旅游收入增长率A11	旅游外汇收入增长率A12	国内游客数量增长率A13	入境游客数量增长率A14	旅游R&D全时当量A15	旅游R&D经费占比A16
2008年	0	0.355932	0	0.435087	0	0.654758	0	0.975721	0.160834	1	0.733807	0.889394	0.766405	0.751933	0	0.0843459
2009年	0.044204	0.380398	0.0671785	0.461086	0.0385269	0.67957	0.0542986	1	0.141793	0.973534	0.865924	0.846695	0.917052	0.753211	0.0614114	0.126729
2010年	0.115805	0.467054	0.165067	0.557003	0.183481	1	0.127828	0.924127	0.0580789	0.634844	1	0.975837	1	0.863273	0.136339	0.249901
2011年	0.200875	0.542049	0.257198	0.631797	0.258887	0.978274	0.252828	0.840668	0.259334	0.42247	0.972567	0.922233	0.906018	0.809254	0.203436	0.355773
2012年	0.280419	0.616857	0.349328	0.709331	0.314553	0.808746	0.338801	0.790592	0.513137	0.665712	0.854784	0.904292	0.861596	0.800964	0.284586	0.564774
2013年	0.363992	0.646436	0.431862	0.709625	0.268405	0.839993	0.389706	0.75569	0.62621	0.716949	0.814847	0.830555	0.799211	0.709207	0.378917	0.711765
2014年	0.449753	0.690652	0.514395	0.764052	0.306576	0.951562	0.422511	0.597876	0.633018	0.603779	0.777606	0.847445	0.782511	0.766612	0.473462	0.899802
2015年	0.538736	0.817577	0.62572	0.832113	0.311063	0.776151	0.59276	0.497724	0.256356	0.512931	0.751657	0.942706	0.772597	0.776088	0.572468	0.664078
2016年	0.640037	0.896328	0.71977	0.923147	1	0.726598	0.391403	0.377845	0.663015	0.481419	0.75356	0.870821	0.75929	0.791511	0.63552	0.874645
2017年	0.77403	1	0.829175	1	0.829636	0.653768	0.423077	0.253414	0.594405	0.406659	0.797101	0.886972	0.772393	0.771918	0.715347	1
2018年	0.897203	0.303409	0.923225	0.365429	0.659273	0.661679	0.766968	0.209408	0.797202	0.335716	0.736182	0.212647	0.753179	1	0.843653	0.942513
2019年	1	0.312293	1	0.374087	0.488909	0.424127	0.766968	0.138088	1	0.266745	0.674813	0.814609	0.687155	0.726399	1	0.876037
2020年	0.716473	0.00514698	0.692898	0.0136929	0.0066112	0.0706676	0.838801	0.145675	0.524412	0.121824	0.0464049	0	0.143289	0	0.753982	0.52809
2021年	0.544722	0.0101223	0.385797	0.017467	0.0910517	0.0938527	0.905543	0.0546282	0.262206	0.0536959	0	1	0	0.799404	0.472045	0.185591
2022年	0.453782	0	0.317946	0	0.0769859	0	1	0	0	0	0.267917	0.450494	0.424206	0.334281	0.425796	0
平移(ln函数）
浙江省 指标层	国内旅游收入A1	旅游外汇收入A2	国内游客接待量A3	入境游客接待量A4	旅行社营业收入A5	星级酒店营业收入A6	旅行社数量A7	星级酒店数量A8	旅行社职工人数A9	星级酒店从业人员A10	国内旅游收入增长率A11	旅游外汇收入增长率A12	国内游客数量增长率A13	入境游客数量增长率A14	旅游R&D全时当量A15	旅游R&D经费占比A16
2008年	0.0001	0.356032	0.0001	0.435187	0.0001	0.654858	0.0001	0.975821	0.160934	1.0001	0.733907	0.889494	0.766505	0.752033	0.0001	0.0844459	0.0001
2009年	0.044304	0.380498	0.0672785	0.461186	0.0386269	0.67967	0.0543986	1.0001	0.141893	0.973634	0.866024	0.846795	0.917152	0.753311	0.0615114	0.126829	0.0001
2010年	0.115905	0.467154	0.165167	0.557103	0.183581	1.0001	0.127928	0.924227	0.0581789	0.634944	1.0001	0.975937	1.0001	0.863373	0.136439	0.250001	0.0001
2011年	0.200975	0.542149	0.257298	0.631897	0.258987	0.978374	0.252928	0.840768	0.259434	0.42257	0.972667	0.922333	0.906118	0.809354	0.203536	0.355873	0.0001
2012年	0.280519	0.616957	0.349428	0.709431	0.314653	0.808846	0.338901	0.790692	0.513237	0.665812	0.854884	0.904392	0.861696	0.801064	0.284686	0.564874	0.0001
2013年	0.364092	0.646536	0.431962	0.709725	0.268505	0.840093	0.389806	0.75579	0.62631	0.717049	0.814947	0.830655	0.799311	0.709307	0.379017	0.711865	0.0001
2014年	0.449853	0.690752	0.514495	0.764152	0.306676	0.951662	0.422611	0.597976	0.633118	0.603879	0.777706	0.847545	0.782611	0.766712	0.473562	0.899902	0.0001
2015年	0.538836	0.817677	0.62582	0.832213	0.311163	0.776251	0.59286	0.497824	0.256456	0.513031	0.751757	0.942806	0.772697	0.776188	0.572568	0.664178	0.0001
2016年	0.640137	0.896428	0.71987	0.923247	1.0001	0.726698	0.391503	0.377945	0.663115	0.481519	0.75366	0.870921	0.75939	0.791611	0.63562	0.874745	0.0001
2017年	0.77413	1.0001	0.829275	1.0001	0.829736	0.653868	0.423177	0.253514	0.594505	0.406759	0.797201	0.887072	0.772493	0.772018	0.715447	1.0001	0.0001
2018年	0.897303	0.303509	0.923325	0.365529	0.659373	0.661779	0.767068	0.209508	0.797302	0.335816	0.736282	0.212747	0.753279	1.0001	0.843753	0.942613	0.0001
2019年	1.0001	0.312393	1.0001	0.374187	0.489009	0.424227	0.767068	0.138188	1.0001	0.266845	0.674913	0.814709	0.687255	0.726499	1.0001	0.876137	0.0001
2020年	0.716573	0.00524698	0.692998	0.0137929	0.0067112	0.0707676	0.838901	0.145775	0.524512	0.121924	0.0465049	0.0001	0.143389	0.0001	0.754082	0.52819	0.0001
2021年	0.544822	0.0102223	0.385897	0.017567	0.0911517	0.0939527	0.905643	0.0547282	0.262306	0.0537959	0.0001	1.0001	0.0001	0.799504	0.472145	0.185691	0.0001
2022年	0.453882	0.0001	0.318046	0.0001	0.0770859	0.0001	1.0001	0.0001	0.0001	0.0001	0.268017	0.450594	0.424306	0.334381	0.425896	0.0001	0.0001
sum	7.02153	7.04576	7.28106	7.79542	4.83546	9.32125	7.27299	7.56296	6.4915	7.19778	10.0487	11.3962	10.3464	10.6556	6.95846	8.06554
Pij
浙江省 指标层	国内旅游收入A1	旅游外汇收入A2	国内游客接待量A3	入境游客接待量A4	旅行社营业收入A5	星级酒店营业收入A6	旅行社数量A7	星级酒店数量A8	旅行社职工人数A9	星级酒店从业人员A10	国内旅游收入增长率A11	旅游外汇收入增长率A12	国内游客数量增长率A13	入境游客数量增长率A14	旅游R&D全时当量A15	旅游R&D经费占比A16
2008年	1.42419e-05	0.0505315	1.37343e-05	0.055826	2.06806e-05	0.0702543	1.37495e-05	0.129026	0.0247915	0.138946	0.0730353	0.0780518	0.0740842	0.0705766	1.4371e-05	0.01047
2009年	0.00630973	0.0540039	0.00924021	0.0591611	0.00798826	0.0729162	0.00747954	0.132237	0.0218583	0.135269	0.0861829	0.074305	0.0886445	0.0706966	0.0088398	0.0157248
2010年	0.0165071	0.0663029	0.0226845	0.0714655	0.0379655	0.107293	0.0175895	0.122205	0.00896232	0.0882139	0.0995256	0.0856371	0.0966616	0.0810256	0.0196077	0.0309962
2011年	0.0286227	0.0769469	0.035338	0.0810601	0.0535601	0.104962	0.0347763	0.111169	0.0399652	0.0587083	0.0967956	0.0809334	0.0875781	0.075956	0.0292502	0.0441226
2012年	0.0399513	0.0875644	0.0479914	0.0910062	0.065072	0.0867744	0.0465972	0.104548	0.0790629	0.0925024	0.0850743	0.0793591	0.0832846	0.0751781	0.0409122	0.0700354
2013年	0.0518537	0.0917624	0.0593268	0.0910439	0.0555283	0.0901267	0.0535963	0.0999332	0.0964815	0.0996209	0.0811	0.0728888	0.077255	0.0665669	0.0544685	0.08826
2014年	0.0640676	0.098038	0.0706622	0.0980258	0.0634223	0.102096	0.0581069	0.0790664	0.0975303	0.0838979	0.0773939	0.0743708	0.0756409	0.0719542	0.0680556	0.111574
2015年	0.0767405	0.116052	0.0859518	0.106757	0.0643503	0.0832775	0.0815153	0.065824	0.0395064	0.0712763	0.0748116	0.0827299	0.0746827	0.0728435	0.0822837	0.0823475
2016年	0.0911677	0.12723	0.0988688	0.118435	0.206826	0.0779615	0.0538297	0.0499732	0.102151	0.0668983	0.075001	0.076422	0.0733966	0.0742909	0.0913448	0.108455
2017年	0.110251	0.141944	0.113895	0.128293	0.171594	0.0701482	0.0581847	0.0335205	0.091582	0.0565118	0.079334	0.0778393	0.0746629	0.0724522	0.102817	0.123997
2018年	0.127793	0.0430769	0.126812	0.0468902	0.136362	0.0709969	0.105468	0.0277019	0.122823	0.0466555	0.0732716	0.0186682	0.0728058	0.0938572	0.121256	0.116869
2019年	0.142433	0.0443377	0.137356	0.0480009	0.10113	0.0455119	0.105468	0.0182717	0.154063	0.0370732	0.0671644	0.0714895	0.0664245	0.0681803	0.143724	0.108627
2020年	0.102054	0.000744701	0.0951782	0.00176936	0.00138791	0.00759207	0.115345	0.0192749	0.0807998	0.0169392	0.00462797	8.77486e-06	0.0138589	9.38478e-06	0.108369	0.0654872
2021年	0.0775931	0.00145084	0.0530001	0.00225351	0.0188507	0.0100794	0.124521	0.00723635	0.0404076	0.00747396	9.95157e-06	0.0877573	9.6652e-06	0.0750317	0.067852	0.0230228
2022年	0.0646414	1.41929e-05	0.0436813	1.2828e-05	0.0159418	1.07282e-05	0.137509	1.32223e-05	1.54048e-05	1.38932e-05	0.0266719	0.039539	0.04101	0.0313809	0.0612055	1.23984e-05
k	-0.369269	k=-1/LN(样本量)				-0.369269	-0.369269	-0.369269	-0.369269	-0.369269	-0.369269	-0.369269	-0.369269	-0.369269	-0.369269	-0.369269
	-2.467	-2.42384	-2.486	-2.45385	-2.29131	-2.51981	-2.47266	-2.42677	-2.45785	-2.48589	-2.55328	-2.5971	-2.58731	-2.62043	-2.48152	-2.46642
ej	0.910989	0.89505	0.918004	0.906131	0.846111	0.930489	0.913079	0.896132	0.90761	0.917963	0.94285	0.95903	0.955414	0.967646	0.916348	0.910773
Dj	0.0890108	0.10495	0.0819963	0.0938694	0.153889	0.0695111	0.086921	0.103868	0.0923903	0.0820374	0.0571502	0.0409697	0.0445859	0.0323537	0.0836517	0.0892274
W	0.0681354	0.0803361	0.062766	0.0718545	0.117798	0.0532088	0.0665357	0.0795085	0.0707222	0.0627974	0.043747	0.0313612	0.0341293	0.0247659	0.0640331	0.0683012
线性加权法
浙江省 指标层	国内旅游收入A1	旅游外汇收入A2	国内游客接待量A3	入境游客接待量A4	旅行社营业收入A5	星级酒店营业收入A6	旅行社数量A7	星级酒店数量A8	旅行社职工人数A9	星级酒店从业人员A10	国内旅游收入增长率A11	旅游外汇收入增长率A12	国内游客数量增长率A13	入境游客数量增长率A14	旅游R&D全时当量A15	旅游R&D经费占比A16
2008年	0	0.0285942	0	0.031263	0	0.0348389	0	0.0775781	0.0113745	0.0627974	0.0321018	0.0278925	0.0261569	0.0186223	0	0.00576093	0.356981
2009年	0.00301186	0.0305597	0.00421652	0.0331311	0.00453839	0.0361591	0.0036128	0.0795085	0.0100279	0.0611354	0.0378815	0.0265534	0.0312984	0.0186539	0.00393236	0.00865572	0.392877
2010年	0.00789043	0.0375213	0.0103606	0.0400232	0.0216136	0.0532088	0.00850512	0.073476	0.00410747	0.0398666	0.043747	0.0306034	0.0341293	0.0213797	0.00873023	0.0170685	0.452231
2011年	0.0136867	0.0435461	0.0161433	0.0453975	0.0304964	0.0520529	0.0168221	0.0668402	0.0183407	0.02653	0.0425468	0.0289224	0.0309218	0.0200419	0.0130266	0.0242997	0.489615
2012年	0.0191065	0.0495559	0.0219259	0.0509686	0.0370536	0.0430324	0.0225423	0.0628587	0.0362902	0.041805	0.0373942	0.0283597	0.0294057	0.0198366	0.0182229	0.0385747	0.556933
2013年	0.0248007	0.0519321	0.0271062	0.0509898	0.0316175	0.0446951	0.0259293	0.0600838	0.044287	0.0450226	0.0356471	0.0260472	0.0272765	0.0175641	0.0242632	0.0486144	0.585877
2014年	0.0306441	0.0554842	0.0322865	0.0549006	0.036114	0.0506315	0.0281121	0.0475362	0.0447684	0.0379157	0.0340179	0.0265769	0.0267066	0.0189858	0.0303172	0.0614576	0.616455
2015年	0.036707	0.0656809	0.0392739	0.0597911	0.0366426	0.0412981	0.0394397	0.0395733	0.01813	0.0322107	0.0328827	0.0295644	0.0263682	0.0192205	0.0366569	0.0453573	0.598797
2016年	0.0436092	0.0720075	0.045177	0.0663323	0.117798	0.0386615	0.0260422	0.0300419	0.0468899	0.0302319	0.0329659	0.02731	0.0259141	0.0196024	0.0406943	0.0597393	0.723017
2017年	0.0527388	0.0803361	0.052044	0.0718545	0.0977293	0.0347863	0.0281497	0.0201486	0.0420376	0.0255371	0.0348707	0.0278165	0.0263612	0.0191172	0.0458059	0.0683012	0.727635
2018年	0.0611313	0.0243747	0.0579471	0.0262577	0.0776609	0.0352072	0.0510307	0.0166497	0.0563799	0.0210821	0.0322057	0.00666887	0.0257055	0.0247659	0.0540217	0.0643747	0.635464
2019年	0.0681354	0.0250884	0.062766	0.0268798	0.0575924	0.0225673	0.0510307	0.0109792	0.0707222	0.0167509	0.029521	0.0255471	0.0234521	0.0179899	0.0640331	0.0598343	0.63289
2020年	0.0488172	0.000413488	0.0434904	0.000983895	0.000778784	0.00376014	0.0558102	0.0115824	0.0370876	0.00765025	0.00203007	0	0.00489037	0	0.0482798	0.0360692	0.301644
2021年	0.0371148	0.000813183	0.0242149	0.00125508	0.0107257	0.00499379	0.0602509	0.00434341	0.0185438	0.00337196	0	0.0313612	0	0.0197979	0.0302265	0.0126761	0.259689
2022年	0.0309186	0	0.0199562	0	0.00906877	0	0.0665357	0	0	0	0.0117205	0.014128	0.0144779	0.00827875	0.0272651	0	0.202349

## Sheet: 省级熵值法生态安全
指标层	2008年	2009年	2010年	2011年	2012年	2013年	2014年	2015年	2016年	2017年	2018年	2019年	2020年	2021年	2022年	单位
人均GDP增速B1	12.64	6.04	17.38	13.14	5.65	6.56	5.32	6.86	6.97	9.22	8.9	5.94	1.99	12.2	2.2	%
人口自然增长率B2	4.58	4.63	4.99	4.07	4.6	4.56	5	5.02	5.7	6.36	5.44	4.99	4.99	1	0.04
城镇化水平B3	29.77	30.41	30.94	31.41	31.71	64	64.87	65.8	67	68	68.9	70	72.17	72.7	73.4
废水排放总量B4	350377	365017	422618	420417	420960	419120	418262	433822	430856	453935	463895	476707	412130	437671	433723	万吨
SO2排放总量B5	715900	677000	665000	647000	611000	593000	574000	538000	268000	181000	129000	89000	50000	42000	40000	吨
固体废弃物排放量B6	1.67	0.78	2.54	0.34	0.4	0	0	0	0.28	0	0	0	0	0	0	万吨
森林覆盖率B7	60.65	60.65	60.58	60.58	60.58	60.82	60.91	60.96	61	61.17	61.15	61.15	61.17	61.24	61.27	%
绿地园林面积B8	69621	74362	79459	105200	122723	127927	132619	138039	154314	159214	167370	172280	179350	183218	189757	公顷
人均公园绿地面积B9	9.6	10.76	11.05	11.77	12.47	12.44	12.9	13.19	13.17	13.32	13.73	14.03	13.59	12.87	14.2	㎡
人均水资源总量B10	1824.35	1974.8	2943.61	1556.5	3010.39	1928.57	2326.92	2883.26	2692.32	1806.01	1733.14	2622.31	2025.25	2638.91	1828.13	m³（常住人口）
人均耕地面积B11	0.56	0.37	0.36	0.36	0.54	0.54	0.45	0.54	0.53	0.52	0.52	0.33	0.3	0.3	0.3	公顷（户籍人口）
人均林地面积B12	0.13	0.13	0.12	0.12	0.12	0.12	0.12	0.12	0.12	0.12	0.12	0.11	0.1	0.1	0.1
城镇生活污水处理率B13	75.1	78.88	82.74	85.09	87.5	89.28	90.68	91.95	93.89	94.98	95.75	96.95	97.69	97.92	98.14	%
生活垃圾无害化处理率B14	86.41	95.36	96.32	94.91	97.81	99.4	100	99.2	100	100	100	100	100	100	100
固体废物综合利用率B15	92.19	91.55	82.07	91.07	90.45	93.24	92.75	92.55	89.34	89.85	92.11	93.8	98.51	99.35	99.42
环保支出占GDP比重B16	2.42	2.26	1.2	0.74	1.08	1.04	1.18	1.03	1.38	0.87	1.18	0.43	0.34	0.27	0.29
指标层	人均GDP增速B1	人口自然增长率B2	城镇化水平B3	废水排放总量B4	SO2排放总量B5	固体废弃物排放量B6	森林覆盖率B7	绿地园林面积B8	人均公园绿地面积B9	人均水资源总量B10	人均耕地面积B11	人均林地面积B12	城镇生活污水处理率B13	生活垃圾无害化处理率B14	固体废物综合利用率B15	环保支出占GDP比重B16
2008年	12.64	4.58	29.77	350377	715900	1.67	60.65	69621	9.6	1824.35	0.56	0.13	75.1	86.41	92.19	2.42
2009年	6.04	4.63	30.41	365017	677000	0.78	60.65	74362	10.76	1974.8	0.37	0.13	78.88	95.36	91.55	2.26
2010年	17.38	4.99	30.94	422618	665000	2.54	60.58	79459	11.05	2943.61	0.36	0.12	82.74	96.32	82.07	1.2
2011年	13.14	4.07	31.41	420417	647000	0.34	60.58	105200	11.77	1556.5	0.36	0.12	85.09	94.91	91.07	0.74
2012年	5.65	4.6	31.71	420960	611000	0.4	60.58	122723	12.47	3010.39	0.54	0.12	87.5	97.81	90.45	1.08
2013年	6.56	4.56	64	419120	593000	0	60.82	127927	12.44	1928.57	0.54	0.12	89.28	99.4	93.24	1.04
2014年	5.32	5	64.87	418262	574000	0	60.91	132619	12.9	2326.92	0.45	0.12	90.68	100	92.75	1.18
2015年	6.86	5.02	65.8	433822	538000	0	60.96	138039	13.19	2883.26	0.54	0.12	91.95	99.2	92.55	1.03
2016年	6.97	5.7	67	430856	268000	0.28	61	154314	13.17	2692.32	0.53	0.12	93.89	100	89.34	1.38
2017年	9.22	6.36	68	453935	181000	0	61.17	159214	13.32	1806.01	0.52	0.12	94.98	100	89.85	0.87
2018年	8.9	5.44	68.9	463895	129000	0	61.15	167370	13.73	1733.14	0.52	0.12	95.75	100	92.11	1.18
2019年	5.94	4.99	70	476707	89000	0	61.15	172280	14.03	2622.31	0.33	0.11	96.95	100	93.8	0.43
2020年	1.99	4.99	72.17	412130	50000	0	61.17	179350	13.59	2025.25	0.3	0.1	97.69	100	98.51	0.34
2021年	12.2	1	72.7	437671	42000	0	61.24	183218	12.87	2638.91	0.3	0.1	97.92	100	99.35	0.27
2022年	2.2	0.04	73.4	433723	40000	0	61.27	189757	14.2	1828.13	0.3	0.1	98.14	100	99.42	0.29
单位	%			万吨	吨	万吨	%	公顷	㎡	m³（常住人口）	公顷（户籍人口）		%
max	17.38	6.36	73.4	476707	715900	2.54	61.27	189757	14.2	3010.39	0.56	0.13	98.14	100	99.42	2.42
min	1.99	0.04	29.77	350377	40000	0	60.58	69621	9.6	1556.5	0.3	0.1	75.1	86.41	82.07	0.27
极差	15.39	6.32	43.63	126330	675900	2.54	0.69	120136	4.6	1453.89	0.26	0.03	23.04	13.59	17.35	2.15
标准化
指标层	人均GDP增速B1	人口自然增长率B2	城镇化水平B3	废水排放总量B4	SO2排放总量B5	固体废弃物排放量B6	森林覆盖率B7	绿地园林面积B8	人均公园绿地面积B9	人均水资源总量B10	人均耕地面积B11	人均林地面积B12	城镇生活污水处理率B13	生活垃圾无害化处理率B14	固体废物综合利用率B15	环保支出占GDP比重B16
2008年	0.692008	0.718354	0	1	0	0.34252	0.101449	0	0	0.18423	1	1	0	0	0.583285	1
2009年	0.263158	0.726266	0.0146688	0.884113	0.0575529	0.692913	0.101449	0.0394636	0.252174	0.287711	0.269231	1	0.164062	0.658572	0.546398	0.925581
2010年	1	0.783228	0.0268164	0.428156	0.075307	0	0	0.0818905	0.315217	0.954068	0.230769	0.666667	0.331597	0.729213	0	0.432558
2011年	0.724496	0.637658	0.0375888	0.445579	0.101938	0.866142	0	0.296156	0.471739	0	0.230769	0.666667	0.433594	0.62546	0.518732	0.218605
2012年	0.237817	0.721519	0.0444648	0.441281	0.1552	0.84252	0	0.442016	0.623913	1	0.923077	0.666667	0.538194	0.838852	0.482997	0.376744
2013年	0.296946	0.71519	0.784552	0.455846	0.181832	1	0.347826	0.485333	0.617391	0.255913	0.923077	0.666667	0.615451	0.95585	0.643804	0.35814
2014年	0.216374	0.78481	0.804492	0.462638	0.209942	1	0.478261	0.524389	0.717391	0.529903	0.576923	0.666667	0.676215	1	0.615562	0.423256
2015年	0.316439	0.787975	0.825808	0.339468	0.263205	1	0.550725	0.569505	0.780435	0.912559	0.923077	0.666667	0.731337	0.941133	0.604035	0.353488
2016年	0.323587	0.89557	0.853312	0.362946	0.662672	0.889764	0.608696	0.704976	0.776087	0.781228	0.884615	0.666667	0.815538	1	0.41902	0.516279
2017年	0.469786	1	0.876232	0.180258	0.791389	1	0.855072	0.745763	0.808696	0.171615	0.846154	0.666667	0.862847	1	0.448415	0.27907
2018年	0.448993	0.85443	0.89686	0.101417	0.868324	1	0.826087	0.813653	0.897826	0.121495	0.846154	0.666667	0.896267	1	0.578674	0.423256
2019年	0.25666	0.783228	0.922072	0	0.927504	1	0.826087	0.854523	0.963043	0.733075	0.115385	0.333333	0.948351	1	0.676081	0.0744186
2020年	0	0.783228	0.971808	0.511177	0.985205	1	0.855072	0.913373	0.867391	0.322411	0	0	0.980469	1	0.94755	0.0325581
2021年	0.663418	0.151899	0.983956	0.309	0.997041	1	0.956522	0.94557	0.71087	0.744492	0	0	0.990451	1	0.995965	0
2022年	0.0136452	0	1	0.340252	1	1	1	1	1	0.18683	0	0	1	1	1	0.00930233
平移
指标层	人均GDP增速B1	人口自然增长率B2	城镇化水平B3	废水排放总量B4	SO2排放总量B5	固体废弃物排放量B6	森林覆盖率B7	绿地园林面积B8	人均公园绿地面积B9	人均水资源总量B10	人均耕地面积B11	人均林地面积B12	城镇生活污水处理率B13	生活垃圾无害化处理率B14	固体废物综合利用率B15	环保支出占GDP比重B16
2008年	0.692108	0.718454	0.0001	1.0001	0.0001	0.34262	0.101549	0.0001	0.0001	0.18433	1.0001	1.0001	0.0001	0.0001	0.583385	1.0001	0.0001
2009年	0.263258	0.726366	0.0147688	0.884213	0.0576529	0.693013	0.101549	0.0395636	0.252274	0.287811	0.269331	1.0001	0.164162	0.658672	0.546498	0.925681	0.0001
2010年	1.0001	0.783328	0.0269164	0.428256	0.075407	0.0001	0.0001	0.0819905	0.315317	0.954168	0.230869	0.666767	0.331697	0.729313	0.0001	0.432658	0.0001
2011年	0.724596	0.637758	0.0376888	0.445679	0.102038	0.866242	0.0001	0.296256	0.471839	0.0001	0.230869	0.666767	0.433694	0.62556	0.518832	0.218705	0.0001
2012年	0.237917	0.721619	0.0445648	0.441381	0.1553	0.84262	0.0001	0.442116	0.624013	1.0001	0.923177	0.666767	0.538294	0.838952	0.483097	0.376844	0.0001
2013年	0.297046	0.71529	0.784652	0.455946	0.181932	1.0001	0.347926	0.485433	0.617491	0.256013	0.923177	0.666767	0.615551	0.95595	0.643904	0.35824	0.0001
2014年	0.216474	0.78491	0.804592	0.462738	0.210042	1.0001	0.478361	0.524489	0.717491	0.530003	0.577023	0.666767	0.676315	1.0001	0.615662	0.423356	0.0001
2015年	0.316539	0.788075	0.825908	0.339568	0.263305	1.0001	0.550825	0.569605	0.780535	0.912659	0.923177	0.666767	0.731437	0.941233	0.604135	0.353588	0.0001
2016年	0.323687	0.89567	0.853412	0.363046	0.662772	0.889864	0.608796	0.705076	0.776187	0.781328	0.884715	0.666767	0.815638	1.0001	0.41912	0.516379	0.0001
2017年	0.469886	1.0001	0.876332	0.180358	0.791489	1.0001	0.855172	0.745863	0.808796	0.171715	0.846254	0.666767	0.862947	1.0001	0.448515	0.27917	0.0001
2018年	0.449093	0.85453	0.89696	0.101517	0.868424	1.0001	0.826187	0.813753	0.897926	0.121595	0.846254	0.666767	0.896367	1.0001	0.578774	0.423356	0.0001
2019年	0.25676	0.783328	0.922172	0.0001	0.927604	1.0001	0.826187	0.854623	0.963143	0.733175	0.115485	0.333433	0.948451	1.0001	0.676181	0.0745186	0.0001
2020年	0.0001	0.783328	0.971908	0.511277	0.985305	1.0001	0.855172	0.913473	0.867491	0.322511	0.0001	0.0001	0.980569	1.0001	0.94765	0.0326581	0.0001
2021年	0.663518	0.151999	0.984056	0.3091	0.997141	1.0001	0.956622	0.94567	0.71097	0.744592	0.0001	0.0001	0.990551	1.0001	0.996065	0.0001	0.0001
2022年	0.0137452	0.0001	1.0001	0.340352	1.0001	1.0001	1.0001	1.0001	1.0001	0.18693	0.0001	0.0001	1.0001	1.0001	1.0001	0.00940233	0.0001
sum	5.92483	10.3449	9.04413	6.26363	7.27861	12.6354	7.50875	8.41811	9.80367	7.18703	7.77073	8.33483	9.98587	12.7506	9.06202	5.42476
Pij
指标层	人均GDP增速B1	人口自然增长率B2	城镇化水平B3	废水排放总量B4	SO2排放总量B5	固体废弃物排放量B6	森林覆盖率B7	绿地园林面积B8	人均公园绿地面积B9	人均水资源总量B10	人均耕地面积B11	人均林地面积B12	城镇生活污水处理率B13	生活垃圾无害化处理率B14	固体废物综合利用率B15	环保支出占GDP比重B16
2008年	0.116815	0.0694504	1.10569e-05	0.159668	1.37389e-05	0.0271159	0.0135241	1.18791e-05	1.02003e-05	0.0256476	0.128701	0.11999	1.00141e-05	7.84278e-06	0.064377	0.184359
2009年	0.044433	0.0702152	0.00163297	0.141166	0.00792086	0.0548471	0.0135241	0.00469982	0.0257326	0.0400459	0.0346596	0.11999	0.0164395	0.0516582	0.0603064	0.17064
2010年	0.168798	0.0757215	0.00297612	0.0683719	0.0103601	7.9143e-06	1.33178e-05	0.00973978	0.0321632	0.132763	0.0297101	0.0799976	0.0332166	0.0571984	1.10351e-05	0.0797562
2011年	0.122298	0.0616498	0.00416721	0.0711535	0.0140189	0.068557	1.33178e-05	0.0351927	0.0481288	1.3914e-05	0.0297101	0.0799976	0.0434307	0.0490613	0.0572535	0.040316
2012年	0.0401559	0.0697563	0.00492748	0.0704672	0.0213366	0.0666874	1.33178e-05	0.0525196	0.0636509	0.139153	0.118802	0.0799976	0.0539056	0.0657972	0.0533101	0.0694675
2013年	0.0501358	0.0691445	0.0867581	0.0727926	0.0249954	0.0791509	0.0463361	0.0576653	0.0629857	0.0356216	0.118802	0.0799976	0.0616422	0.0749731	0.0710553	0.0660379
2014年	0.0365368	0.0758744	0.0889629	0.0738769	0.0288575	0.0791509	0.0637072	0.0623048	0.073186	0.0737443	0.074256	0.0799976	0.0677272	0.0784356	0.0679387	0.0780415
2015年	0.0534259	0.0761804	0.0913198	0.0542127	0.0361751	0.0791509	0.0733577	0.0676642	0.0796166	0.126987	0.118802	0.0799976	0.0732471	0.0738189	0.0666667	0.0651805
2016年	0.0546323	0.0865812	0.0943609	0.057961	0.0910575	0.0704265	0.0810782	0.083757	0.0791731	0.108714	0.113852	0.0799976	0.0816792	0.0784356	0.0462502	0.0951894
2017年	0.0793079	0.0966761	0.0968951	0.0287945	0.108742	0.0791509	0.11389	0.0886022	0.0824992	0.0238924	0.108903	0.0799976	0.0864168	0.0784356	0.0494939	0.0514622
2018年	0.0757985	0.0826044	0.0991759	0.0162074	0.119312	0.0791509	0.11003	0.0966669	0.0915908	0.0169186	0.108903	0.0799976	0.0897635	0.0784356	0.0638681	0.0780415
2019年	0.0433363	0.0757215	0.101964	1.59652e-05	0.127442	0.0791509	0.11003	0.101522	0.0982431	0.102014	0.0148615	0.0400048	0.0949792	0.0784356	0.074617	0.0137368
2020年	1.68781e-05	0.0757215	0.107463	0.0816263	0.13537	0.0791509	0.11389	0.108513	0.0884863	0.044874	1.28688e-05	1.19978e-05	0.0981956	0.0784356	0.104574	0.0060202
2021年	0.111989	0.0146932	0.108806	0.0493484	0.136996	0.0791509	0.127401	0.112338	0.0725207	0.103602	1.28688e-05	1.19978e-05	0.0991953	0.0784356	0.109917	1.8434e-05
2022年	0.00231994	9.66664e-06	0.11058	0.0543378	0.137403	0.0791509	0.133191	0.118803	0.102013	0.0260093	1.28688e-05	1.19978e-05	0.100151	0.0784356	0.110362	0.00173323
K	-0.369269
	-2.45387	-2.59784	-2.35829	-2.51442	-2.33375	-2.61514	-2.34147	-2.48288	-2.58439	-2.44001	-2.33498	-2.45651	-2.56369	-2.62763	-2.59958	-2.36285
Ej	0.906138	0.959301	0.870846	0.928497	0.861784	0.965691	0.864634	0.916852	0.954337	0.901022	0.862238	0.907113	0.946692	0.970302	0.959946	0.872527
Dj	0.0938621	0.0406987	0.129154	0.0715033	0.138216	0.0343089	0.135366	0.0831475	0.0456627	0.0989782	0.137762	0.0928872	0.0533084	0.0296977	0.0400542	0.127473
W	0.0694205	0.0301008	0.0955226	0.0528839	0.102225	0.0253749	0.100117	0.061496	0.0337722	0.0732044	0.101889	0.0686995	0.0394269	0.0219644	0.0296241	0.0942794
线性加权法
指标层	人均GDP增速B1	人口自然增长率B2	城镇化水平B3	废水排放总量B4	SO2排放总量B5	固体废弃物排放量B6	森林覆盖率B7	绿地园林面积B8	人均公园绿地面积B9	人均水资源总量B10	人均耕地面积B11	人均林地面积B12	城镇生活污水处理率B13	生活垃圾无害化处理率B14	固体废物综合利用率B15	环保支出占GDP比重B16	sum
2008年	0.0480395	0.021623	0	0.0528839	0	0.00869141	0.0101568	0	0	0.0134864	0.101889	0.0686995	0	0	0.0172793	0.0942794	0.437028
2009年	0.0182685	0.0218612	0.0014012	0.0467553	0.00588333	0.0175826	0.0101568	0.00242685	0.00851646	0.0210617	0.0274316	0.0686995	0.00646848	0.0144652	0.0161866	0.0872633	0.374429
2010年	0.0694205	0.0235758	0.00256157	0.0226426	0.00769824	0	0	0.00503594	0.0106456	0.069842	0.0235128	0.0457996	0.0130739	0.0160167	0	0.0407813	0.350606
2011年	0.0502949	0.019194	0.00359058	0.023564	0.0104206	0.0219783	0	0.0182124	0.0159316	0	0.0235128	0.0457996	0.0170953	0.0137379	0.015367	0.0206099	0.299309
2012年	0.0165094	0.0217183	0.00424739	0.0233366	0.0158653	0.0213789	0	0.0271822	0.0210709	0.0732044	0.0940512	0.0457996	0.0212193	0.0184249	0.0143084	0.0355192	0.453836
2013年	0.0206141	0.0215278	0.0749424	0.0241069	0.0185877	0.0253749	0.0348233	0.029846	0.0208506	0.018734	0.0940512	0.0457996	0.0242653	0.0209947	0.0190721	0.0337652	0.527356
2014年	0.0150208	0.0236234	0.0768472	0.0244661	0.0214613	0.0253749	0.047882	0.0322478	0.0242279	0.0387912	0.058782	0.0457996	0.0266611	0.0219644	0.0182355	0.0399043	0.541289
2015年	0.0219674	0.0237186	0.0788833	0.0179524	0.026906	0.0253749	0.0551369	0.0350222	0.026357	0.0668033	0.0940512	0.0457996	0.0288344	0.0206715	0.017894	0.0333267	0.618699
2016年	0.0224635	0.0269573	0.0815105	0.019194	0.0677415	0.0225777	0.0609407	0.0433532	0.0262101	0.0571893	0.0901324	0.0457996	0.0321542	0.0219644	0.0124131	0.0486745	0.679276
2017年	0.0326127	0.0301008	0.0836999	0.00953275	0.0808996	0.0253749	0.0856072	0.0458614	0.0273114	0.012563	0.0862136	0.0457996	0.0340194	0.0219644	0.0132839	0.0263105	0.661155
2018年	0.0311693	0.025719	0.0856704	0.00536332	0.0887642	0.0253749	0.0827053	0.0500364	0.0303215	0.00889395	0.0862136	0.0457996	0.0353371	0.0219644	0.0171427	0.0399043	0.68038
2019年	0.0178175	0.0235758	0.0880787	0	0.0948139	0.0253749	0.0827053	0.0525497	0.0325241	0.0536643	0.0117564	0.0228998	0.0373905	0.0219644	0.0200283	0.00701614	0.59216
2020年	0	0.0235758	0.0928296	0.027033	0.100712	0.0253749	0.0856072	0.0561688	0.0292937	0.0236019	0	0	0.0386569	0.0219644	0.0280704	0.00306956	0.555958
2021年	0.0460548	0.00457227	0.09399	0.0163411	0.101922	0.0253749	0.095764	0.0581487	0.0240076	0.0545001	0	0	0.0390504	0.0219644	0.0295046	0	0.611195
2022年	0.000947258	0	0.0955226	0.0179938	0.102225	0.0253749	0.100117	0.061496	0.0337722	0.0136768	0	0	0.0394269	0.0219644	0.0296241	0.000877018	0.543018

## Sheet: 省级耦合度
浙江省 指标层	旅游产业得分	生态安全得分	耦合度C	耦合度T	耦合度D
2008年	0.356981	0.437028	0.994905	0.405009	0.63478
2009年	0.392877	0.374429	0.999711	0.381808	0.617817
2010年	0.452231	0.350606	0.991956	0.391256	0.622984
2011年	0.489615	0.299309	0.97047	0.375431	0.60361
2012年	0.556933	0.453836	0.994785	0.495075	0.701778
2013年	0.585877	0.527356	0.998617	0.550764	0.741622
2014年	0.616455	0.541289	0.99789	0.571356	0.755083
2015年	0.598797	0.618699	0.999866	0.610739	0.781445
2016年	0.723017	0.679276	0.999513	0.696773	0.834526
2017年	0.727635	0.661155	0.998854	0.687747	0.82883
2018年	0.635464	0.68038	0.999417	0.662413	0.813651
2019年	0.63289	0.59216	0.999447	0.608452	0.779818
2020年	0.301644	0.555958	0.95502	0.454233	0.658636
2021年	0.259689	0.611195	0.914927	0.470593	0.656169
2022年	0.202349	0.543018	0.889442	0.40675	0.601482

## Sheet: 2010年市级旅游产业障碍度
	杭州市	宁波市	温州市	嘉兴市	湖州市	绍兴市	金华市	衢州市	舟山市	台州市	丽水市	单位
国内旅游收入A1	910.9	610.7	317.33	280.62	205.61	305.84	258.01	91.56	133.14	269.42	97.11	亿元
旅游外汇收入A2	16.9	5.9	2.11	2.26	1.26	1.85	3.77	0.51	1.31	0.56	2.89	亿美元
国内游客接待量A3	6304.89	4624	3487.14	3070.14	2855.68	3436.44	2882.71	1639.28	2113.32	3285.66	2065.3	万人次
入境游客接待量A4	275.71	95.2	39.16	66.41	33.17	52.28	62.74	9.88	25.68	10.29	12.92
旅行社营业收入A5	56.29	35.72	18.2	16.25	11.75	17.47	15.56	5.23	7.8	15.01	6.4	亿元
星级酒店营业收入A6	91.16	36.36	20.04	13.3	9.62	14.31	12.74	4.28	6.38	12.29	5.24
旅行社数量A7	504	279	125	111	80	120	107	36	108	126	44	家
星级酒店数量A8	236	206	99	54	48	94	84	45	61	60	52
旅行社职工人数A9	0.68	0.38	0.17	0.15	0.11	0.16	0.14	0.05	0.15	0.17	0.06	万人
星级酒店从业人员A10	2.82	2.37	1.21	0.51	0.45	0.88	0.79	0.42	0.57	0.56	0.49
国内旅游收入增长率A11	28.49	22	25.1	30.09	29.3	26.25	27.2	31.6	22.43	18.87	36.5	%
旅游外汇收入增长率A12	22.47	21.4	18.6	18.04	27	24.7	23.8	21.1	15.1	13.4	24.3
国内游客数量增长率A13	23.77	16.7	19	23.2	23	20.52	22.4	28.9	22.12	13.8	34.1
入境游客数量增长率A14	19.67	18.9	18.8	19.29	31.9	21.1	18	15.9	14.9	18.96	22.7
旅游R&D全时当量A15	1.15	0.57	0.21	0.3	0.13	0.25	0.2	0.03	0.06	0.23	0.03	万人
旅游R&D经费占比A16	4.82	1.7	1.18	3.15	2.71	2.94	1.99	0.56	1.38	1.64	0.34	%
	国内旅游收入A1	旅游外汇收入A2	国内游客接待量A3	入境游客接待量A4	旅行社营业收入A5	星级酒店营业收入A6	旅行社数量A7	星级酒店数量A8	旅行社职工人数A9	星级酒店从业人员A10	国内旅游收入增长率A11	旅游外汇收入增长率A12	国内游客数量增长率A13	入境游客数量增长率A14	旅游R&D全时当量A15	旅游R&D经费占比A16
杭州市	910.9	16.9	6304.89	275.71	56.29	91.16	504	236	0.68	2.82	28.49	22.47	23.77	19.67	1.15	4.82
宁波市	610.7	5.9	4624	95.2	35.72	36.36	279	206	0.38	2.37	22	21.4	16.7	18.9	0.57	1.7
温州市	317.33	2.11	3487.14	39.16	18.2	20.04	125	99	0.17	1.21	25.1	18.6	19	18.8	0.21	1.18
嘉兴市	280.62	2.26	3070.14	66.41	16.25	13.3	111	54	0.15	0.51	30.09	18.04	23.2	19.29	0.3	3.15
湖州市	205.61	1.26	2855.68	33.17	11.75	9.62	80	48	0.11	0.45	29.3	27	23	31.9	0.13	2.71
绍兴市	305.84	1.85	3436.44	52.28	17.47	14.31	120	94	0.16	0.88	26.25	24.7	20.52	21.1	0.25	2.94
金华市	258.01	3.77	2882.71	62.74	15.56	12.74	107	84	0.14	0.79	27.2	23.8	22.4	18	0.2	1.99
衢州市	91.56	0.51	1639.28	9.88	5.23	4.28	36	45	0.05	0.42	31.6	21.1	28.9	15.9	0.03	0.56
舟山市	133.14	1.31	2113.32	25.68	7.8	6.38	108	61	0.15	0.57	22.43	15.1	22.12	14.9	0.06	1.38
台州市	269.42	0.56	3285.66	10.29	15.01	12.29	126	60	0.17	0.56	18.87	13.4	13.8	18.96	0.23	1.64
丽水市	97.11	2.89	2065.3	12.92	6.4	5.24	44	52	0.06	0.49	36.5	24.3	34.1	22.7	0.03	0.34
单位	亿元	亿美元	万人次		亿元		家		万人		%				万人	%
max	910.9	16.9	6304.89	275.71	56.29	91.16	504	236	0.68	2.82	36.5	27	34.1	31.9	1.15	4.82
min	91.56	0.51	1639.28	9.88	5.23	4.28	36	45	0.05	0.42	18.87	13.4	13.8	14.9	0.03	0.34
极差	819.34	16.39	4665.61	265.83	51.06	86.88	468	191	0.63	2.4	17.63	13.6	20.3	17	1.12	4.48
标准化
国内旅游收入A1	旅游外汇收入A2	国内游客接待量A3	入境游客接待量A4	旅行社营业收入A5	星级酒店营业收入A6	旅行社数量A7	星级酒店数量A8	旅行社职工人数A9	星级酒店从业人员A10	国内旅游收入增长率A11	旅游外汇收入增长率A12	国内游客数量增长率A13	入境游客数量增长率A14	旅游R&D全时当量A15	旅游R&D经费占比A16
杭州市	1	1	1	1	1	1	1	1	1	1	0.545661	0.666912	0.491133	0.280588	1	1
宁波市	0.633608	0.328859	0.639728	0.320957	0.597141	0.369245	0.519231	0.842932	0.52381	0.8125	0.177538	0.588235	0.142857	0.235294	0.482143	0.303571
温州市	0.275551	0.0976205	0.39606	0.110146	0.254015	0.1814	0.190171	0.282723	0.190476	0.329167	0.353375	0.382353	0.256158	0.229412	0.160714	0.1875
嘉兴市	0.230747	0.106772	0.306682	0.212655	0.215825	0.103821	0.160256	0.0471204	0.15873	0.0375	0.636415	0.341176	0.463054	0.258235	0.241071	0.627232
湖州市	0.139197	0.0457596	0.260716	0.0876124	0.127693	0.0614641	0.0940171	0.0157068	0.0952381	0.0125	0.591605	1	0.453202	1	0.0892857	0.529018
绍兴市	0.261528	0.0817572	0.385193	0.1595	0.239718	0.115447	0.179487	0.256545	0.174603	0.191667	0.418605	0.830882	0.331034	0.364706	0.196429	0.580357
金华市	0.203151	0.198902	0.26651	0.198849	0.202311	0.0973757	0.151709	0.204188	0.142857	0.154167	0.47249	0.764706	0.423645	0.182353	0.151786	0.368304
衢州市	0	0	0	0	0	0	0	0	0	0	0.722065	0.566176	0.743842	0.0588235	0	0.0491071
舟山市	0.0507482	0.0488103	0.101603	0.0594365	0.0503329	0.0241713	0.153846	0.0837696	0.15873	0.0625	0.201929	0.125	0.409852	0	0.0267857	0.232143
台州市	0.217077	0.00305064	0.352876	0.00154234	0.191539	0.0921961	0.192308	0.078534	0.190476	0.0583333	0	0	0	0.238824	0.178571	0.290179
丽水市	0.00677374	0.14521	0.0913107	0.0114359	0.0229142	0.0110497	0.017094	0.0366492	0.015873	0.0291667	1	0.801471	1	0.458824	0	0
平移
国内旅游收入A1	旅游外汇收入A2	国内游客接待量A3	入境游客接待量A4	旅行社营业收入A5	星级酒店营业收入A6	旅行社数量A7	星级酒店数量A8	旅行社职工人数A9	星级酒店从业人员A10	国内旅游收入增长率A11	旅游外汇收入增长率A12	国内游客数量增长率A13	入境游客数量增长率A14	旅游R&D全时当量A15	旅游R&D经费占比A16
杭州市	1.0001	1.0001	1.0001	1.0001	1.0001	1.0001	1.0001	1.0001	1.0001	1.0001	0.545761	0.667012	0.491233	0.280688	1.0001	1.0001	0.0001
宁波市	0.633708	0.328959	0.639828	0.321057	0.597241	0.369345	0.519331	0.843032	0.52391	0.8126	0.177638	0.588335	0.142957	0.235394	0.482243	0.303671	0.0001
温州市	0.275651	0.0977205	0.39616	0.110246	0.254115	0.1815	0.190271	0.282823	0.190576	0.329267	0.353475	0.382453	0.256258	0.229512	0.160814	0.1876	0.0001
嘉兴市	0.230847	0.106872	0.306782	0.212755	0.215925	0.103921	0.160356	0.0472204	0.15883	0.0376	0.636515	0.341276	0.463154	0.258335	0.241171	0.627332	0.0001
湖州市	0.139297	0.0458596	0.260816	0.0877124	0.127793	0.0615641	0.0941171	0.0158068	0.0953381	0.0126	0.591705	1.0001	0.453302	1.0001	0.0893857	0.529118	0.0001
绍兴市	0.261628	0.0818572	0.385293	0.1596	0.239818	0.115547	0.179587	0.256645	0.174703	0.191767	0.418705	0.830982	0.331134	0.364806	0.196529	0.580457	0.0001
金华市	0.203251	0.199002	0.26661	0.198949	0.202411	0.0974757	0.151809	0.204288	0.142957	0.154267	0.47259	0.764806	0.423745	0.182453	0.151886	0.368404	0.0001
衢州市	0.0001	0.0001	0.0001	0.0001	0.0001	0.0001	0.0001	0.0001	0.0001	0.0001	0.722165	0.566276	0.743942	0.0589235	0.0001	0.0492071	0.0001
舟山市	0.0508482	0.0489103	0.101703	0.0595365	0.0504329	0.0242713	0.153946	0.0838696	0.15883	0.0626	0.202029	0.1251	0.409952	0.0001	0.0268857	0.232243	0.0001
台州市	0.217177	0.00315064	0.352976	0.00164234	0.191639	0.0922961	0.192408	0.078634	0.190576	0.0584333	0.0001	0.0001	0.0001	0.238924	0.178671	0.290279	0.0001
丽水市	0.00687374	0.14531	0.0914107	0.0115359	0.0230142	0.0111497	0.017194	0.0367492	0.015973	0.0292667	1.0001	0.801571	1.0001	0.458924	0.0001	0.0001	0.0001
sum	3.01948	2.05784	3.80178	2.16323	2.90259	2.05727	2.65922	2.84927	2.65189	2.6886	5.12078	6.06801	4.71588	3.30816	2.52789	4.16851
Pij
国内旅游收入A1	旅游外汇收入A2	国内游客接待量A3	入境游客接待量A4	旅行社营业收入A5	星级酒店营业收入A6	旅行社数量A7	星级酒店数量A8	旅行社职工人数A9	星级酒店从业人员A10	国内旅游收入增长率A11	旅游外汇收入增长率A12	国内游客数量增长率A13	入境游客数量增长率A14	旅游R&D全时当量A15	旅游R&D经费占比A16
杭州市	0.331216	0.485995	0.263061	0.462317	0.344555	0.48613	0.376088	0.351002	0.377127	0.371978	0.106578	0.109923	0.104166	0.0848473	0.395627	0.239918
宁波市	0.209873	0.159856	0.168297	0.148415	0.205761	0.179532	0.195294	0.295877	0.197561	0.302239	0.0346897	0.0969568	0.030314	0.0711556	0.190769	0.0728489
温州市	0.0912909	0.0474869	0.104204	0.0509633	0.0875477	0.0882236	0.0715514	0.0992615	0.0718642	0.122468	0.0690275	0.0630277	0.0543393	0.0693775	0.0636161	0.0450041
嘉兴市	0.0764525	0.0519342	0.0806944	0.0983503	0.0743903	0.0505142	0.0603021	0.0165728	0.0598931	0.013985	0.1243	0.0562419	0.0982116	0.0780904	0.0954044	0.150493
湖州市	0.0461329	0.0222853	0.0686037	0.0405469	0.0440272	0.0299251	0.0353927	0.00554767	0.0359509	0.00468645	0.11555	0.164815	0.0961225	0.302313	0.0353599	0.126932
绍兴市	0.0866465	0.0397782	0.101345	0.0737786	0.0826221	0.056165	0.0675338	0.0900739	0.0658787	0.0713258	0.0817658	0.136945	0.0702169	0.110275	0.0777442	0.139248
金华市	0.0673133	0.0967041	0.0701276	0.0919683	0.0697347	0.0473811	0.057088	0.0716986	0.0539076	0.0573781	0.0922886	0.126039	0.089855	0.0551524	0.0600841	0.0883777
衢州市	3.31183e-05	4.85946e-05	2.63035e-05	4.62271e-05	3.4452e-05	4.86081e-05	3.7605e-05	3.50967e-05	3.77089e-05	3.71941e-05	0.141026	0.0933216	0.157753	0.0178116	3.95588e-05	0.0118045
舟山市	0.01684	0.0237677	0.0267514	0.027522	0.0173752	0.0117978	0.0578915	0.0294355	0.0598931	0.0232835	0.0394527	0.0206163	0.0869302	3.02283e-05	0.0106357	0.0557136
台州市	0.0719253	0.00153104	0.0928449	0.000759206	0.0660236	0.0448634	0.0723549	0.027598	0.0718642	0.0217337	1.95283e-05	1.64799e-05	2.1205e-05	0.0722225	0.0706802	0.069636
丽水市	0.00227647	0.070613	0.0240442	0.0053327	0.00792886	0.00541967	0.00646581	0.0128978	0.00602325	0.0108855	0.195302	0.132098	0.212071	0.138725	3.95588e-05	2.39894e-05
K	-0.417032
Ej	0.799248	0.69539	0.875598	0.706481	0.799345	0.690438	0.790889	0.716862	0.788676	0.68568	0.915755	0.919325	0.912754	0.868293	0.752512	0.879054
Dj	0.200752	0.30461	0.124402	0.293519	0.200655	0.309562	0.209111	0.283138	0.211324	0.31432	0.0842454	0.0806752	0.0872457	0.131707	0.247488	0.120946
W	0.0626627	0.0950807	0.0388307	0.0916188	0.0626323	0.0966264	0.0652718	0.0883783	0.0659626	0.0981115	0.0262963	0.0251819	0.0272328	0.0411108	0.0772508	0.0377519
指标偏离度
	国内旅游收入A1	旅游外汇收入A2	国内游客接待量A3	入境游客接待量A4	旅行社营业收入A5	星级酒店营业收入A6	旅行社数量A7	星级酒店数量A8	旅行社职工人数A9	星级酒店从业人员A10	国内旅游收入增长率A11	旅游外汇收入增长率A12	国内游客数量增长率A13	入境游客数量增长率A14	旅游R&D全时当量A15	旅游R&D经费占比A16
杭州市	0	0	0	0	0	0	0	0	0	0	0.454339	0.333088	0.508867	0.719412	0	0
宁波市	0.366392	0.671141	0.360272	0.679043	0.402859	0.630755	0.480769	0.157068	0.47619	0.1875	0.822462	0.411765	0.857143	0.764706	0.517857	0.696429
温州市	0.724449	0.902379	0.60394	0.889854	0.745985	0.8186	0.809829	0.717277	0.809524	0.670833	0.646625	0.617647	0.743842	0.770588	0.839286	0.8125
嘉兴市	0.769253	0.893228	0.693318	0.787345	0.784175	0.896179	0.839744	0.95288	0.84127	0.9625	0.363585	0.658824	0.536946	0.741765	0.758929	0.372768
湖州市	0.860803	0.95424	0.739284	0.912388	0.872307	0.938536	0.905983	0.984293	0.904762	0.9875	0.408395	0	0.546798	0	0.910714	0.470982
绍兴市	0.738472	0.918243	0.614807	0.8405	0.760282	0.884553	0.820513	0.743455	0.825397	0.808333	0.581395	0.169118	0.668966	0.635294	0.803571	0.419643
金华市	0.796849	0.801098	0.73349	0.801151	0.797689	0.902624	0.848291	0.795812	0.857143	0.845833	0.52751	0.235294	0.576355	0.817647	0.848214	0.631696
衢州市	1	1	1	1	1	1	1	1	1	1	0.277935	0.433824	0.256158	0.941176	1	0.950893
舟山市	0.949252	0.95119	0.898397	0.940564	0.949667	0.975829	0.846154	0.91623	0.84127	0.9375	0.798071	0.875	0.590148	1	0.973214	0.767857
台州市	0.782923	0.996949	0.647124	0.998458	0.808461	0.907804	0.807692	0.921466	0.809524	0.941667	1	1	1	0.761176	0.821429	0.709821
丽水市	0.993226	0.85479	0.908689	0.988564	0.977086	0.98895	0.982906	0.963351	0.984127	0.970833	0	0.198529	0	0.541176	1	1
加权指标偏离度
	国内旅游收入A1	旅游外汇收入A2	国内游客接待量A3	入境游客接待量A4	旅行社营业收入A5	星级酒店营业收入A6	旅行社数量A7	星级酒店数量A8	旅行社职工人数A9	星级酒店从业人员A10	国内旅游收入增长率A11	旅游外汇收入增长率A12	国内游客数量增长率A13	入境游客数量增长率A14	旅游R&D全时当量A15	旅游R&D经费占比A16	sum
杭州市	0	0	0	0	0	0	0	0	0	0	0.0119474	0.00838779	0.0138579	0.0295756	0	0	0.0637687
宁波市	0.0229591	0.0638125	0.0139896	0.0622131	0.025232	0.0609476	0.0313807	0.0138814	0.0314108	0.0183959	0.0216277	0.010369	0.0233424	0.0314377	0.0400049	0.0262915	0.497296
温州市	0.0453959	0.0857988	0.0234514	0.0815274	0.0467228	0.0790984	0.052859	0.0633918	0.0533983	0.0658164	0.0170038	0.0155535	0.0202569	0.0316795	0.0648355	0.0306735	0.777463
嘉兴市	0.0482035	0.0849287	0.026922	0.0721356	0.0491147	0.0865945	0.0548115	0.0842139	0.0554923	0.0944323	0.00956092	0.0165904	0.0146225	0.0304946	0.0586278	0.0140727	0.800818
湖州市	0.0539402	0.0907298	0.0287069	0.0835918	0.0546346	0.0906873	0.0591351	0.0869902	0.0596804	0.0968851	0.0107393	0	0.0148908	0	0.0703534	0.0177805	0.818745
绍兴市	0.0462747	0.0873071	0.0238734	0.0770056	0.0476182	0.0854712	0.0535563	0.0657053	0.0544453	0.0793068	0.0152885	0.0042587	0.0182178	0.0261175	0.0620765	0.0158423	0.762365
金华市	0.0499327	0.076169	0.0284819	0.0734005	0.0499611	0.0872173	0.0553694	0.0703325	0.0565394	0.0829859	0.0138715	0.00592515	0.0156957	0.0336141	0.0655252	0.0238478	0.788869
衢州市	0.0626627	0.0950807	0.0388307	0.0916188	0.0626323	0.0966264	0.0652718	0.0883783	0.0659626	0.0981115	0.00730866	0.0109245	0.00697588	0.0386925	0.0772508	0.0358981	0.942226
舟山市	0.0594827	0.0904398	0.0348853	0.0861733	0.0594798	0.0942908	0.0552299	0.0809749	0.0554923	0.0919795	0.0209863	0.0220341	0.0160714	0.0411108	0.0751815	0.0289881	0.912801
台州市	0.04906	0.0947906	0.0251283	0.0914775	0.0506357	0.0877178	0.0527195	0.0814376	0.0533983	0.0923883	0.0262963	0.0251819	0.0272328	0.0312926	0.063456	0.0267971	0.87901
丽水市	0.0622382	0.081274	0.035285	0.090571	0.0611971	0.0955587	0.064156	0.0851393	0.0649156	0.0952499	0	0.00499934	0	0.0222482	0.0772508	0.0377519	0.877835
障碍度
	国内旅游收入A1	旅游外汇收入A2	国内游客接待量A3	入境游客接待量A4	旅行社营业收入A5	星级酒店营业收入A6	旅行社数量A7	星级酒店数量A8	旅行社职工人数A9	星级酒店从业人员A10	国内旅游收入增长率A11	旅游外汇收入增长率A12	国内游客数量增长率A13	入境游客数量增长率A14	旅游R&D全时当量A15	旅游R&D经费占比A16
杭州市	0	0	0	0	0	0	0	0	0	0	0.187356	0.131535	0.217314	0.463795	0	0
宁波市	0.046168	0.128319	0.0281314	0.125103	0.0507384	0.122558	0.0631026	0.0279138	0.0631631	0.0369919	0.0434906	0.0208508	0.0469386	0.0632173	0.0804448	0.052869
温州市	0.0583898	0.110357	0.030164	0.104863	0.0600965	0.101739	0.0679891	0.0815367	0.0686827	0.0846554	0.0218709	0.0200055	0.0260551	0.0407473	0.0833937	0.0394533
嘉兴市	0.0601928	0.106052	0.0336181	0.0900774	0.0613307	0.108133	0.0684444	0.10516	0.0692946	0.11792	0.0119389	0.0207168	0.0182595	0.0380793	0.0732099	0.0175729
湖州市	0.0658815	0.110816	0.035062	0.102097	0.0667296	0.110764	0.0722265	0.106248	0.0728925	0.118334	0.0131167	0	0.0181874	0	0.0859283	0.0217168
绍兴市	0.0606988	0.114521	0.0313149	0.101009	0.0624611	0.112113	0.0702502	0.0861862	0.0714163	0.104027	0.0200541	0.00558617	0.0238964	0.0342585	0.0814262	0.0207805
金华市	0.0632965	0.0965546	0.0361047	0.0930452	0.0633325	0.11056	0.0701883	0.0891561	0.0716714	0.105196	0.0175841	0.00751094	0.0198965	0.0426106	0.0830622	0.0302303
衢州市	0.0665049	0.100911	0.0412116	0.0972365	0.0664727	0.102551	0.069274	0.0937974	0.0700072	0.104127	0.00775681	0.0115943	0.00740362	0.041065	0.0819875	0.0380992
舟山市	0.065165	0.0990794	0.0382179	0.0944054	0.0651619	0.103298	0.060506	0.0887104	0.0607935	0.100766	0.0229911	0.0241391	0.0176067	0.0450381	0.0823636	0.0317573
台州市	0.0558128	0.107838	0.028587	0.104069	0.0576054	0.0997915	0.059976	0.0926469	0.0607482	0.105105	0.0299158	0.028648	0.0309812	0.0355998	0.0721903	0.0304856
丽水市	0.0708997	0.0925845	0.0401955	0.103175	0.0697137	0.108857	0.0730843	0.0969878	0.0739496	0.108505	0	0.00569508	0	0.0253444	0.0880015	0.0430057

## Sheet: 2010市级生态安全耦合度
	杭州市	宁波市	温州市	嘉兴市	湖州市	绍兴市	金华市	衢州市	舟山市	台州市	丽水市	单位
人均GDP增速B1	9.7	23.01	2.48	14.67	15.34	12.16	15.2	28.36	12.61	14.97	29.6	%（常住人口）
人口自然增长率B2	3.41	2.34	10.1	0.67	0.09	-0.61	3.63	3.55	-1.21	6.22	7.58	%
城镇化水平B3	73.25	68.31	66.02	53.33	52.89	58.58	59.02	44.13	63.59	55.54	48.4	%（常住人口）
废水排放总量B4	80468	47983	40300	31660	10887.8	41704.5	12309.3	12255.7	3895.71	19510.3	14025.1	万吨
SO2排放总量B5	88682	110900	63000	67198	50976	62006	28045	26322	23898	25309.7	15200	吨
固体废弃物排放量B6	0.18	0.03	0.27	0.02	0	0	0	0	0	0	6.88	万吨
森林覆盖率B7	64.56	50.2	60.03	12.7	50.9	54.03	60.44	71.5	50	59.3	80.79	%
绿地园林面积B8	17503	15780	5715	9540	7630	9925	14320	4004	2233	9502	3374	公顷
人均公园绿地面积B9	15.12	10.62	6.28	12.59	14.79	5.79	8.21	11.49	15.45	10.14	11.55	㎡
人均水资源总量B10	2762.9	1579.57	2441	879.4	1781	1730	3261.89	6319	777.2	2047	11670	m³（常住人口）
人均耕地面积B11	0.03	0.04	0.03	0.06					0.02	0.03	0.06	公顷（户籍人口）
人均林地面积B12	0.17	0.06	0.01						0.05	0.09	0.53	公顷（户籍人口）
城镇生活污水处理率B13	92	82.81	65.8	84.8	84.8	87.96	70.2	75.65	74.8	75.6	66.9	%
生活垃圾无害化处理率B14	100	98.64	89.14	100	100	100	99.31	100	100	96.99	99.57	%
固体废物综合利用率B15	94.13	94.88	95.35	97.6	96.49	93.15	98.59	97.24	99.75	97.6	94.99	%（工业）
环保支出占GDP比重B16	0.23	0.38	0.22	0.33	0.52	0.21	0.27	0.52	0.36	0.21	0.47	%
	人均GDP增速B1	人口自然增长率B2	城镇化水平B3	废水排放总量B4	SO2排放总量B5	固体废弃物排放量B6	森林覆盖率B7	绿地园林面积B8	人均公园绿地面积B9	人均水资源总量B10	人均耕地面积B11	人均林地面积B12	城镇生活污水处理率B13	生活垃圾无害化处理率B14	固体废物综合利用率B15	环保支出占GDP比重B16
杭州市	9.7	3.41	73.25	80468	88682	0.18	64.56	17503	15.12	2762.9	0.03	0.17	92	100	94.13	0.23
宁波市	23.01	2.34	68.31	47983	110900	0.03	50.2	15780	10.62	1579.57	0.04	0.06	82.81	98.64	94.88	0.38
温州市	2.48	10.1	66.02	40300	63000	0.27	60.03	5715	6.28	2441	0.03	0.01	65.8	89.14	95.35	0.22
嘉兴市	14.67	0.67	53.33	31660	67198	0.02	12.7	9540	12.59	879.4	0.06	9.66297e-05	84.8	100	97.6	0.33
湖州市	15.34	0.09	52.89	10887.8	50976	0	50.9	7630	14.79	1781	0.00830432	0.011573	84.8	100	96.49	0.52
绍兴市	12.16	-0.61	58.58	41704.5	62006	0	54.03	9925	5.79	1730	0.0063449	0.0112029	87.96	100	93.15	0.21
金华市	15.2	3.63	59.02	12309.3	28045	0	60.44	14320	8.21	3261.89	0.00654965	0.0172188	70.2	99.31	98.59	0.27
衢州市	28.36	3.55	44.13	12255.7	26322	0	71.5	4004	11.49	6319	0.0096161	0.0377669	75.65	100	97.24	0.52
舟山市	12.61	-1.21	63.59	3895.71	23898	0	50	2233	15.45	777.2	0.02	0.05	74.8	100	99.75	0.36
台州市	14.97	6.22	55.54	19510.3	25309.7	0	59.3	9502	10.14	2047	0.03	0.09	75.6	96.99	97.6	0.21
丽水市	29.6	7.58	48.4	14025.1	15200	6.88	80.79	3374	11.55	11670	0.06	0.53	66.9	99.57	94.99	0.47
单位	%（常住人口）	%	%（常住人口）	万吨	吨	万吨	%	公顷	㎡	m³（常住人口）	公顷（户籍人口）	公顷（户籍人口）	%	%	%（工业）	%
max	29.6	10.1	73.25	80468	110900	6.88	80.79	17503	15.45	11670	0.06	0.53	92	100	99.75	0.52
min	2.48	-1.21	44.13	3895.71	15200	0	12.7	2233	5.79	777.2	0.0063449	9.66297e-05	65.8	89.14	93.15	0.21
极差	27.12	11.31	29.12	76572.3	95700	6.88	68.09	15270	9.66	10892.8	0.0536551	0.529903	26.2	10.86	6.6	0.31
标准化
	人均GDP增速B1	人口自然增长率B2	城镇化水平B3	废水排放总量B4	SO2排放总量B5	固体废弃物排放量B6	森林覆盖率B7	绿地园林面积B8	人均公园绿地面积B9	人均水资源总量B10	人均耕地面积B11	人均林地面积B12	城镇生活污水处理率B13	生活垃圾无害化处理率B14	固体废物综合利用率B15	环保支出占GDP比重B16
杭州市	0.266224	0.408488	1	0	0.232163	0.973837	0.761639	1	0.965839	0.182295	0.440873	0.320631	1	1	0.148485	0.0645161
宁波市	0.757006	0.313882	0.830357	0.42424	0	0.99564	0.550742	0.887164	0.5	0.0736606	0.627249	0.113046	0.649237	0.87477	0.262121	0.548387
温州市	0	1	0.751717	0.524576	0.500522	0.960756	0.695109	0.228029	0.0507246	0.152743	0.440873	0.018689	0	0	0.333333	0.0322581
嘉兴市	0.449484	0.166225	0.315934	0.637411	0.456656	0.997093	0	0.47852	0.703934	0.00938234	1	0	0.725191	1	0.674242	0.387097
湖州市	0.474189	0.114943	0.300824	0.908687	0.626165	1	0.561022	0.353438	0.931677	0.0921526	0.0365189	0.0216575	0.725191	1	0.506061	1
绍兴市	0.356932	0.0530504	0.496223	0.506234	0.510909	1	0.606991	0.503733	0	0.0874706	0	0.0209591	0.845802	1	0	0
金华市	0.469027	0.42794	0.511332	0.890123	0.865778	1	0.701131	0.791552	0.250518	0.228104	0.00381605	0.0323118	0.167939	0.936464	0.824242	0.193548
衢州市	0.954277	0.420866	0	0.890823	0.883783	1	0.863563	0.115979	0.590062	0.508758	0.0609673	0.0710889	0.375954	1	0.619697	1
舟山市	0.373525	0	0.668269	1	0.909112	1	0.547804	0	1	0	0.254498	0.0941745	0.343511	1	1	0.483871
台州市	0.460546	0.656941	0.391827	0.79608	0.894361	1	0.684388	0.476031	0.450311	0.116572	0.440873	0.16966	0.374046	0.722836	0.674242	0
丽水市	1	0.777188	0.146635	0.867714	1	0	1	0.0747217	0.596273	1	1	1	0.0419847	0.960405	0.278788	0.83871
平移
	人均GDP增速B1	人口自然增长率B2	城镇化水平B3	废水排放总量B4	SO2排放总量B5	固体废弃物排放量B6	森林覆盖率B7	绿地园林面积B8	人均公园绿地面积B9	人均水资源总量B10	人均耕地面积B11	人均林地面积B12	城镇生活污水处理率B13	生活垃圾无害化处理率B14	固体废物综合利用率B15	环保支出占GDP比重B16
杭州市	0.266324	0.408588	1.0001	0.0001	0.232263	0.973937	0.761739	1.0001	0.965939	0.182395	0.440973	0.320731	1.0001	1.0001	0.148585	0.0646161	0.0001
宁波市	0.757106	0.313982	0.830457	0.42434	0.0001	0.99574	0.550842	0.887264	0.5001	0.0737606	0.627349	0.113146	0.649337	0.87487	0.262221	0.548487	0.0001
温州市	0.0001	1.0001	0.751817	0.524676	0.500622	0.960856	0.695209	0.228129	0.0508246	0.152843	0.440973	0.018789	0.0001	0.0001	0.333433	0.0323581	0.0001
嘉兴市	0.449584	0.166325	0.316034	0.637511	0.456756	0.997193	0.0001	0.47862	0.704034	0.00948234	1.0001	0.0001	0.725291	1.0001	0.674342	0.387197	0.0001
湖州市	0.474289	0.115043	0.300924	0.908787	0.626265	1.0001	0.561122	0.353538	0.931777	0.0922526	0.0366189	0.0217575	0.725291	1.0001	0.506161	1.0001	0.0001
绍兴市	0.357032	0.0531504	0.496323	0.506334	0.511009	1.0001	0.607091	0.503833	0.0001	0.0875706	0.0001	0.0210591	0.845902	1.0001	0.0001	0.0001	0.0001
金华市	0.469127	0.42804	0.511432	0.890223	0.865878	1.0001	0.701231	0.791652	0.250618	0.228204	0.00391605	0.0324118	0.168039	0.936564	0.824342	0.193648	0.0001
衢州市	0.954377	0.420966	0.0001	0.890923	0.883883	1.0001	0.863663	0.116079	0.590162	0.508858	0.0610673	0.0711889	0.376054	1.0001	0.619797	1.0001	0.0001
舟山市	0.373625	0.0001	0.668369	1.0001	0.909212	1.0001	0.547904	0.0001	1.0001	0.0001	0.254598	0.0942745	0.343611	1.0001	1.0001	0.483971	0.0001
台州市	0.460646	0.657041	0.391927	0.79618	0.894461	1.0001	0.684488	0.476131	0.450411	0.116672	0.440973	0.16976	0.374146	0.722936	0.674342	0.0001	0.0001
丽水市	1.0001	0.777288	0.146735	0.867814	1.0001	0.0001	1.0001	0.0748217	0.596373	1.0001	1.0001	1.0001	0.0420847	0.960505	0.278888	0.83881	0.0001
sum	5.56231	4.34062	5.41422	7.44699	6.88055	9.92843	6.97349	4.91027	6.04044	2.45224	4.30677	1.86332	5.24995	9.49558	5.32231	4.54949
Pij
	人均GDP增速B1	人口自然增长率B2	城镇化水平B3	废水排放总量B4	SO2排放总量B5	固体废弃物排放量B6	森林覆盖率B7	绿地园林面积B8	人均公园绿地面积B9	人均水资源总量B10	人均耕地面积B11	人均林地面积B12	城镇生活污水处理率B13	生活垃圾无害化处理率B14	固体废物综合利用率B15	环保支出占GDP比重B16
杭州市	0.0478801	0.0941312	0.184717	1.34282e-05	0.0337565	0.0980958	0.109234	0.203675	0.159912	0.0743789	0.102391	0.172129	0.190497	0.105323	0.0279173	0.0142029
宁波市	0.136114	0.0723356	0.153385	0.0569814	1.45337e-05	0.100292	0.0789908	0.180696	0.082792	0.0300789	0.145666	0.0607228	0.123684	0.0921345	0.0492683	0.12056
温州市	1.79781e-05	0.230405	0.13886	0.0704548	0.0727591	0.0967783	0.0996932	0.0464595	0.00841407	0.062328	0.102391	0.0100836	1.90478e-05	1.05312e-05	0.0626482	0.00711246
嘉兴市	0.0808268	0.0383181	0.0583711	0.0856065	0.0663837	0.100438	1.434e-05	0.0974733	0.116553	0.00386681	0.232216	5.36677e-05	0.138152	0.105323	0.126701	0.0851078
湖州市	0.0852683	0.0265037	0.0555804	0.122034	0.0910196	0.100731	0.080465	0.0719998	0.154257	0.0376198	0.00850263	0.0116767	0.138152	0.105323	0.0951016	0.219827
绍兴市	0.0641878	0.0122449	0.0916702	0.0679918	0.0742686	0.100731	0.087057	0.102608	1.65551e-05	0.0357105	2.32193e-05	0.011302	0.161125	0.105323	1.87888e-05	2.19805e-05
金华市	0.0843402	0.0986126	0.094461	0.119541	0.125844	0.100731	0.100557	0.161224	0.04149	0.0930594	0.000909279	0.0173947	0.0320077	0.0986316	0.154884	0.0425649
衢州市	0.171579	0.096983	1.84699e-05	0.119635	0.128461	0.100731	0.123849	0.0236401	0.0977019	0.207508	0.0141794	0.0382054	0.07163	0.105323	0.116453	0.219827
舟山市	0.0671709	2.30382e-05	0.123447	0.134296	0.132142	0.100731	0.0785696	2.03655e-05	0.165567	4.07791e-05	0.0591157	0.050595	0.0654504	0.105323	0.187907	0.106379
台州市	0.0828156	0.15137	0.0723885	0.106913	0.129998	0.100731	0.0981558	0.0969665	0.0745659	0.0475779	0.102391	0.0911063	0.0712665	0.076134	0.126701	2.19805e-05
丽水市	0.179799	0.179073	0.0271017	0.116532	0.145352	1.00721e-05	0.143415	0.0152378	0.0987301	0.407831	0.232216	0.536731	0.00801621	0.101153	0.0523998	0.184375
k	-0.417032
Ej	0.92326	0.865141	0.912627	0.945537	0.931639	0.960259	0.952324	0.87528	0.899889	0.748123	0.806312	0.63427	0.884113	0.958514	0.907956	0.797088
Dj	0.0767395	0.134859	0.0873729	0.054463	0.0683615	0.0397413	0.0476763	0.12472	0.100111	0.251877	0.193688	0.36573	0.115887	0.0414857	0.0920445	0.202912
W	0.0384146	0.0675084	0.0437375	0.0272633	0.0342206	0.0198938	0.023866	0.0624325	0.0501138	0.126085	0.0969569	0.183079	0.058011	0.0207671	0.046076	0.101575
指标偏离度
	人均GDP增速B1	人口自然增长率B2	城镇化水平B3	废水排放总量B4	SO2排放总量B5	固体废弃物排放量B6	森林覆盖率B7	绿地园林面积B8	人均公园绿地面积B9	人均水资源总量B10	人均耕地面积B11	人均林地面积B12	城镇生活污水处理率B13	生活垃圾无害化处理率B14	固体废物综合利用率B15	环保支出占GDP比重B16
杭州市	0.733776	0.591512	0	1	0.767837	0.0261628	0.238361	0	0.0341615	0.817705	0.559127	0.679369	0	0	0.851515	0.935484
宁波市	0.242994	0.686118	0.169643	0.57576	1	0.00436047	0.449258	0.112836	0.5	0.926339	0.372751	0.886954	0.350763	0.12523	0.737879	0.451613
温州市	1	0	0.248283	0.475424	0.499478	0.0392442	0.304891	0.771971	0.949275	0.847257	0.559127	0.981311	1	1	0.666667	0.967742
嘉兴市	0.550516	0.833775	0.684066	0.362589	0.543344	0.00290698	1	0.52148	0.296066	0.990618	0	1	0.274809	0	0.325758	0.612903
湖州市	0.525811	0.885057	0.699176	0.0913129	0.373835	0	0.438978	0.646562	0.068323	0.907847	0.963481	0.978343	0.274809	0	0.493939	0
绍兴市	0.643068	0.94695	0.503777	0.493766	0.489091	0	0.393009	0.496267	1	0.912529	1	0.979041	0.154198	0	1	1
金华市	0.530973	0.57206	0.488668	0.109877	0.134222	0	0.298869	0.208448	0.749482	0.771896	0.996184	0.967688	0.832061	0.0635359	0.175758	0.806452
衢州市	0.0457227	0.579134	1	0.109177	0.116217	0	0.136437	0.884021	0.409938	0.491242	0.939033	0.928911	0.624046	0	0.380303	0
舟山市	0.626475	1	0.331731	0	0.0908882	0	0.452196	1	0	1	0.745502	0.905826	0.656489	0	0	0.516129
台州市	0.539454	0.343059	0.608173	0.20392	0.105639	0	0.315612	0.523969	0.549689	0.883428	0.559127	0.83034	0.625954	0.277164	0.325758	1
丽水市	0	0.222812	0.853365	0.132286	0	1	0	0.925278	0.403727	0	0	0	0.958015	0.0395948	0.721212	0.16129
加权指标偏离度
	人均GDP增速B1	人口自然增长率B2	城镇化水平B3	废水排放总量B4	SO2排放总量B5	固体废弃物排放量B6	森林覆盖率B7	绿地园林面积B8	人均公园绿地面积B9	人均水资源总量B10	人均耕地面积B11	人均林地面积B12	城镇生活污水处理率B13	生活垃圾无害化处理率B14	固体废物综合利用率B15	环保支出占GDP比重B16	sum
杭州市	0.0281877	0.039932	0	0.0272633	0.0262759	0.000520479	0.00568871	0	0.00171196	0.103101	0.0542112	0.124378	0	0	0.0392344	0.0950214	0.545526
宁波市	0.00933451	0.0463188	0.00741975	0.0156971	0.0342206	8.67464e-05	0.010722	0.00704462	0.0250569	0.116798	0.0361408	0.162382	0.0203481	0.00260066	0.0339985	0.0458724	0.574042
温州市	0.0384146	0	0.0108593	0.0129616	0.0170924	0.000780718	0.00727651	0.0481961	0.0475718	0.106827	0.0542112	0.179657	0.058011	0.0207671	0.0307173	0.098298	0.731641
嘉兴市	0.0211478	0.0562869	0.0299193	0.00988538	0.0185936	5.7831e-05	0.023866	0.0325573	0.014837	0.124902	0	0.183079	0.015942	0	0.0150096	0.0622554	0.608339
湖州市	0.0201988	0.0597488	0.0305802	0.00248949	0.0127929	0	0.0104766	0.0403665	0.00342393	0.114466	0.0934161	0.179114	0.015942	0	0.0227587	0	0.605774
绍兴市	0.0247032	0.0639271	0.0220339	0.0134617	0.016737	0	0.00937954	0.0309832	0.0501138	0.115057	0.0969569	0.179241	0.00894521	0	0.046076	0.101575	0.77919
金华市	0.0203971	0.0386189	0.0213731	0.00299562	0.00459315	0	0.0071328	0.0130139	0.0375594	0.0973247	0.0965869	0.177163	0.0482687	0.00131945	0.0080982	0.081915	0.65636
衢州市	0.00175642	0.0390964	0.0437375	0.00297653	0.00397703	0	0.0032562	0.0551917	0.0205436	0.0619384	0.0910457	0.170064	0.0362015	0	0.0175228	0	0.547307
舟山市	0.0240658	0.0675084	0.0145091	0	0.00311025	0	0.0107921	0.0624325	0	0.126085	0.0722816	0.165837	0.0380836	0	0	0.0524256	0.637131
台州市	0.0207229	0.0231594	0.0265999	0.00555952	0.00361505	0	0.00753238	0.0327127	0.027547	0.111387	0.0542112	0.152018	0.0363123	0.00575588	0.0150096	0.101575	0.623717
丽水市	0	0.0150417	0.037324	0.00360654	0	0.0198938	0	0.0577675	0.0202323	0	0	0	0.0555755	0.000822269	0.0332305	0.016383	0.259877
障碍度
	人均GDP增速B1	人口自然增长率B2	城镇化水平B3	废水排放总量B4	SO2排放总量B5	固体废弃物排放量B6	森林覆盖率B7	绿地园林面积B8	人均公园绿地面积B9	人均水资源总量B10	人均耕地面积B11	人均林地面积B12	城镇生活污水处理率B13	生活垃圾无害化处理率B14	固体废物综合利用率B15	环保支出占GDP比重B16
杭州市	0.0516707	0.0731992	0	0.0499762	0.0481662	0.000954087	0.010428	0	0.00313819	0.188993	0.0993742	0.227997	0	0	0.0719203	0.174183
宁波市	0.016261	0.0806889	0.0129255	0.0273449	0.0596135	0.000151115	0.0186781	0.012272	0.04365	0.203466	0.0629585	0.282876	0.0354472	0.00453045	0.0592265	0.0799113
温州市	0.0525046	0	0.0148423	0.0177158	0.0233618	0.00106708	0.00994545	0.065874	0.0650207	0.14601	0.0740953	0.245554	0.0792889	0.0283842	0.0419841	0.134353
嘉兴市	0.0347632	0.0925255	0.049182	0.0162498	0.0305645	9.50637e-05	0.0392313	0.0535184	0.0243894	0.205317	0	0.300948	0.0262057	0	0.0246731	0.102337
湖州市	0.0333438	0.0986323	0.0504812	0.00410961	0.0211182	0	0.0172946	0.0666363	0.00565215	0.188959	0.15421	0.295677	0.0263167	0	0.0375697	0
绍兴市	0.0317036	0.082043	0.028278	0.0172765	0.02148	0	0.0120376	0.0397634	0.0643153	0.147662	0.124433	0.230036	0.0114801	0	0.0591331	0.130359
金华市	0.0310761	0.058838	0.032563	0.00456399	0.00699791	0	0.0108672	0.0198274	0.0572238	0.148279	0.147155	0.269917	0.07354	0.00201026	0.012338	0.124802
衢州市	0.0032092	0.0714341	0.0799139	0.0054385	0.00726654	0	0.00594949	0.100842	0.0375357	0.113169	0.166352	0.310728	0.0661448	0	0.0320164	0
舟山市	0.037772	0.105957	0.0227725	0	0.00488165	0	0.0169385	0.0979901	0	0.197895	0.113448	0.260287	0.0597735	0	0	0.0822838
台州市	0.0332248	0.0371312	0.0426474	0.00891353	0.00579598	0	0.0120766	0.052448	0.0441659	0.178586	0.0869163	0.243728	0.0582191	0.00922835	0.0240647	0.162854
丽水市	0	0.0578799	0.143622	0.0138779	0	0.076551	0	0.222288	0.0778533	0	0	0	0.213853	0.00316407	0.12787	0.0630413
