# Supplementary material for: Spatiotemporal Evolution Characteristics and Obstacle Factors of the Coordinated Development between the Tourism Industry and Ecological Security
Source: Research Square preprint supplement (doi:10.21203/rs.3.rs-6613050/v1), 2025-06-18
Supplement: Supplementary file 4 [file 障碍度计算过程.xlsx]

## Sheet: Sheet1
2010
	国内旅游收入A1_O	旅游外汇收入A2_O	国内游客接待量A3_O	入境游客接待量A4_O	旅行社营业收入A5_O	星级酒店营业收入A6_O	旅行社数量A7_O	星级酒店数量A8_O	旅行社职工人数A9_O	星级酒店从业人员A10_O	国内旅游收入增长率A11_O	旅游外汇收入增长率A12_O	国内游客数量增长率A13_O	入境游客数量增长率A14_O	旅游R&D全时当量A15_O	旅游R&D经费占比A16_O		产业经济绩效	产业构成要素	产业发展潜力	产业创新能力
杭州市	0	0	0	0	0	0	0	0	0	0	0.188597	0.133172	0.218021	0.46021	0	0		0	0	1	0
宁波市	0.0463762	0.126033	0.028683	0.122456	0.0510718	0.120586	0.0631083	0.0281358	0.0631083	0.0373188	0.0447591	0.021589	0.0481308	0.0640708	0.080292	0.0542825		0.495205	0.191671	0.17855	0.134574
温州市	0.0586582	0.1084	0.0307581	0.102653	0.0604797	0.100114	0.0680713	0.0821923	0.0680713	0.0858678	0.0225108	0.0207155	0.0267192	0.041301	0.0829343	0.040553		0.461064	0.304203	0.111246	0.123487
嘉兴市	0.0604727	0.104147	0.0342821	0.0881852	0.061737	0.106413	0.068424	0.106011	0.068424	0.119518	0.0122889	0.0214533	0.0187258	0.0385988	0.0732075	0.0181126		0.455236	0.362377	0.0910668	0.0913202
湖州市	0.0662982	0.109048	0.0358141	0.10012	0.0672705	0.109181	0.0722854	0.107287	0.0722854	0.119943	0.0135237	0	0.018683	0	0.0859124	0.0223486		0.487732	0.371801	0.0322067	0.108261
绍兴市	0.0610848	0.112704	0.0319877	0.0990515	0.0629679	0.110523	0.0704557	0.0870316	0.0704557	0.105369	0.0206775	0.00579537	0.02455	0.0347765	0.0811614	0.0214072		0.47832	0.333312	0.0857994	0.102569
金华市	0.0636324	0.0949311	0.0368419	0.0911469	0.0637787	0.108869	0.0703301	0.0899364	0.0703301	0.106644	0.0181113	0.00778302	0.020418	0.0432201	0.0829738	0.0310536		0.4592	0.337241	0.0895324	0.114027
衢州市	0.0668595	0.0991798	0.0420541	0.0952558	0.0669556	0.100992	0.0693705	0.0946207	0.0693705	0.105358	0.00798958	0.0120146	0.00759786	0.0416535	0.0815784	0.0391496		0.471297	0.338719	0.0692556	0.120728
舟山市	0.0653939	0.0972211	0.0389286	0.0923162	0.0655175	0.101539	0.0604514	0.0893271	0.0604514	0.101765	0.0236423	0.0249688	0.0180416	0.0455898	0.0822307	0.0326157		0.460917	0.311995	0.112242	0.114846
台州市	0.056034	0.105841	0.0291319	0.10181	0.0579456	0.0981431	0.0599491	0.0933336	0.0599491	0.106166	0.0307709	0.029654	0.0317508	0.0360623	0.0721654	0.0312935		0.448905	0.319398	0.128238	0.103459
丽水市	0.0713158	0.0910527	0.0410391	0.101131	0.070257	0.107262	0.0732238	0.0978915	0.0732238	0.110049	0	0.00590469	0	0.0257213	0.0877417	0.0441872		0.482057	0.354388	0.031626	0.131929
																		0	0	0	0
																		0	0	0	0
	国内旅游收入A1_O	旅游外汇收入A2_O	国内游客接待量A3_O	入境游客接待量A4_O	旅行社营业收入A5_O	星级酒店营业收入A6_O	旅行社数量A7_O	星级酒店数量A8_O	旅行社职工人数A9_O	星级酒店从业人员A10_O	国内旅游收入增长率A11_O	旅游外汇收入增长率A12_O	国内游客数量增长率A13_O	入境游客数量增长率A14_O	旅游R&D全时当量A15_O	旅游R&D经费占比A16_O		#VALUE!	#VALUE!	#VALUE!	#VALUE!
杭州市	0	0	0	0	0	0	0	0	0	0	0.316501	0.145715	0.229178	0.223211	0	0.0853954		0	0	0.914605	0.0853954
宁波市	0.0409726	0.0957597	0.029294	0.0711522	0.0507364	0.0501397	0.0725616	0.0387885	0.0725616	0.0479737	0.103985	0.0778494	0.0825474	0.0538257	0.0639857	0.0478672		0.338055	0.231885	0.318207	0.111853
温州市	0.0557096	0.102875	0.0291191	0.08079	0.0673095	0.0635117	0.0856764	0.0652072	0.0856764	0.0654889	0.0853012	0.0098122	0.0493472	0.0346281	0.0837708	0.0357762		0.399315	0.302049	0.179089	0.119547
嘉兴市	0.0538451	0.103662	0.0330782	0.0777275	0.0653154	0.0763174	0.0808812	0.0667327	0.0808812	0.0804455	0.075509	0.0350427	0.0442496	0.0459091	0.0677362	0.0126676		0.409945	0.308941	0.20071	0.0804038
湖州市	0.0594785	0.108993	0.0309579	0.084957	0.0718134	0.0831305	0.0877749	0.079032	0.0877749	0.0926144	0.0589181	0.0191898	0.0101296	0.0404134	0.0848232	0		0.43933	0.347196	0.128651	0.0848232
绍兴市	0.0484518	0.0994178	0.0264	0.0754879	0.0591496	0.0701259	0.0809352	0.0596524	0.0809352	0.0734092	0.0819408	0.0467518	0.0582978	0.0528087	0.0691993	0.0170367		0.379033	0.294932	0.239799	0.086236
金华市	0.0555451	0.0972393	0.0314359	0.0785543	0.0667842	0.0787377	0.0837413	0.0736782	0.0837413	0.0880801	0.0609455	0.0412206	0	0.0514833	0.0800544	0.0287587		0.408297	0.329241	0.153649	0.108813
衢州市	0.0556208	0.0916613	0.0350519	0.0782445	0.0665253	0.0745448	0.0776669	0.0665786	0.0776669	0.0766876	0.0544335	0.0489777	0.0343244	0.0497972	0.0742692	0.0379493		0.401649	0.2986	0.187533	0.112218
舟山市	0.0526338	0.0976216	0.0413807	0.0818512	0.069885	0.0791725	0.0753712	0.0706061	0.0753712	0.0822441	0	0.0522552	0.0575928	0.0505695	0.0811049	0.0323401		0.422545	0.303593	0.160418	0.113445
台州市	0.05458	0.116921	0.0294472	0.0982193	0.0669324	0.0784379	0.0854354	0.0755252	0.0854354	0.0892111	0.076337	0.0105849	0.0254664	0	0.0735717	0.0338956		0.444537	0.335607	0.112388	0.107467
丽水市	0.0624637	0.0753966	0.0307781	0.0860974	0.0764824	0.0859407	0.0896443	0.0807818	0.0896443	0.0923131	0.0522598	0	0.0102941	0.0335089	0.0875277	0.0468672		0.417159	0.352384	0.0960628	0.134395
																		0	0	0	0
2018																		0	0	0	0
	国内旅游收入A1_O	旅游外汇收入A2_O	国内游客接待量A3_O	入境游客接待量A4_O	旅行社营业收入A5_O	星级酒店营业收入A6_O	旅行社数量A7_O	星级酒店数量A8_O	旅行社职工人数A9_O	星级酒店从业人员A10_O	国内旅游收入增长率A11_O	旅游外汇收入增长率A12_O	国内游客数量增长率A13_O	入境游客数量增长率A14_O	旅游R&D全时当量A15_O	旅游R&D经费占比A16_O		#VALUE!	#VALUE!	#VALUE!	#VALUE!
杭州市	0	0	0	0	0	0	0	0	0	0	0.787906	0.0951353	0.116959	0	0	0		0	0	1	0
宁波市	0.0385644	0.209677	0.00928042	0.1386	0.0437206	0.044208	0.0882461	0.0221135	0.0882461	0.0244669	0.0606426	0.0358368	0.00838685	0.0286208	0.0576902	0.1017		0.48405	0.223073	0.133487	0.15939
温州市	0.0495771	0.18796	0.00883431	0.129865	0.0537824	0.073129	0.0887664	0.0407886	0.0887664	0.0331626	0.0591943	0.0310203	0.00207008	0.0267987	0.072352	0.0539329		0.503148	0.251484	0.119083	0.126285
嘉兴市	0.0521275	0.188115	0.0105917	0.130713	0.0562665	0.0969418	0.0913923	0.0708837	0.0913923	0.0678161	0.0524145	0	0.000517779	0.0124333	0.063466	0.0149285		0.534756	0.321484	0.0653656	0.0783945
湖州市	0.0498441	0.184997	0.0093705	0.112932	0.0570415	0.0986421	0.0929006	0.0554062	0.0929006	0.0523054	0	0.00936787	0.0171785	0.000202152	0.0771199	0.0897913		0.512827	0.293513	0.0267485	0.166911
绍兴市	0.0474955	0.179398	0.00920352	0.129619	0.0515026	0.0878812	0.0908193	0.0431062	0.0908193	0.0403932	0.0705975	0.0346177	0.00627199	0.0327917	0.0618401	0.0236424		0.5051	0.265138	0.144279	0.0854825
金华市	0.0489365	0.174783	0.00850825	0.118239	0.0527684	0.0932789	0.0873259	0.0520514	0.0873259	0.0490556	0.0604279	0.0101659	0	0.00229783	0.0679999	0.0868354		0.496514	0.275759	0.0728916	0.154835
衢州市	0.0579471	0.171098	0.0127981	0.125604	0.0614182	0.094023	0.0916998	0.0504466	0.0916998	0.0478818	0.0564104	0.00708797	0.00370516	0.000139873	0.0754891	0.0525504		0.522889	0.281728	0.0673434	0.12804
舟山市	0.0519904	0.169724	0.0226145	0.124887	0.0550217	0.0897496	0.0845194	0.0535432	0.0845194	0.0508871	0.0675119	0.0111889	0.00392327	0.000289432	0.074032	0.0555977		0.513988	0.273469	0.0829135	0.12963
台州市	0.0474961	0.190067	0.00844657	0.135929	0.0518221	0.0906311	0.0922737	0.044635	0.0922737	0.0417659	0.0771016	0.0108646	0.00406426	0.00449612	0.0627292	0.045404		0.524392	0.270948	0.0965266	0.108133
丽水市	0.0513474	0.159412	0.0121668	0.117076	0.0546551	0.0853136	0.0827257	0.0570124	0.0827257	0.0546048	0.066258	0.00473846	0.0204764	0.0331578	0.0707607	0.0475692		0.479971	0.277069	0.124631	0.11833
																		0	0	0	0
2022																		0	0	0	0
	国内旅游收入A1_O	旅游外汇收入A2_O	国内游客接待量A3_O	入境游客接待量A4_O	旅行社营业收入A5_O	星级酒店营业收入A6_O	旅行社数量A7_O	星级酒店数量A8_O	旅行社职工人数A9_O	星级酒店从业人员A10_O	国内旅游收入增长率A11_O	旅游外汇收入增长率A12_O	国内游客数量增长率A13_O	入境游客数量增长率A14_O	旅游R&D全时当量A15_O	旅游R&D经费占比A16_O		#VALUE!	#VALUE!	#VALUE!	#VALUE!
杭州市	0	0	0	0	0	0	0	0	0	0	0.36232	0.169986	0.207577	0.109946	0	0.150171		0	0	0.849829	0.150171
宁波市	0.0593201	0.160054	0.0426919	0.132196	0.0593201	0.0882664	0.106563	0.0246052	0.106563	0.0535888	0.0438179	0.0173292	0	0.00511898	0.0406891	0.059876		0.541849	0.29132	0.0662661	0.100565
温州市	0.0612085	0.176288	0.0458937	0.177002	0.0612085	0.06621	0.106484	0.049934	0.106484	0.042868	0	0	0.0147551	0.015988	0.0425835	0.0330922		0.587811	0.305771	0.0307431	0.0756756
嘉兴市	0.0736494	0.0762722	0.0570794	0.129002	0.0736494	0.0867086	0.10883	0.0633701	0.10883	0.0617473	0.0517381	0.00649824	0.0161059	0.0141009	0.0490259	0.0233926		0.496361	0.342777	0.0884432	0.0724185
湖州市	0.0688325	0.126459	0.0568953	0.125891	0.0688325	0.0816102	0.103092	0.0623579	0.103092	0.0607081	0.0352078	0.0236792	0.0187973	0.0202957	0.0442497	0		0.528521	0.32925	0.0979799	0.0442497
绍兴市	0.0690775	0.135056	0.0543822	0.132835	0.0690775	0.0801876	0.0997153	0.0471454	0.0997153	0.0463332	0.0318551	0.0212472	0.0170073	0.0139759	0.0492761	0.0331131		0.540616	0.292909	0.0840855	0.0823892
金华市	0.0658205	0.114663	0.0559512	0.120792	0.0658205	0.0824688	0.109253	0.0602869	0.109253	0.0594083	0.0373262	0.0139031	0.0358653	0.00550569	0.0420296	0.0216517		0.505516	0.338202	0.0926002	0.0636813
衢州市	0.0733672	0.125477	0.0610717	0.124132	0.0733672	0.0827098	0.0995789	0.0454879	0.0995789	0.044547	0.0157274	0.0144607	0.0348257	0.00794392	0.0519496	0.045775		0.540125	0.289193	0.0729577	0.0977246
舟山市	0.072611	0.113775	0.0609123	0.110886	0.072611	0.0817698	0.0983418	0.0597491	0.0983418	0.0577224	0.0153985	0.0255251	0.0213934	0.0194647	0.0541083	0.0373897		0.512565	0.314155	0.0817818	0.0914979
台州市	0.063347	0.137371	0.0497328	0.134165	0.063347	0.0751398	0.100778	0.0512065	0.100778	0.0501474	0.00250431	0.0361252	0.0327498	0.0310902	0.0402109	0.0313056		0.523103	0.302911	0.10247	0.0715165
丽水市	0.0710197	0.132607	0.0544638	0.1311	0.0710197	0.08135	0.0994927	0.0594468	0.0994927	0.0576221	0.022655	0.00623664	0.022543	0	0.0505813	0.0403694		0.54156	0.316054	0.0514347	0.0909507
																				平均值
																				产业经济绩效	产业构成要素	产业发展潜力	产业创新能力
0	0	1	0		0	0	0.914605	0.0853954		0	0	1	0		0	0	0.849829	0.150171		0	0	94.1108	5.88916
0.495205	0.191671	0.17855	0.134574		0.338055	0.231885	0.318207	0.111853		0.48405	0.223073	0.133487	0.15939		0.541849	0.29132	0.0662661	0.100565		46.479	23.4487	17.4127	12.6596
0.461064	0.304203	0.111246	0.123487		0.399315	0.302049	0.179089	0.119547		0.503148	0.251484	0.119083	0.126285		0.587811	0.305771	0.0307431	0.0756756		48.7834	29.0877	11.004	11.1249
0.455236	0.362377	0.0910668	0.0913202		0.409945	0.308941	0.20071	0.0804038		0.534756	0.321484	0.0653656	0.0783945		0.496361	0.342777	0.0884432	0.0724185		47.4074	33.3895	11.1396	8.06342
0.487732	0.371801	0.0322067	0.108261		0.43933	0.347196	0.128651	0.0848232		0.512827	0.293513	0.0267485	0.166911		0.528521	0.32925	0.0979799	0.0442497		49.2102	33.544	7.13965	10.1061
0.47832	0.333312	0.0857994	0.102569		0.379033	0.294932	0.239799	0.086236		0.5051	0.265138	0.144279	0.0854825		0.540616	0.292909	0.0840855	0.0823892		47.5767	29.6573	13.8491	8.91691
0.4592	0.337241	0.0895324	0.114027		0.408297	0.329241	0.153649	0.108813		0.496514	0.275759	0.0728916	0.154835		0.505516	0.338202	0.0926002	0.0636813		46.7382	32.0111	10.2168	11.0339
0.471297	0.338719	0.0692556	0.120728		0.401649	0.2986	0.187533	0.112218		0.522889	0.281728	0.0673434	0.12804		0.540125	0.289193	0.0729577	0.0977246		48.399	30.206	9.92724	11.4678
0.460917	0.311995	0.112242	0.114846		0.422545	0.303593	0.160418	0.113445		0.513988	0.273469	0.0829135	0.12963		0.512565	0.314155	0.0817818	0.0914979		47.7504	30.0803	10.9339	11.2355
0.448905	0.319398	0.128238	0.103459		0.444537	0.335607	0.112388	0.107467		0.524392	0.270948	0.0965266	0.108133		0.523103	0.302911	0.10247	0.0715165		48.5234	30.7216	10.9906	9.7644
0.482057	0.354388	0.031626	0.131929		0.417159	0.352384	0.0960628	0.134395		0.479971	0.277069	0.124631	0.11833		0.54156	0.316054	0.0514347	0.0909507		48.0187	32.4974	7.59385	11.8901
障碍度生态安全
2010
	人均GDP增速B1_O	人口自然增长率B2_O	城镇化水平B3_O	废水排放总量B4_O	SO2排放总量B5_O	固体废弃物排放量B6_O	森林覆盖率B7_O	绿地园林面积B8_O	人均公园绿地面积B9_O	人均水资源总量B10_O	人均耕地面积B11_O	人均林地面积B12_O	城镇生活污水处理率B13_O	生活垃圾无害化处理率B14_O	固体废物综合利用率B15_O	环保支出占GDP比重B16_O		压力	状态	响应
杭州市	0.0545933	0.0769063	0	0.053024	0.0512294	0.00101559	0.0109699	0	0.00333792	0.192625	0.102213	0.210189	0	0	0.0760302	0.167866		0.236769	0.519335	0.243896
宁波市	0.0169278	0.0834832	0.0134522	0.0285704	0.0624384	0.000158405	0.0193493	0.0127762	0.0457204	0.204215	0.0759603	0.25475	0.0369063	0.00474624	0.0616567	0.0788886		0.20503	0.612772	0.182198
温州市	0.0549475	0	0.0155382	0.0186189	0.0246131	0.00112515	0.0103636	0.0689847	0.0685062	0.147411	0.0786594	0.226851	0.0830394	0.0299115	0.0439645	0.127466		0.114843	0.600776	0.284381
嘉兴市	0.0370348	0.0979949	0.0523973	0.0173798	0.0327704	0.000102008	0.0416028	0.0570356	0.0261507	0.21095	0	0.273371	0.0279301	0	0.0262933	0.0989871		0.237679	0.60911	0.15321
湖州市	0.0405766	0.119335	0.0614385	0.00502116	0.025866	0	0.0209512	0.0811264	0.00692317	0.221783	0.0259257	0.308707	0.0320417	0	0.0457369	0.00456672		0.252238	0.665417	0.0823454
绍兴市	0.036927	0.0950056	0.0329396	0.0202031	0.0251805	0	0.0139571	0.0463332	0.0753681	0.165878	0.0385821	0.226054	0.0133779	0	0.0688998	0.141295		0.210256	0.566172	0.223573
金华市	0.0363499	0.0684224	0.0380914	0.00535969	0.00823817	0	0.0126534	0.0232011	0.0673687	0.167276	0.068994	0.265138	0.0860594	0.0023671	0.0144367	0.136044		0.156462	0.604632	0.238907
衢州市	0.00364857	0.080653	0.0907608	0.00620081	0.00830548	0	0.00672578	0.114567	0.0429042	0.123953	0.107111	0.303646	0.0751528	0	0.036372	0		0.189569	0.698907	0.111525
舟山市	0.0400617	0.111765	0.0241628	0	0.00521272	0	0.0178896	0.104006	0	0.202499	0.10745	0.239618	0.0634482	0	0	0.0838858		0.181202	0.671464	0.147334
台州市	0.0351314	0.0390336	0.0450976	0.00946243	0.00616805	0	0.0127113	0.055479	0.0470031	0.18212	0.0872637	0.223832	0.0615883	0.00982306	0.0254542	0.159831		0.134893	0.60841	0.256697
丽水市	0	0.0572585	0.14292	0.013864	0	0.0767255	0	0.221273	0.0779705	0	0.00138326	0	0.212893	0.00316944	0.12728	0.0652619		0.290768	0.300627	0.408605
																		0	0	0
2014																		0	0	0
	人均GDP增速B1_O	人口自然增长率B2_O	城镇化水平B3_O	废水排放总量B4_O	SO2排放总量B5_O	固体废弃物排放量B6_O	森林覆盖率B7_O	绿地园林面积B8_O	人均公园绿地面积B9_O	人均水资源总量B10_O	人均耕地面积B11_O	人均林地面积B12_O	城镇生活污水处理率B13_O	生活垃圾无害化处理率B14_O	固体废物综合利用率B15_O	环保支出占GDP比重B16_O		#VALUE!	#VALUE!	#VALUE!
杭州市	0.10646	0.0127486	0	0.0360204	0.0309922	0.0487148	0.0678811	0	0.00961526	0.28675	0.196553	0	0	0	0.088428	0.115837		0.234936	0.560799	0.204265
宁波市	0.118196	0.0343983	0.00959304	0.0531368	0.0443852	0	0.0548	0.010347	0.0725885	0.216616	0.140444	0.0771666	0.0149483	0	0.0546575	0.0987224		0.25971	0.571962	0.168328
温州市	0.121985	0	0.0199855	0	0.00821602	0	0.0659188	0.0512156	0.0501311	0.21176	0.152408	0.162799	0.026347	0.00689954	0	0.122335		0.150187	0.694232	0.155582
嘉兴市	0.0888106	0.0387374	0.0390465	0.0142762	0.0264318	0	0.0780599	0.0435901	0.0428306	0.233356	0.119455	0.152131	0.0135629	0	0.02696	0.0827511		0.207303	0.669424	0.123274
湖州市	0.0757587	0.0418219	0.0500563	0.0180005	0.0111339	0	0.106098	0.0725589	0	0.247243	0.104755	0.168398	0.00856814	0.0408784	0.0131894	0.0415399		0.196771	0.699053	0.104176
绍兴市	0.0843237	0.0437271	0.0327368	0.0422983	0.0209459	0	0.0845811	0.0501708	0.0438346	0.217523	0.0640632	0.143898	0.0238421	0	0.0227843	0.125271		0.224032	0.60407	0.171898
金华市	0.0809704	0.0373521	0.0339682	0.00183902	0.0116959	0	0.0716846	0.0330177	0.100218	0.231386	0.0933529	0.157577	0.0349768	0.00588821	0.00796581	0.0981075		0.165826	0.687236	0.146938
衢州市	0.114408	0.0265378	0.0857448	0.00843851	0.0187231	0	0.0383069	0.117514	0.068891	0.157655	0.1295	0.171938	0.026283	0	0.03606	0		0.253852	0.683805	0.062343
舟山市	0	0.0733604	0.0251644	0.00148065	0	0	0.055988	0.0458233	0.0459464	0.279798	0.139027	0.149588	0.0372505	0	0.0326018	0.113971		0.100005	0.716171	0.183824
台州市	0.102545	0.0252714	0.0411834	0.000841348	0.00601636	0	0.0678944	0.0542235	0.060376	0.218239	0.140967	0.125478	0.020829	0	0.0284824	0.107654		0.175857	0.667178	0.156965
丽水市	0.190116	0.0273579	0.0855937	0.000182799	0.00853677	0	0	0.156731	0.122012	0	0	0.161093	0.0868756	0	0.0367765	0.124725		0.311787	0.439836	0.248377
																		0	0	0
2018																		0	0	0
	人均GDP增速B1_O	人口自然增长率B2_O	城镇化水平B3_O	废水排放总量B4_O	SO2排放总量B5_O	固体废弃物排放量B6_O	森林覆盖率B7_O	绿地园林面积B8_O	人均公园绿地面积B9_O	人均水资源总量B10_O	人均耕地面积B11_O	人均林地面积B12_O	城镇生活污水处理率B13_O	生活垃圾无害化处理率B14_O	固体废物综合利用率B15_O	环保支出占GDP比重B16_O		#VALUE!	#VALUE!	#VALUE!
杭州市	0.0432024	0.00580797	0	0.0634135	0.120972	0.0356449	0.0577946	0	0.074125	0.183449	0.111653	0.105475	0.019294	0	0.0701949	0.108973		0.269041	0.532497	0.198462
宁波市	0.0130971	0.0345965	0.0155165	0.0468512	0.123355	0	0.119574	0.0433661	0.0841633	0.190548	0.0841064	0.115934	0.0244252	0	0.00739352	0.0970733		0.233417	0.637691	0.128892
温州市	0	0	0.0296262	0.0373161	0.0464589	0	0.0884865	0.130162	0.0899732	0.196923	0.0853765	0.130798	0.0256587	0	0.00671574	0.132505		0.113401	0.72172	0.164879
嘉兴市	0.00811968	0.036168	0.0404796	0.0234298	0.122724	0	0.0995407	0.106955	0.0484106	0.197703	0.0542494	0.13543	0.046353	0	0.00233075	0.0781071		0.230921	0.642288	0.126791
湖州市	0.00189429	0.041164	0.0550883	0.0125907	0.142455	0	0.140678	0.14609	0.0182161	0.18901	0.0849875	0.133842	0	0	0	0.033984		0.253192	0.712824	0.033984
绍兴市	0.00579689	0.0416453	0.0391123	0.0276812	0.0732046	0	0.0978834	0.114457	0.0592489	0.185788	0.0809378	0.116765	0.0219886	0	0.0330686	0.102422		0.18744	0.65508	0.15748
金华市	0.0226838	0.0102422	0.037009	0.0310564	0.0805239	0	0.078996	0.106989	0.105041	0.201309	0.080133	0.111009	0.0205916	0	0.0106853	0.103731		0.181515	0.683476	0.135008
衢州市	0.0146951	0.0360932	0.103892	0.0120305	0.117914	0	0.055713	0.217498	0.0847876	0.135876	0.0772568	0.122543	0.0189674	0	0.00273402	0		0.284625	0.693673	0.0217014
舟山市	0.0111976	0.0621772	0.0350313	0	0	0	0.119099	0.120321	0	0.216923	0.112397	0.127503	0.0330356	0	0.0728015	0.0895131		0.108406	0.696244	0.19535
台州市	0.00192132	0.0228754	0.0604957	0.0248314	0.0532631	0	0.0861256	0.139503	0.0332569	0.211891	0.0806467	0.135003	0.0240906	0	0.0259824	0.100114		0.163387	0.686426	0.150187
丽水市	0	0.0257349	0.125685	0.00856587	0.0951321	0	0	0.322465	0.179732	0	0	0	0.028797	0.0738906	0.0589195	0.0810781		0.255118	0.502197	0.242685
																		0	0	0
2022																		0	0	0
人均GDP增速B1_O	人口自然增长率B2_O	城镇化水平B3_O	废水排放总量B4_O	SO2排放总量B5_O	固体废弃物排放量B6_O	森林覆盖率B7_O	绿地园林面积B8_O	人均公园绿地面积B9_O	人均水资源总量B10_O	人均耕地面积B11_O	人均林地面积B12_O	城镇生活污水处理率B13_O	生活垃圾无害化处理率B14_O	固体废物综合利用率B15_O	环保支出占GDP比重B16_O			#VALUE!	#VALUE!	#VALUE!
杭州市	0.153226	0	0	0.0140701	0.0146085	0.0348823	0.0469786	0	0.0852688	0.233939	0.126854	0.103666	0.0097517	0	0.0361631	0.140592		0.216787	0.596706	0.186507
宁波市	0.0882313	0.0243168	0.0151895	0.0681972	0.040235	0	0.106068	0.0487863	0.0478387	0.220189	0.0845143	0.112756	0	0	0.00886954	0.134809		0.23617	0.620152	0.143678
温州市	0.120665	0.0153332	0.0291726	0.0499737	0.0135726	0	0.0548856	0.103694	0.0704665	0.20584	0.098781	0.101833	0.00899545	0	0.0113019	0.115485		0.228717	0.635501	0.135782
嘉兴市	0.156639	0.0154286	0.0359846	0.0384376	0.0216417	0	0.0807799	0.115186	0.0223003	0.246675	0.018686	0.133486	0.00593909	0	0.00465988	0.104156		0.268132	0.617113	0.114755
湖州市	0.1499	0.0285657	0.0591849	0.0240009	0.0188123	0	0.109969	0.143166	0	0.247488	0.061118	0.121543	0.00548987	0	0	0.0307623		0.280463	0.683284	0.0362522
绍兴市	0.112137	0.0261276	0.0331648	0.0522715	0.0175155	0	0.092773	0.100683	0.0236347	0.198667	0.0658483	0.100313	0.00831378	0	0.0301348	0.138416		0.241216	0.581919	0.176864
金华市	0.148475	0.019603	0.0457927	0.005516	0.0137723	0	0.058244	0.106526	0.0665851	0.224595	0.0628484	0.101919	0.00791342	0	0.012512	0.125699		0.233159	0.620717	0.146124
衢州市	0.166502	0.0418494	0.109744	0.00992432	0.0216928	0	0.0477888	0.214584	0.0326887	0.139761	0.0165612	0.109701	0.014573	0	0.0746287	0		0.349713	0.561085	0.0892017
舟山市	0	0.0482271	0.0333347	0.00644803	0.00455007	0	0.11532	0.122205	0.0232284	0.235811	0.121214	0.116834	0.0352724	0	0.00171371	0.135841		0.0925599	0.734613	0.172827
台州市	0.132986	0.0281907	0.0677577	0.00352116	0.0192573	0	0.0719706	0.135749	0.0450589	0.235618	0.104692	0.12097	0.0079048	0	0.0197806	0.0065436		0.251713	0.714058	0.034229
丽水市	0.268568	0.0541464	0.138188	0	0	0	0	0.326805	0.104867	0	0	0	0.0110048	0.0737192	0.0191065	0.00359576		0.460902	0.431671	0.107426
															平均值	压力	状态	响应
0.236769	0.519335	0.243896		0.234936	0.560799	0.204265		0.269041	0.532497	0.198462		0.216787	0.596706	0.186507		23.9383	55.2334	20.8283
0.20503	0.612772	0.182198		0.25971	0.571962	0.168328		0.233417	0.637691	0.128892		0.23617	0.620152	0.143678		23.3582	61.0644	15.5774
0.114843	0.600776	0.284381		0.150187	0.694232	0.155582		0.113401	0.72172	0.164879		0.228717	0.635501	0.135782		15.1787	66.3057	18.5156
0.237679	0.60911	0.15321		0.207303	0.669424	0.123274		0.230921	0.642288	0.126791		0.268132	0.617113	0.114755		23.6009	63.4484	12.9508
0.252238	0.665417	0.0823454		0.196771	0.699053	0.104176		0.253192	0.712824	0.033984		0.280463	0.683284	0.0362522		24.5666	69.0144	6.41894
0.210256	0.566172	0.223573		0.224032	0.60407	0.171898		0.18744	0.65508	0.15748		0.241216	0.581919	0.176864		21.5736	60.181	18.2454
0.156462	0.604632	0.238907		0.165826	0.687236	0.146938		0.181515	0.683476	0.135008		0.233159	0.620717	0.146124		18.424	64.9015	16.6744
0.189569	0.698907	0.111525		0.253852	0.683805	0.062343		0.284625	0.693673	0.0217014		0.349713	0.561085	0.0892017		26.944	65.9367	7.11927
0.181202	0.671464	0.147334		0.100005	0.716171	0.183824		0.108406	0.696244	0.19535		0.0925599	0.734613	0.172827		12.0543	70.4623	17.4834
0.134893	0.60841	0.256697		0.175857	0.667178	0.156965		0.163387	0.686426	0.150187		0.251713	0.714058	0.034229		18.1462	66.9018	14.9519
0.290768	0.300627	0.408605		0.311787	0.439836	0.248377		0.255118	0.502197	0.242685		0.460902	0.431671	0.107426		32.9644	41.8583	25.1773
